# Supplementary material for: Synthesis and investigation of the photophysical, electrochemical and theoretical properties of phenazine–amine based cyan blue-red fluorescent materials for organic electronics
Source: Royal Society of Chemistry journal article supplement (doi:10.1039/c9nj06109f), 2020-01-01
Supplement: c9nj06109f1.pdf [file c9nj06109f1.pdf]

## Synthesis and Investigation of Photophysical, Electrochemical and Theoretical properties of Phenazine-Amine based Cyan blue-Red Fluorescent Materials for Organic Electronics

Deepali N. Kanekar<sup>a</sup>, Dr. Sajeer Chacko<sup>b</sup> and Prof. Rajesh M. Kamble<sup>a\*</sup>

<sup>a</sup>Department of Chemistry, University of Mumbai, Santacruz (E), Mumbai 400 098, India

<sup>b</sup>Department of Physics, University of Mumbai, Santacruz (E), Mumbai 400 098, India

e-mail: kamblerm@chem.mu.ac.in

### Supporting Information

Sr.

No.

|     |                                                                                                                    |       |
|-----|--------------------------------------------------------------------------------------------------------------------|-------|
| 1.  | Absorption spectra of compound <b>1</b> in neat solid film and various solvents and <b>2–8</b> in various solvents | 3     |
| 2.  | Emission spectra of compound <b>2–8</b> in various solvents                                                        | 4     |
| 3.  | Solvatochromic fluorescence of <b>1–8</b> .                                                                        | 5     |
| 4.  | Aggregation Induced Emission studies of dye <b>5</b> and <b>7</b>                                                  | 6     |
| 5.  | Absorption spectra of <b>2, 3, 5</b> and <b>7</b> in THF/Water mixture (0–100%)                                    | 7     |
| 6.  | Cyclic Voltammetry (CV) of compounds <b>1–8</b> in anhydrous dichloromethane                                       | 8     |
| 7.  | MALDI-TOF Spectra of compounds <b>1–8</b>                                                                          | 9–12  |
| 8.  | FTIR Spectra of compounds <b>1–8</b>                                                                               | 13–16 |
| 9.  | <sup>1</sup> H and <sup>13</sup> C NMR Spectra of compounds <b>1–8</b>                                             | 17–23 |
| 10. | Optimized Structures of compounds <b>1–8</b>                                                                       | 24–31 |
| 11. | Frontier Molecular Orbitals of compound <b>1–8</b>                                                                 | 32–36 |
| 12. | Cartesian Coordinates and Charges (Mulliken and Lowdin) of compounds <b>1–8</b>                                    | 37–53 |
| A)  | <b>Table S1.</b> Cartesian Coordinates of Optimized Structure of compound <b>1</b>                                 |       |
| B)  | <b>Table S2.</b> Cartesian Coordinates of Optimized Structure of compound <b>2</b>                                 |       |

|            |                                                                                    |              |
|------------|------------------------------------------------------------------------------------|--------------|
| <b>C)</b>  | <b>Table S3.</b> Cartesian Coordinates of Optimized Structure of compound <b>3</b> |              |
| <b>D)</b>  | <b>Table S4.</b> Cartesian Coordinates of Optimized Structure of compound <b>4</b> |              |
| <b>E)</b>  | <b>Table S5.</b> Cartesian Coordinates of Optimized Structure of compound <b>5</b> |              |
| <b>F)</b>  | <b>Table S6.</b> Cartesian Coordinates of Optimized Structure of compound <b>6</b> |              |
| <b>G)</b>  | <b>Table S7.</b> Cartesian Coordinates of Optimized Structure of compound <b>7</b> |              |
| <b>H)</b>  | <b>Table S8.</b> Cartesian Coordinates of Optimized Structure of compound <b>8</b> |              |
| <b>13.</b> | Vertical electronic transition in implicit water                                   | <b>54–58</b> |
| <b>14.</b> | Thermogram (TGA) curve of <b>1</b>                                                 | <b>59</b>    |

1. Absorption spectra of compound 1–8 in various solvents.

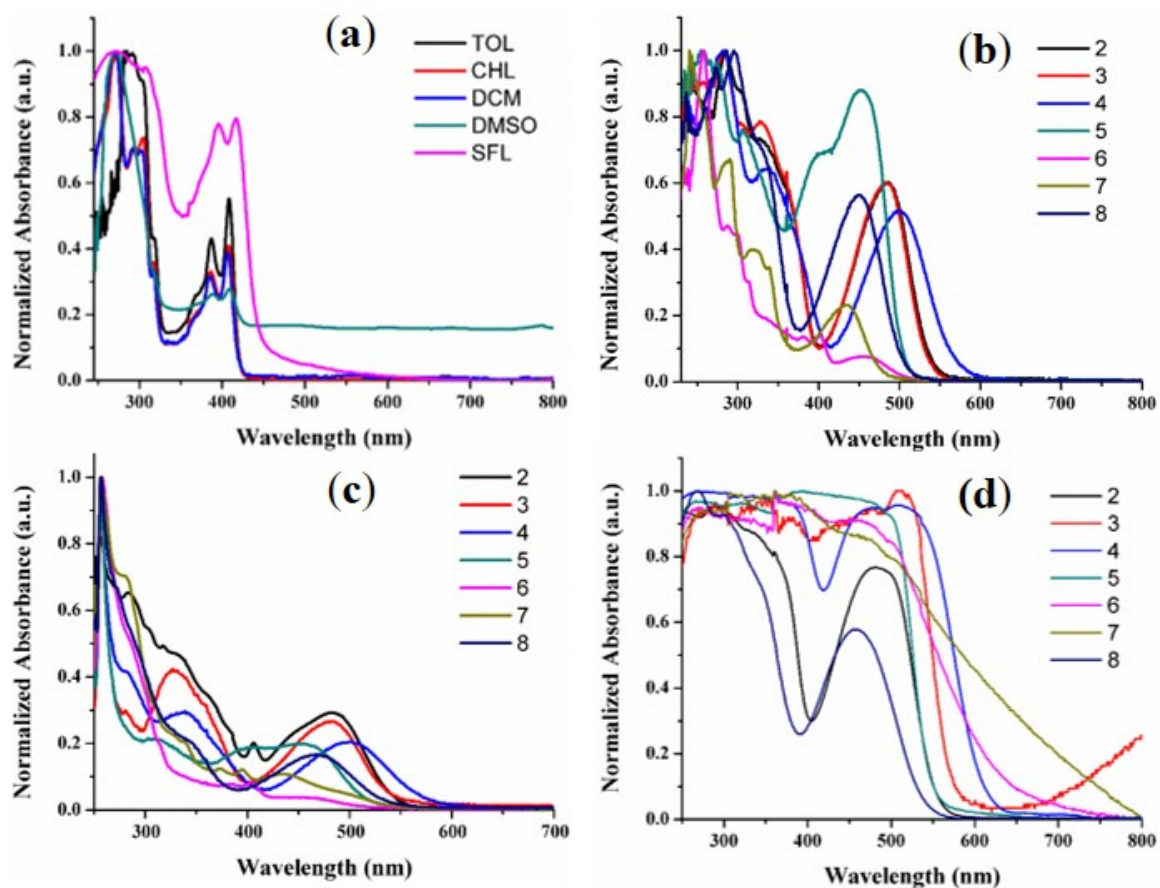

**Figure S1:** Absorption spectra of compound 1 in various solvent and neat solid flim (a); Absorption spectra of compounds 2–8 in chloroform (b), dimethyl sulphoxide (DMSO) (c) and in neat solid film (d).

2. Emission spectra of compound 2–8 in various solvents.

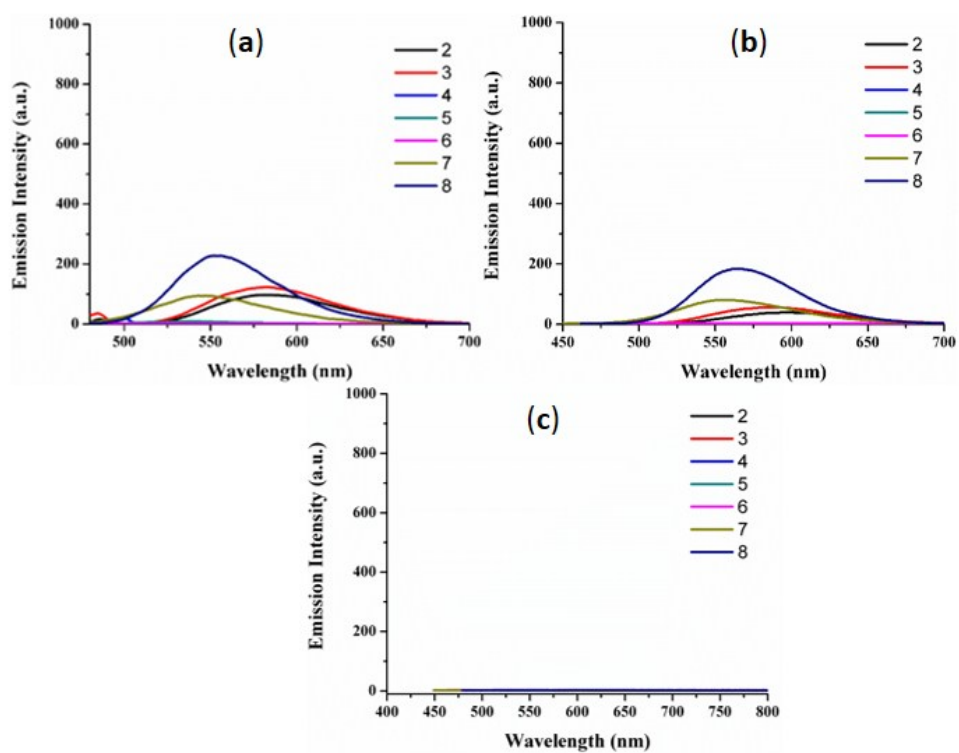

**Figure S2:** Emission spectra of 2–8 in chloroform (a); DCM (b) and in DMSO (c).

3. Solvatochromic fluorescence of 1–8.

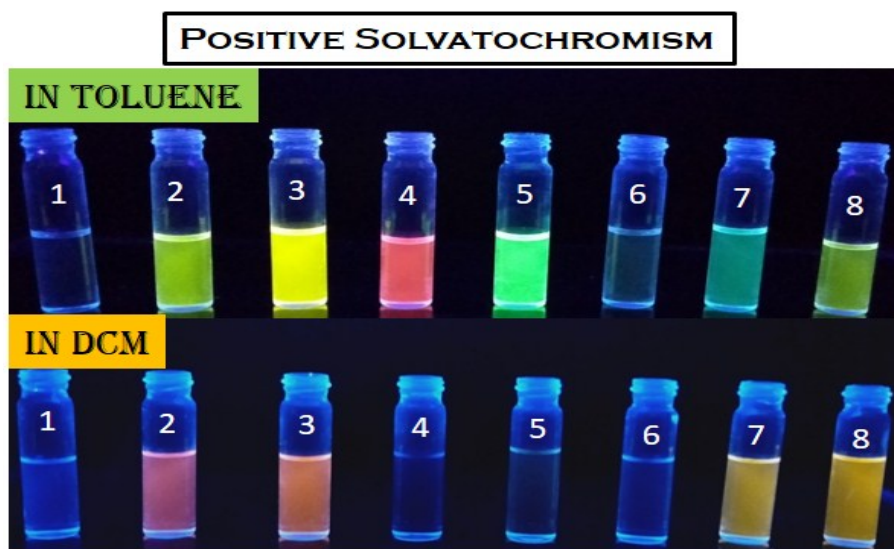

**Figure S3.** Fluorescence image of 1–8 in toluene and dichloromethane ( $10^{-6}$  M) under 365 nm UV illumination.

#### 4. Aggregation Induced Emission studies of dye 5 and 7

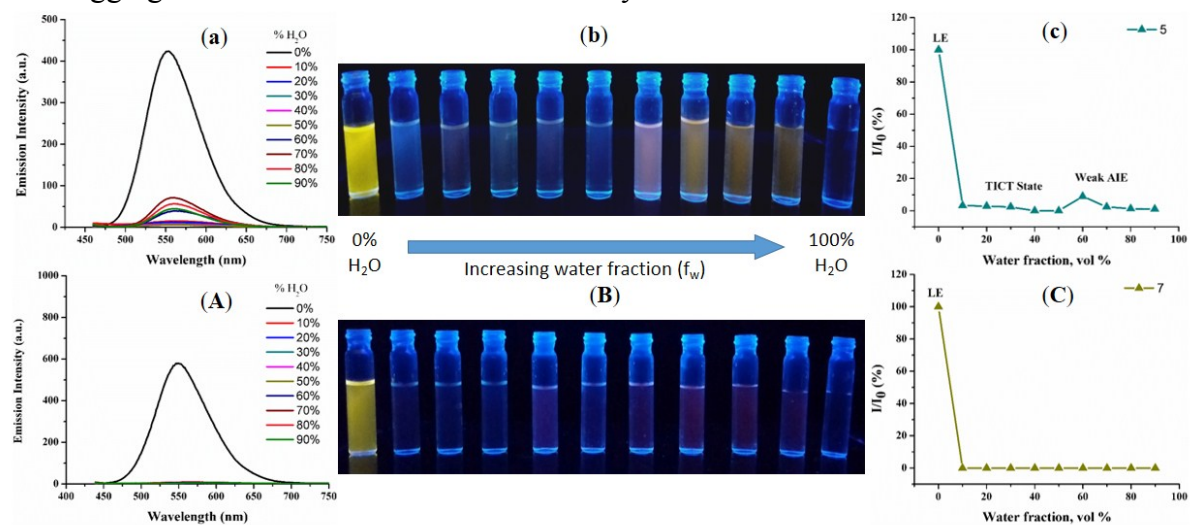

**Figure S4:** Fluorescence spectra of **5** (a) and **7** (A), photograph of **5** (b) and **7** (B) in THF–water mixture with increasing water fractions ( $f_w$ ) and **5** (c) and **7** (C) plots of PL intensity ( $I/I_0$ ) versus  $f_w$ .

## 5. Absorption Spectra of AIE studies in THF–water Mixture

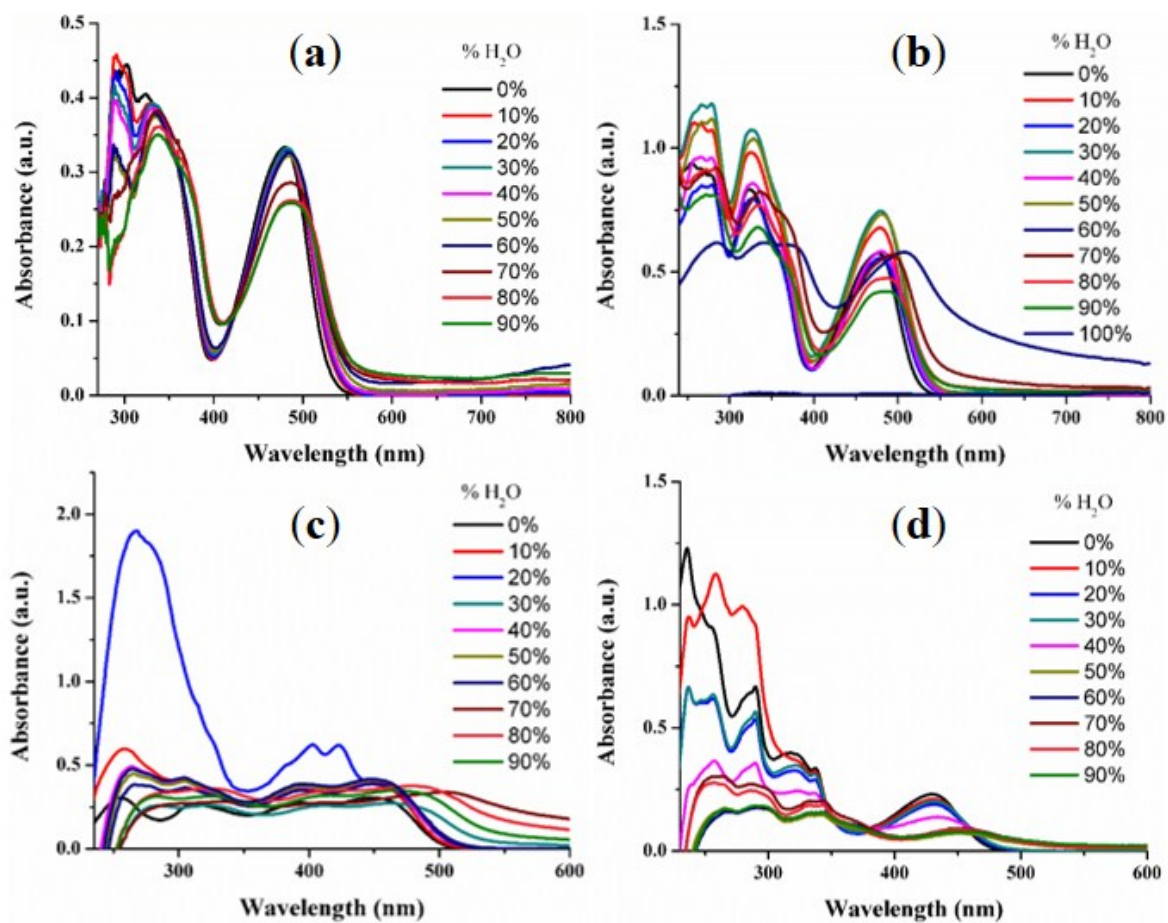

**Figure S5:** Absorption spectra in THF–water mixture in increase in water fraction by 10% ( $f_w$ ) of compound **2** (a), **3** (b), **5** (c) and **7** (d).

6. Cyclic voltammetry (CV) of compounds 1–8 in anhydrous dichloromethane

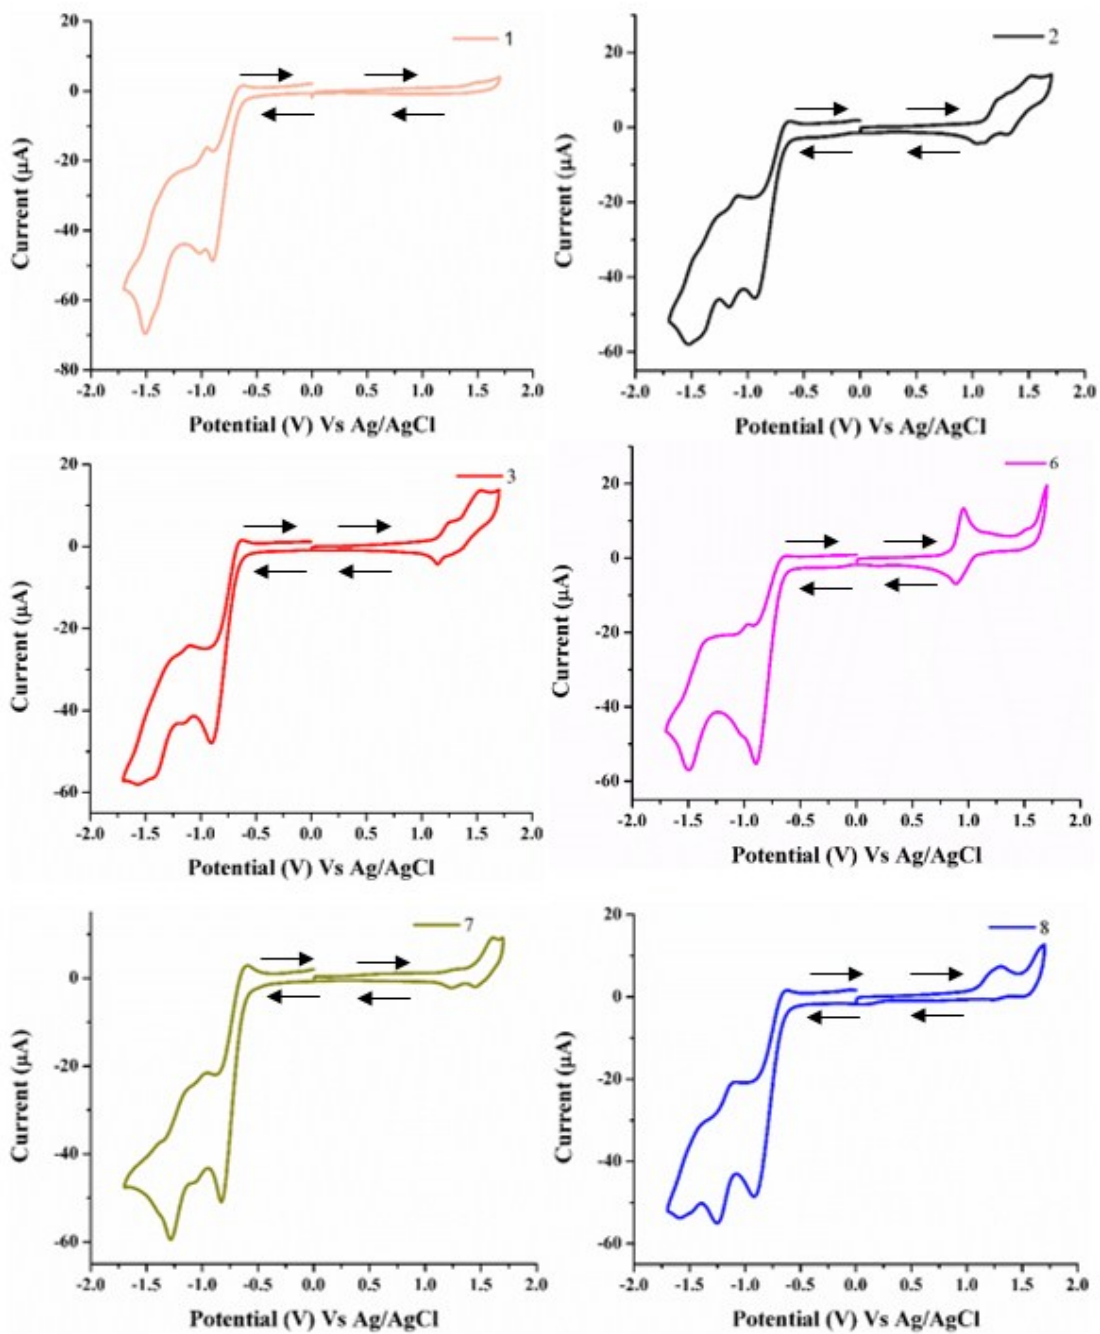

Figure S6: Cyclic voltammetry of compounds 1–3 and 6–8.



7. MALDI-TOF spectra of compounds 1-8

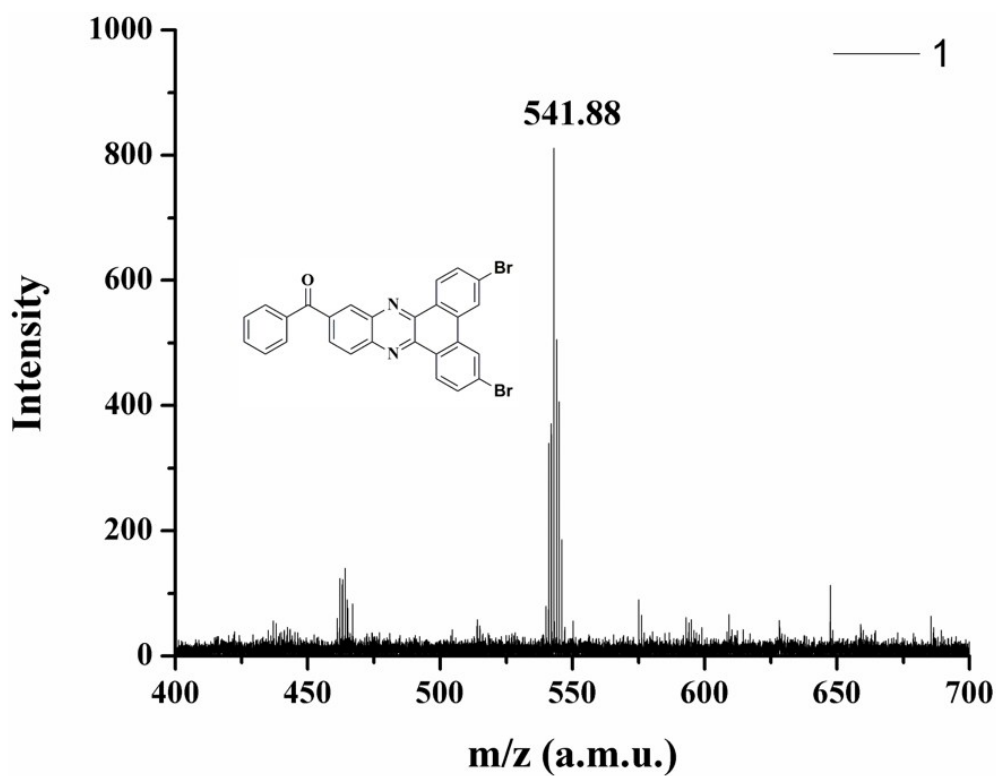

Figure S7: MALDI-TOF mass of 1.

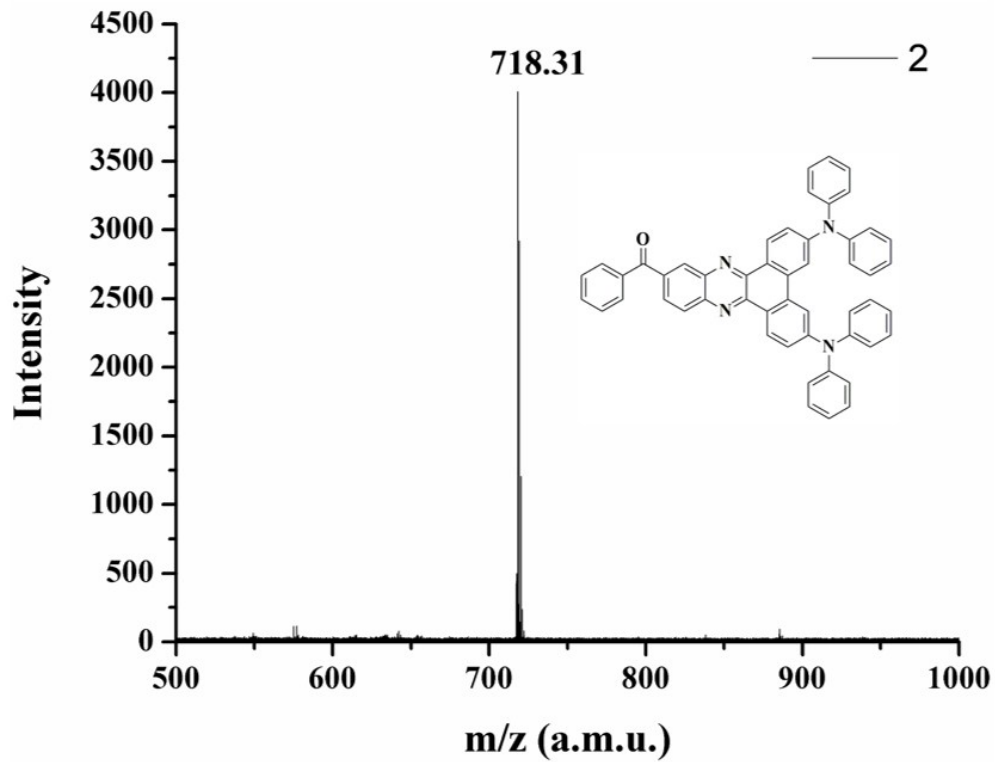

Figure S8: MALDI-TOF mass of 2.

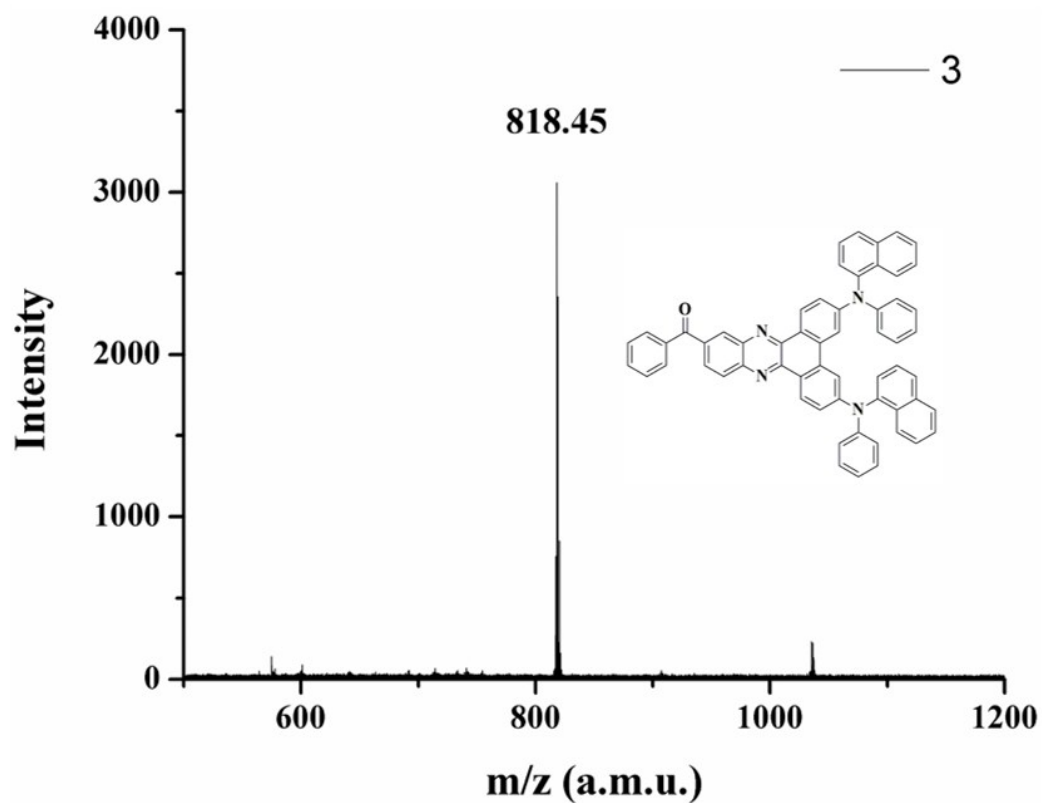

Figure S9: MALDI-TOF mass of 3.

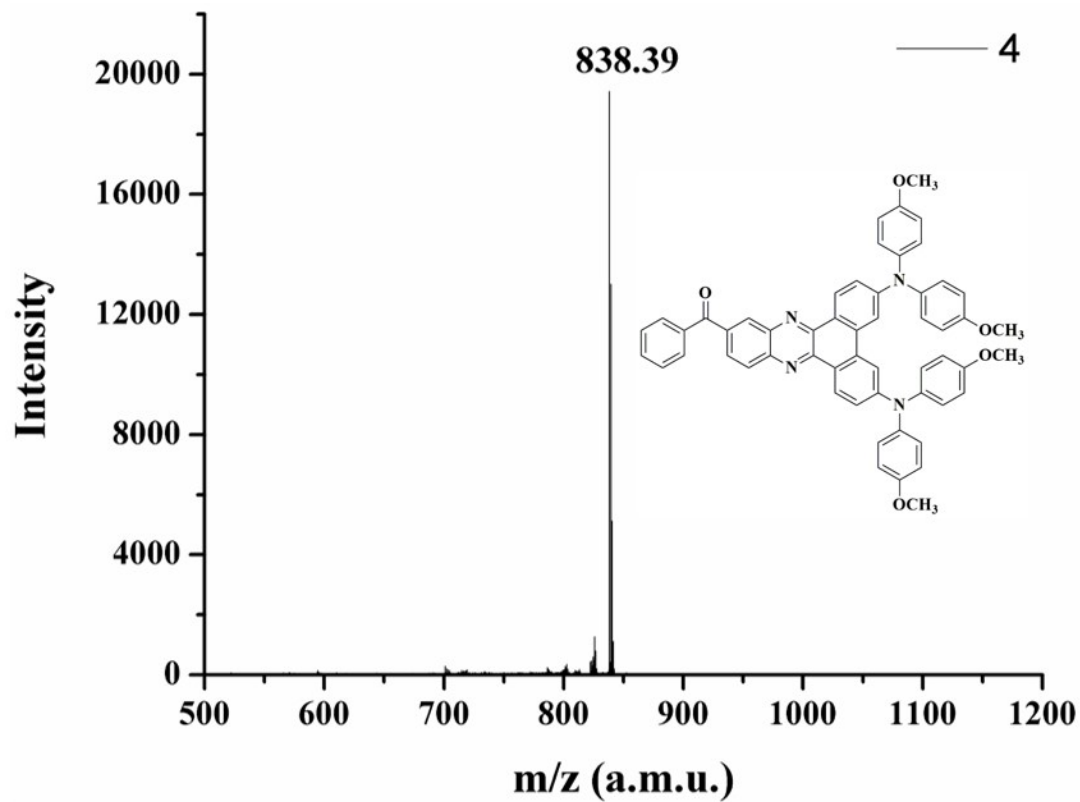

Figure S10: MALDI-TOF mass of 4.

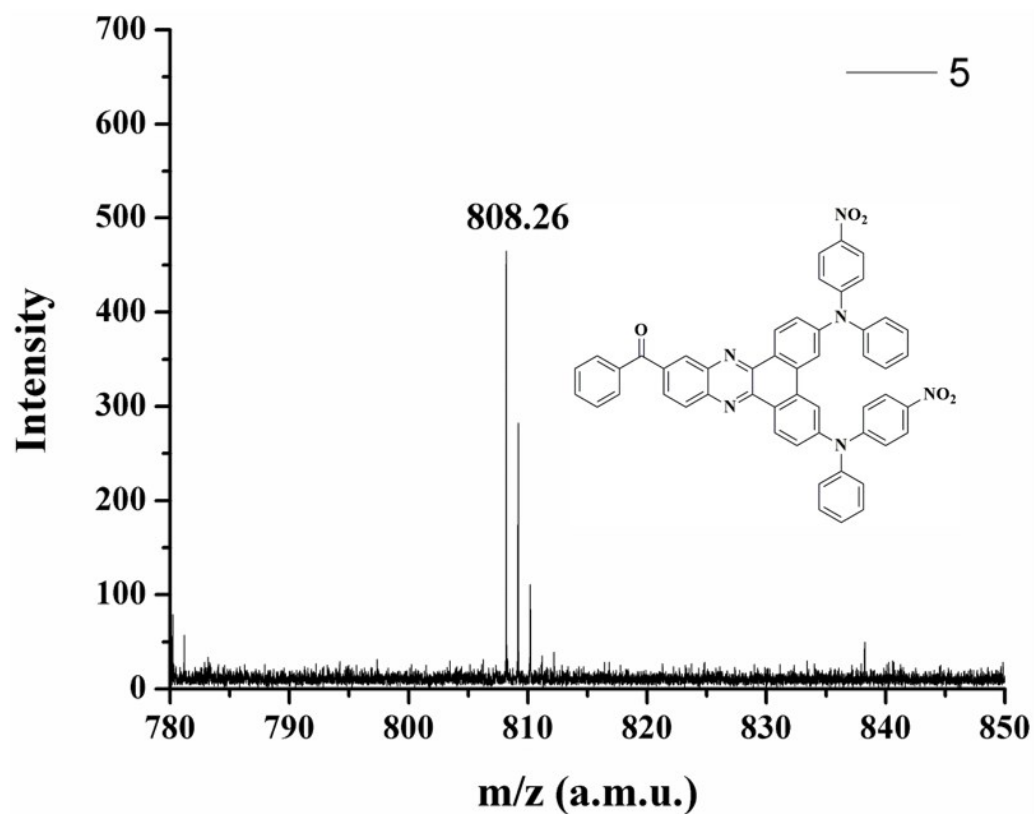

Figure S11: MALDI-TOF mass of 5.

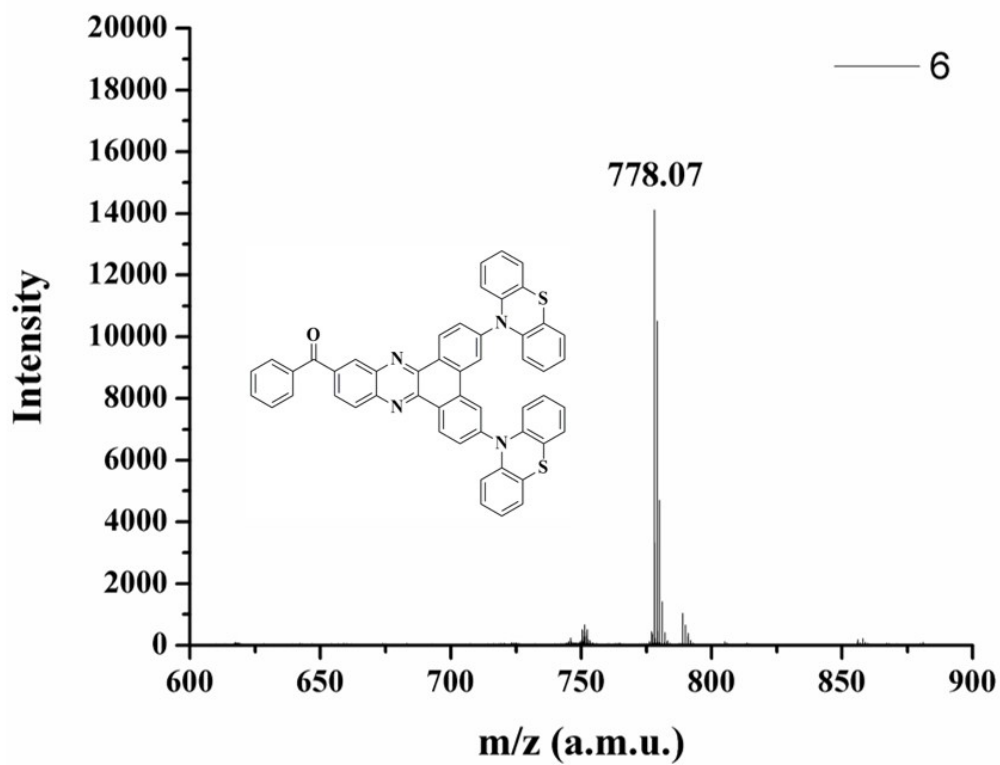

Figure S12: MALDI-TOF mass of 6.

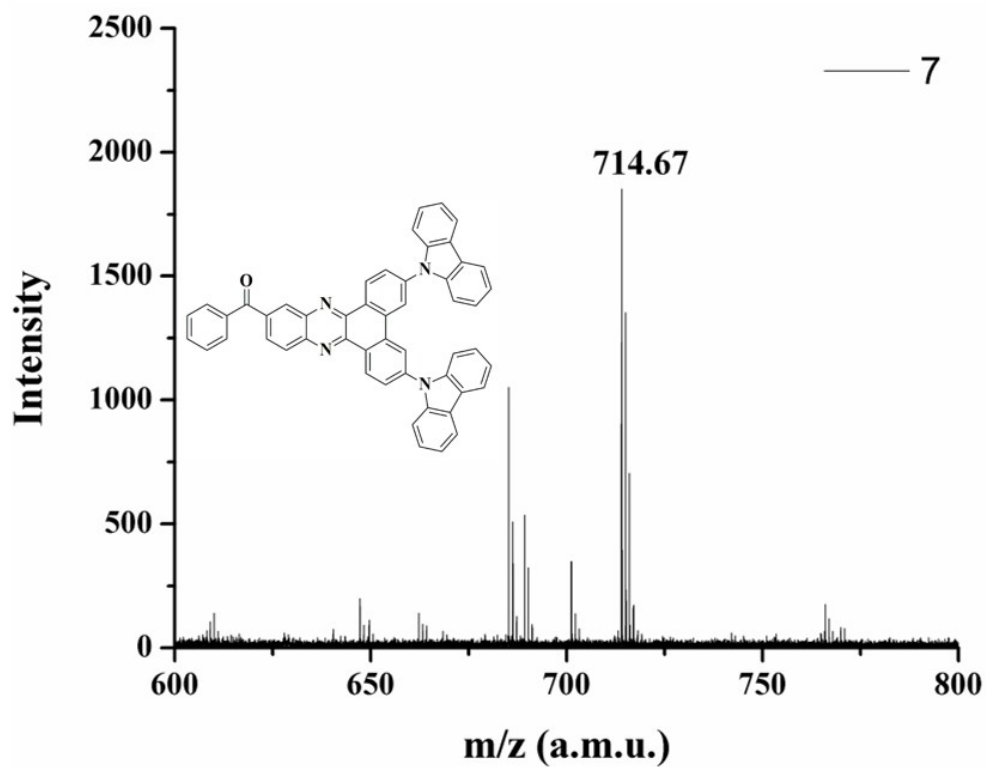

Figure S13: MALDI-TOF mass of 7.

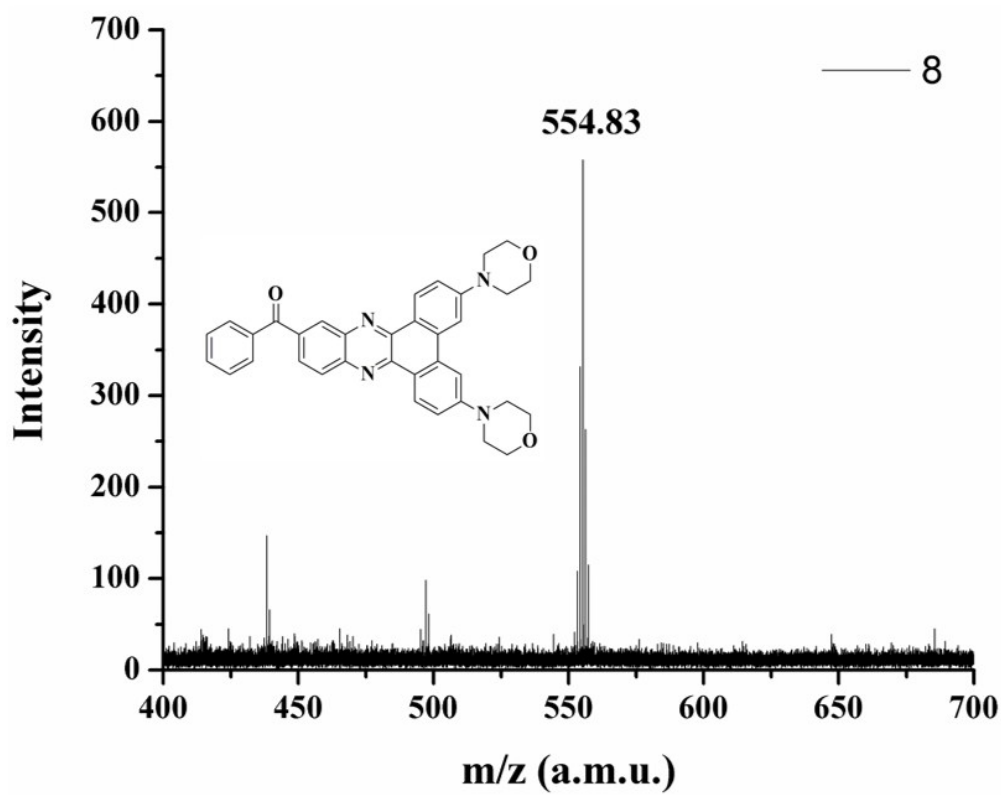

Figure S14: MALDI-TOF mass of 8.

8. FTIR spectra of compounds 1–8

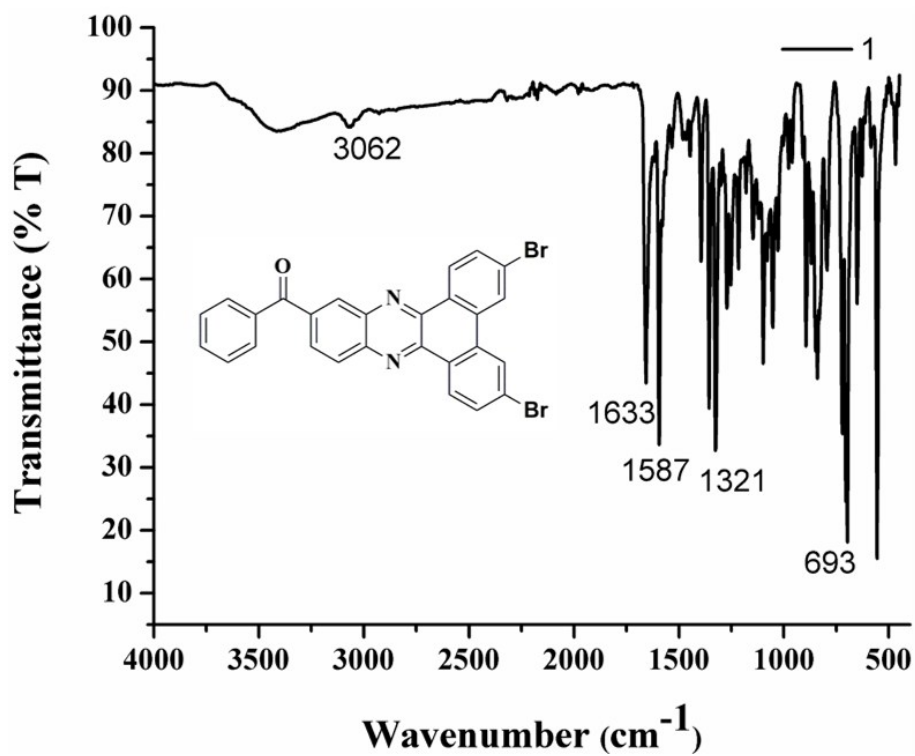

Figure S15: FTIR spectra of 1.

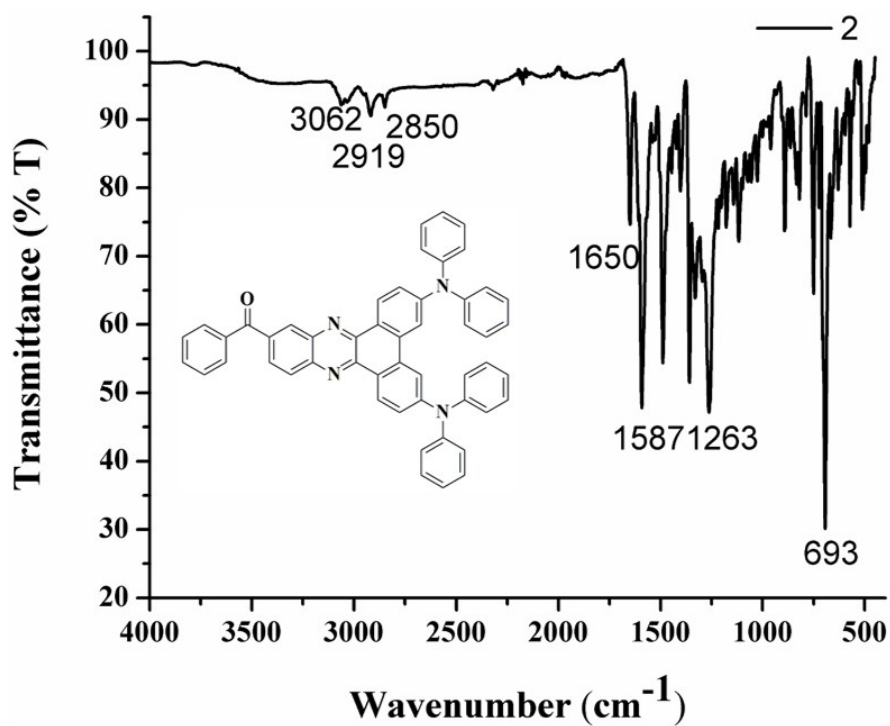

Figure S16: FTIR spectra of 2.

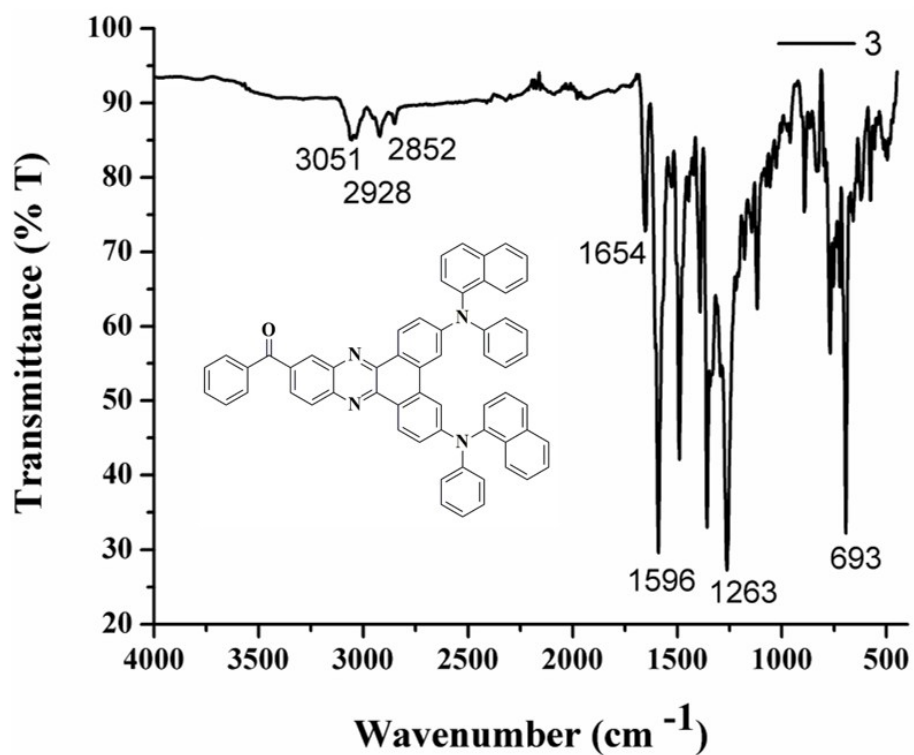

Figure S17: FTIR spectra of 3.

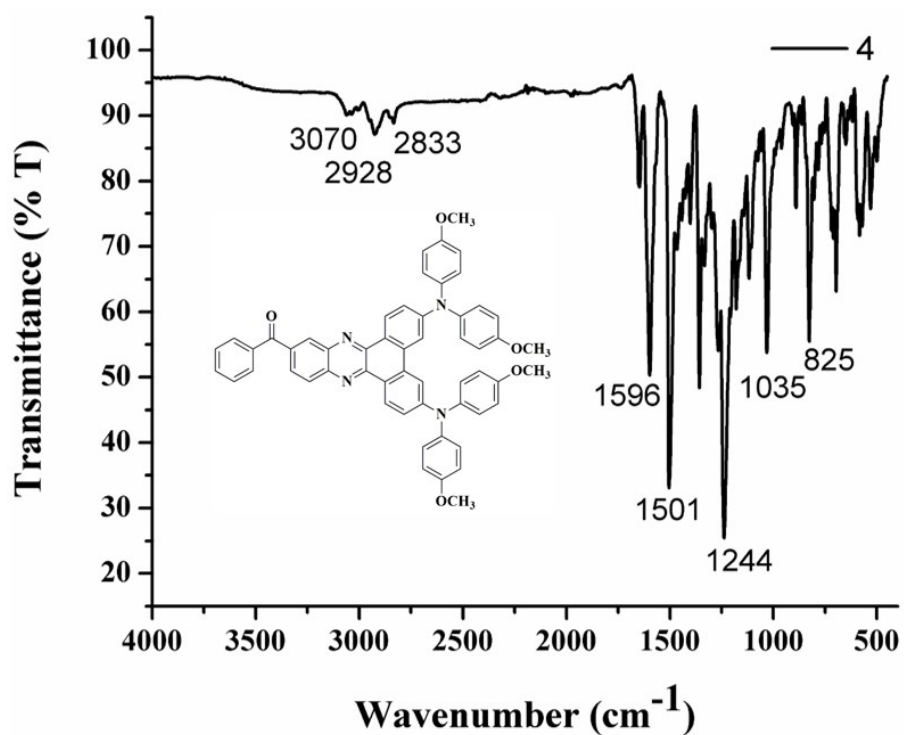

Figure S18: FTIR spectra of 4.

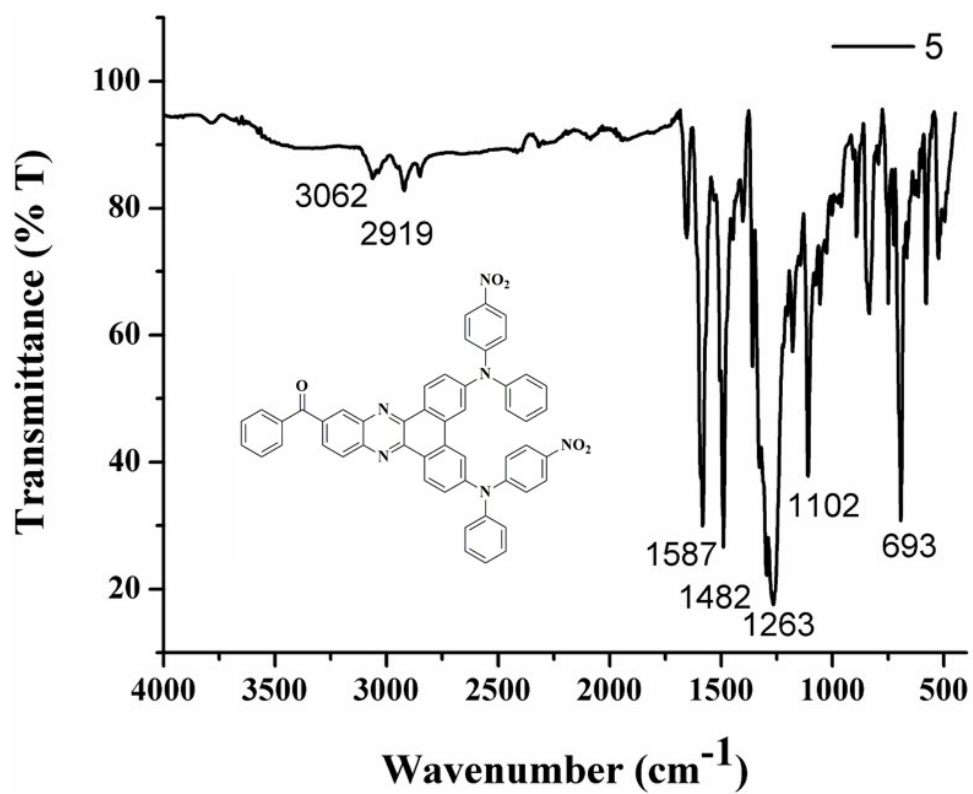

Figure S19: FTIR spectra of **5**.

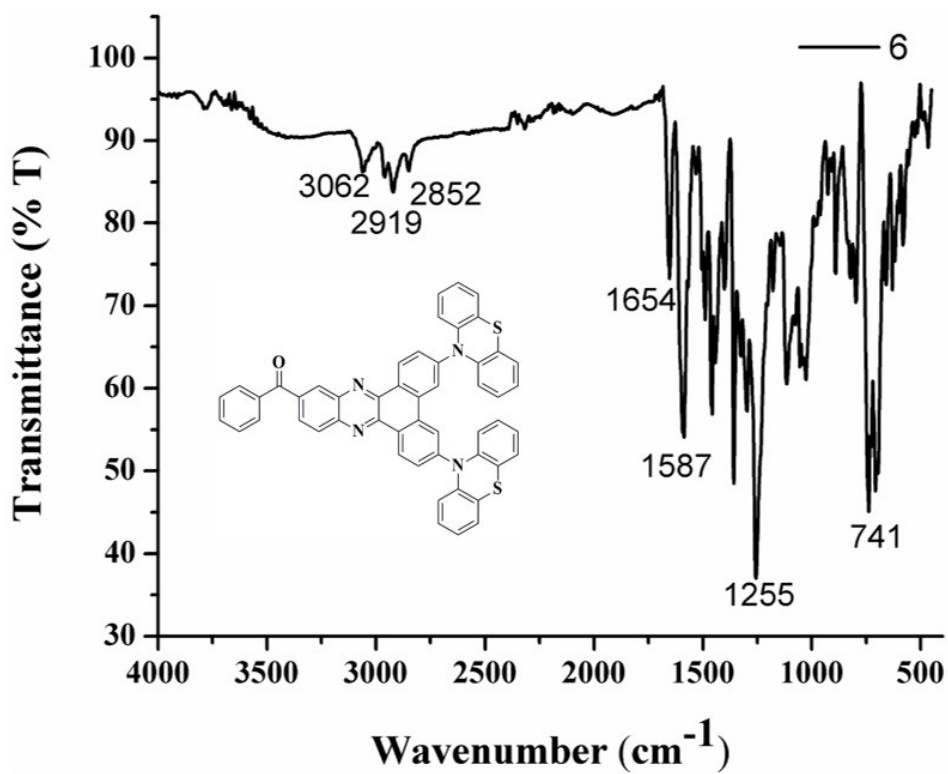

Figure S20: FTIR spectra of **6**.

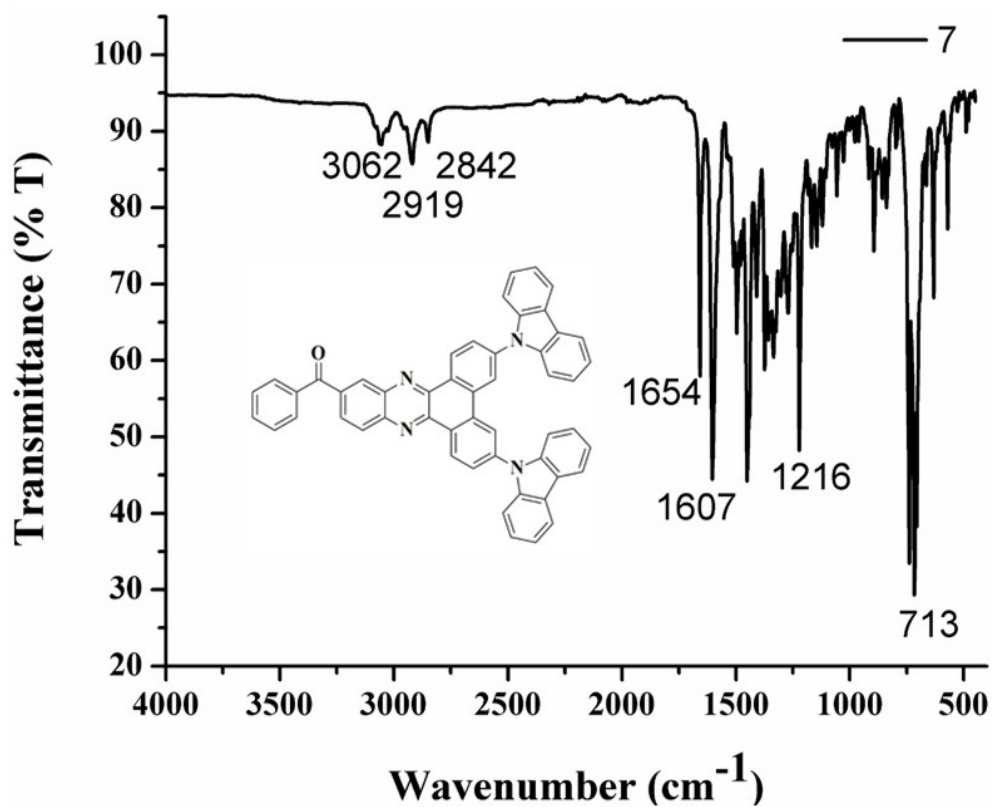

Figure S21: FTIR spectra of 7.

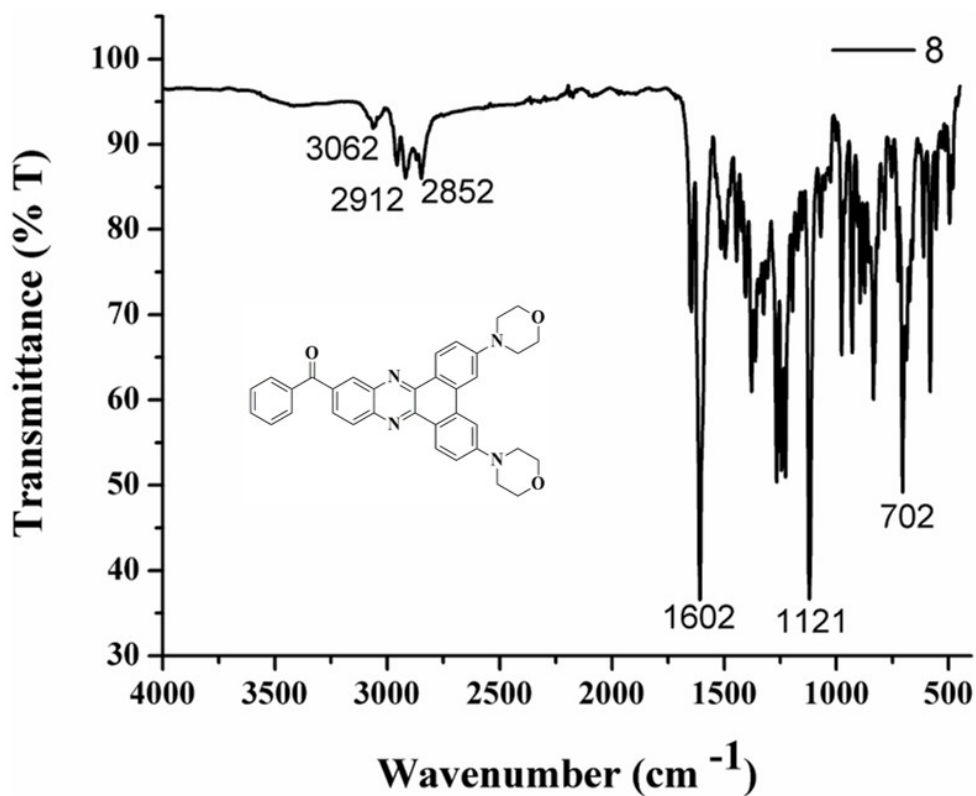

Figure S22: FTIR spectra of 8.



9.  $^1\text{H}$  and  $^{13}\text{C}$  NMR spectra of compounds 1-8

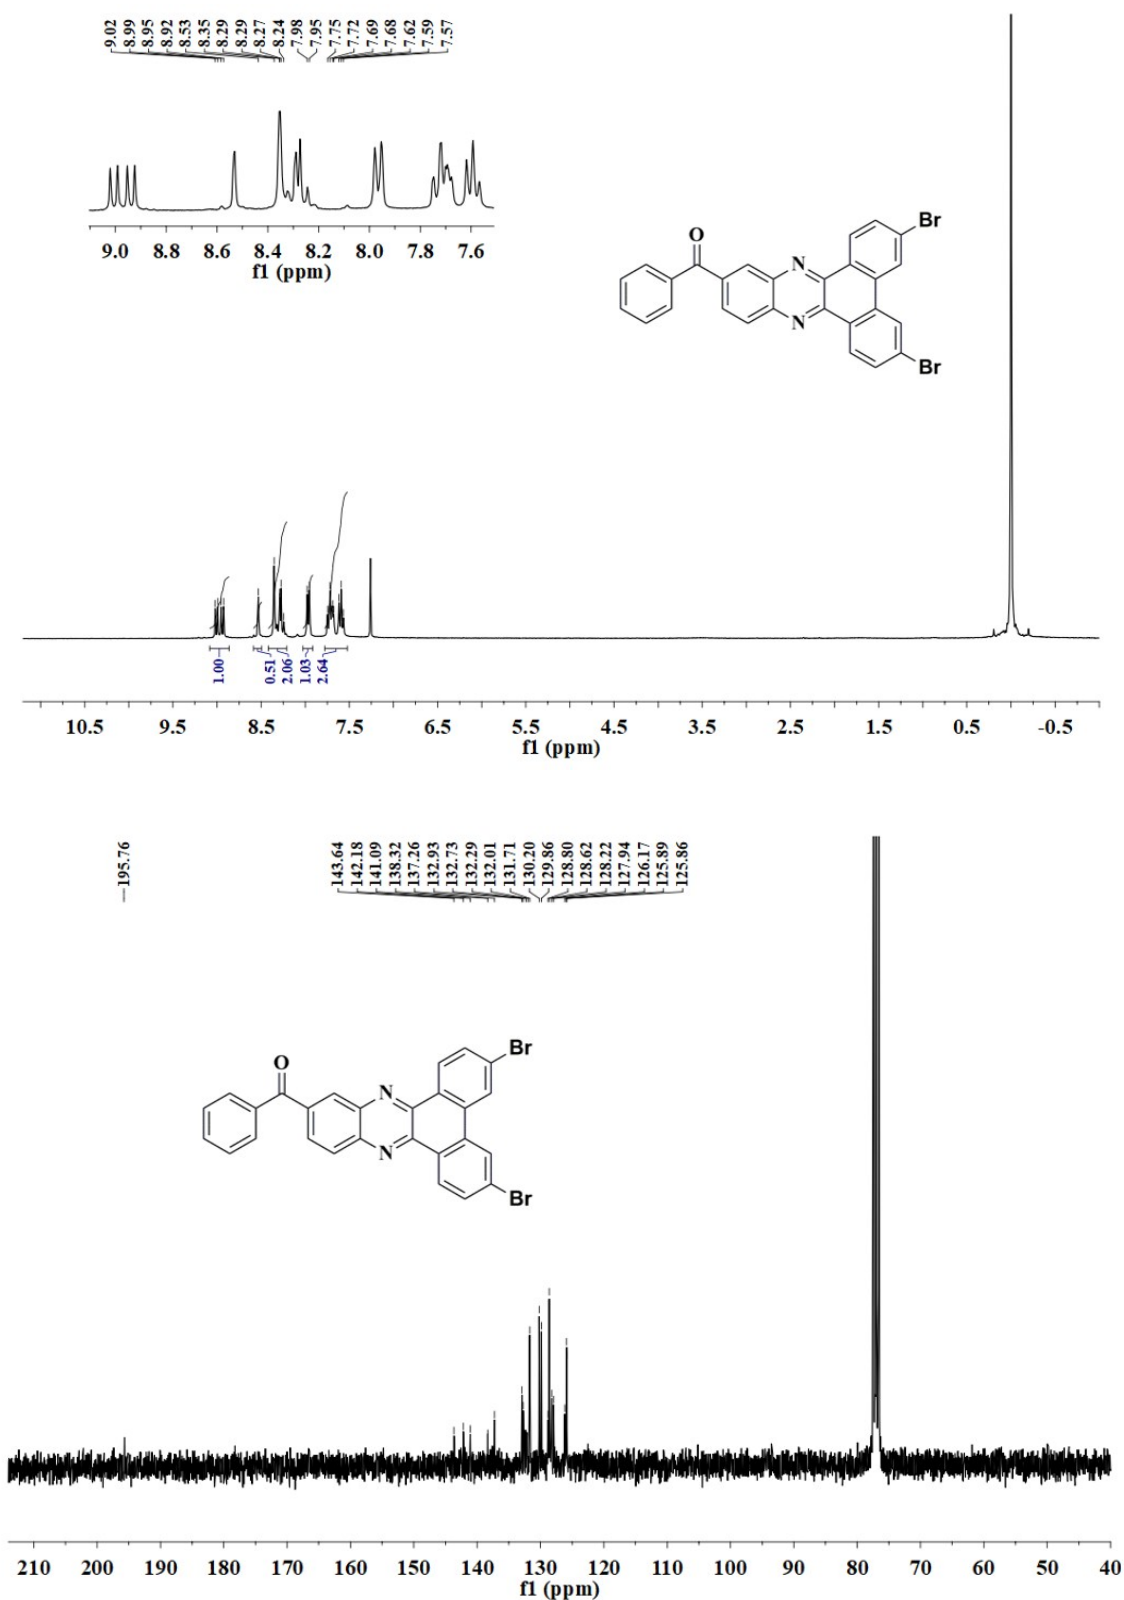

Figure S23:  $^1\text{H}$ -NMR (above) and  $^{13}\text{C}$ -NMR (below) spectra in  $\text{CDCl}_3$  of compound 1.

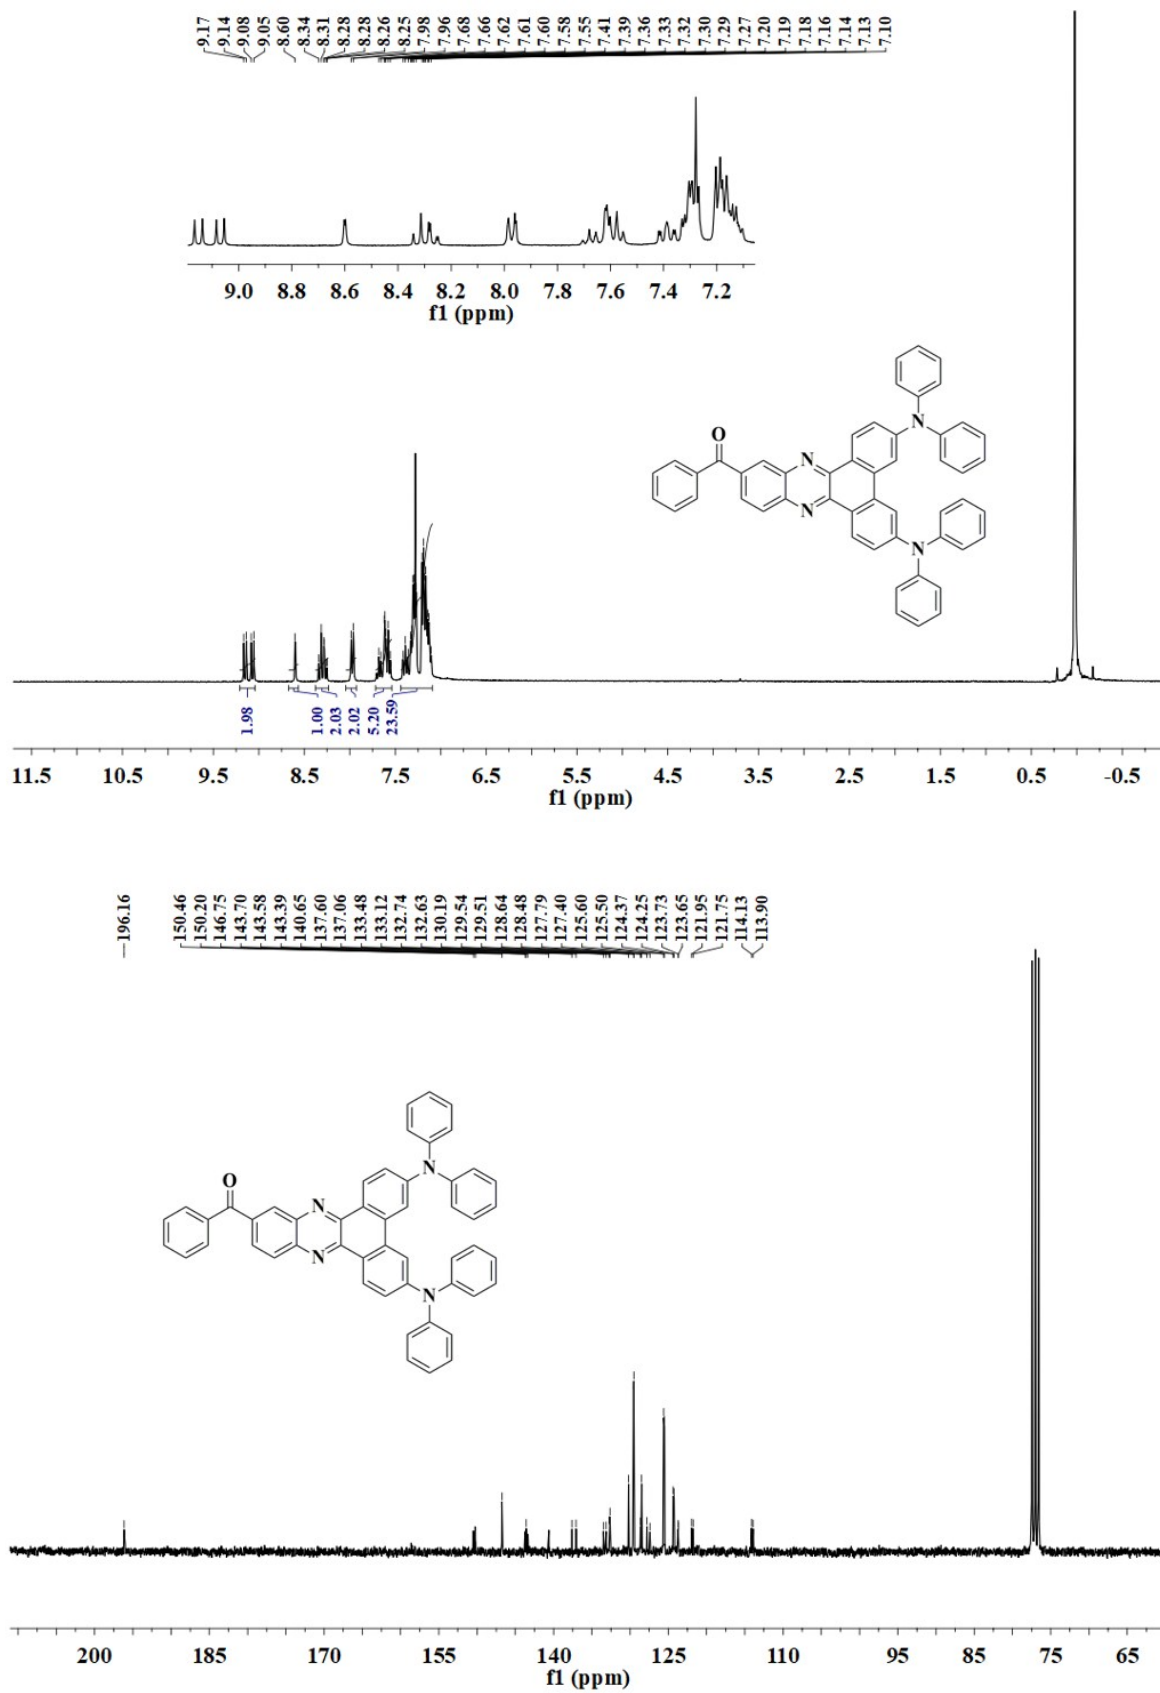

**Figure S24:**  $^1\text{H-NMR}$  (above) and  $^{13}\text{C-NMR}$  (below) spectra in  $\text{CDCl}_3$  of compound 2.

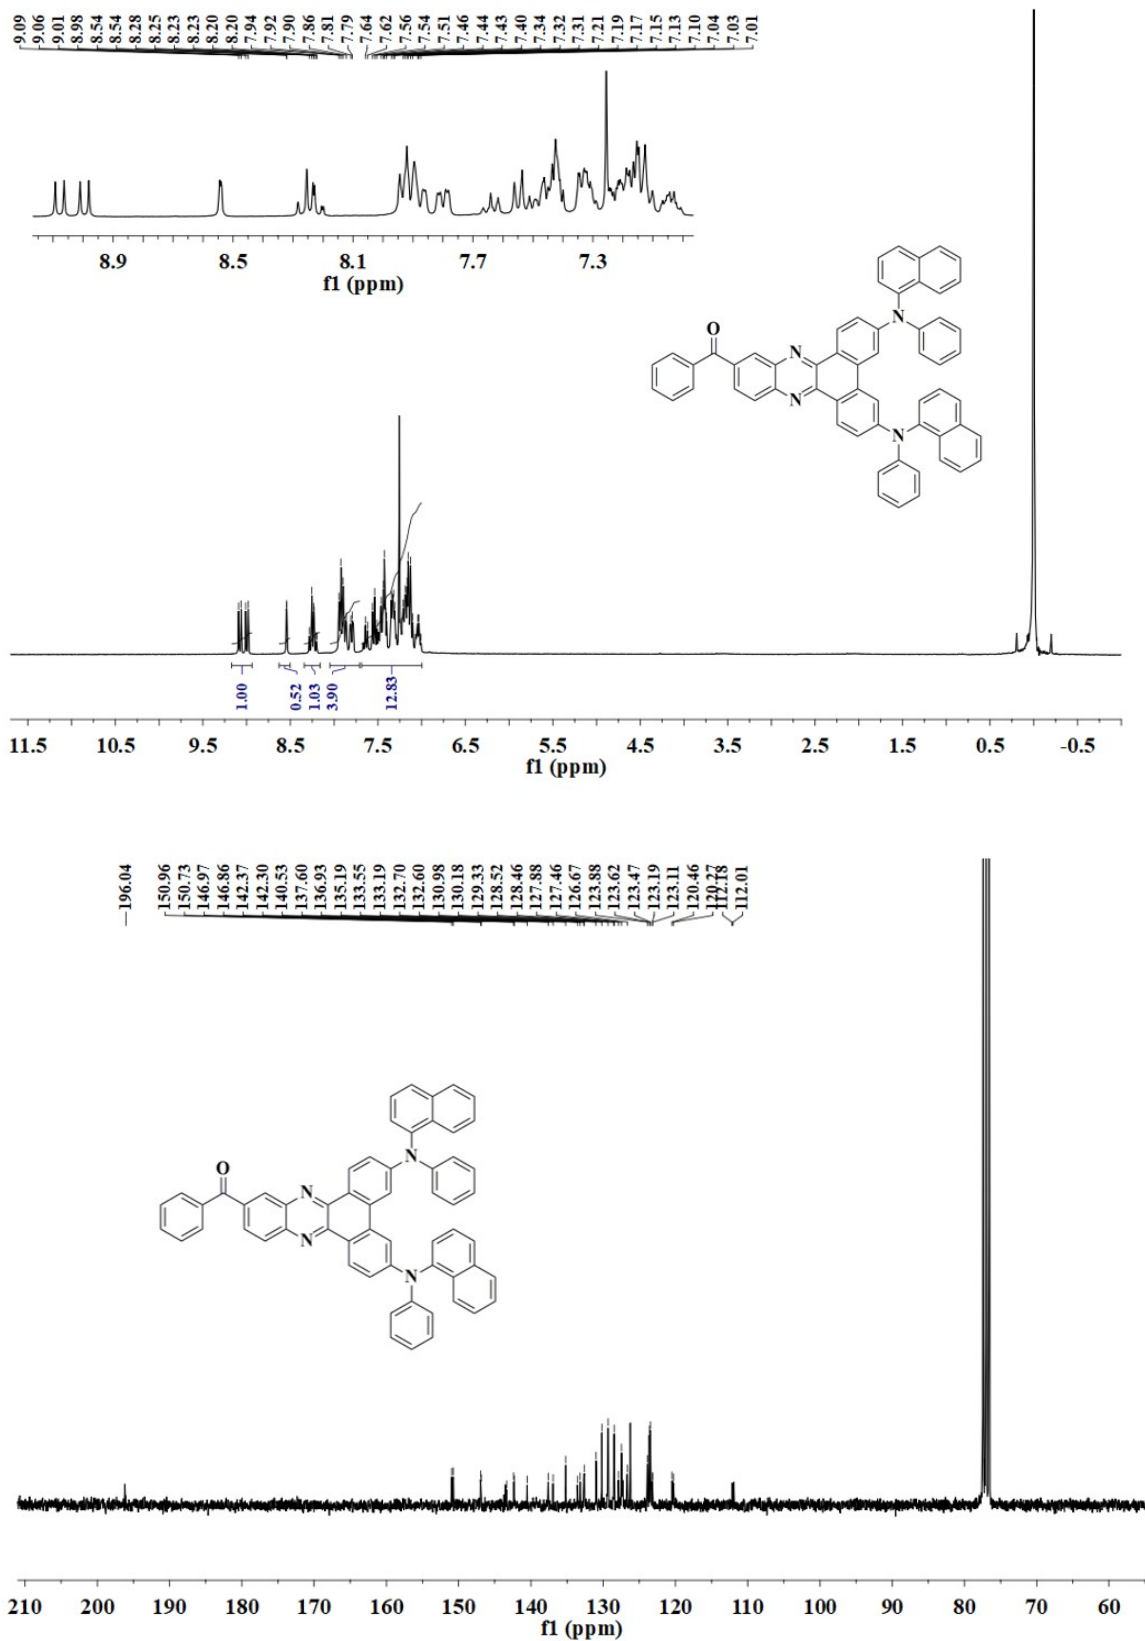

**Figure S25:** <sup>1</sup>H-NMR (above) and <sup>13</sup>C-NMR (below) spectra in CDCl<sub>3</sub> of compound **3**.

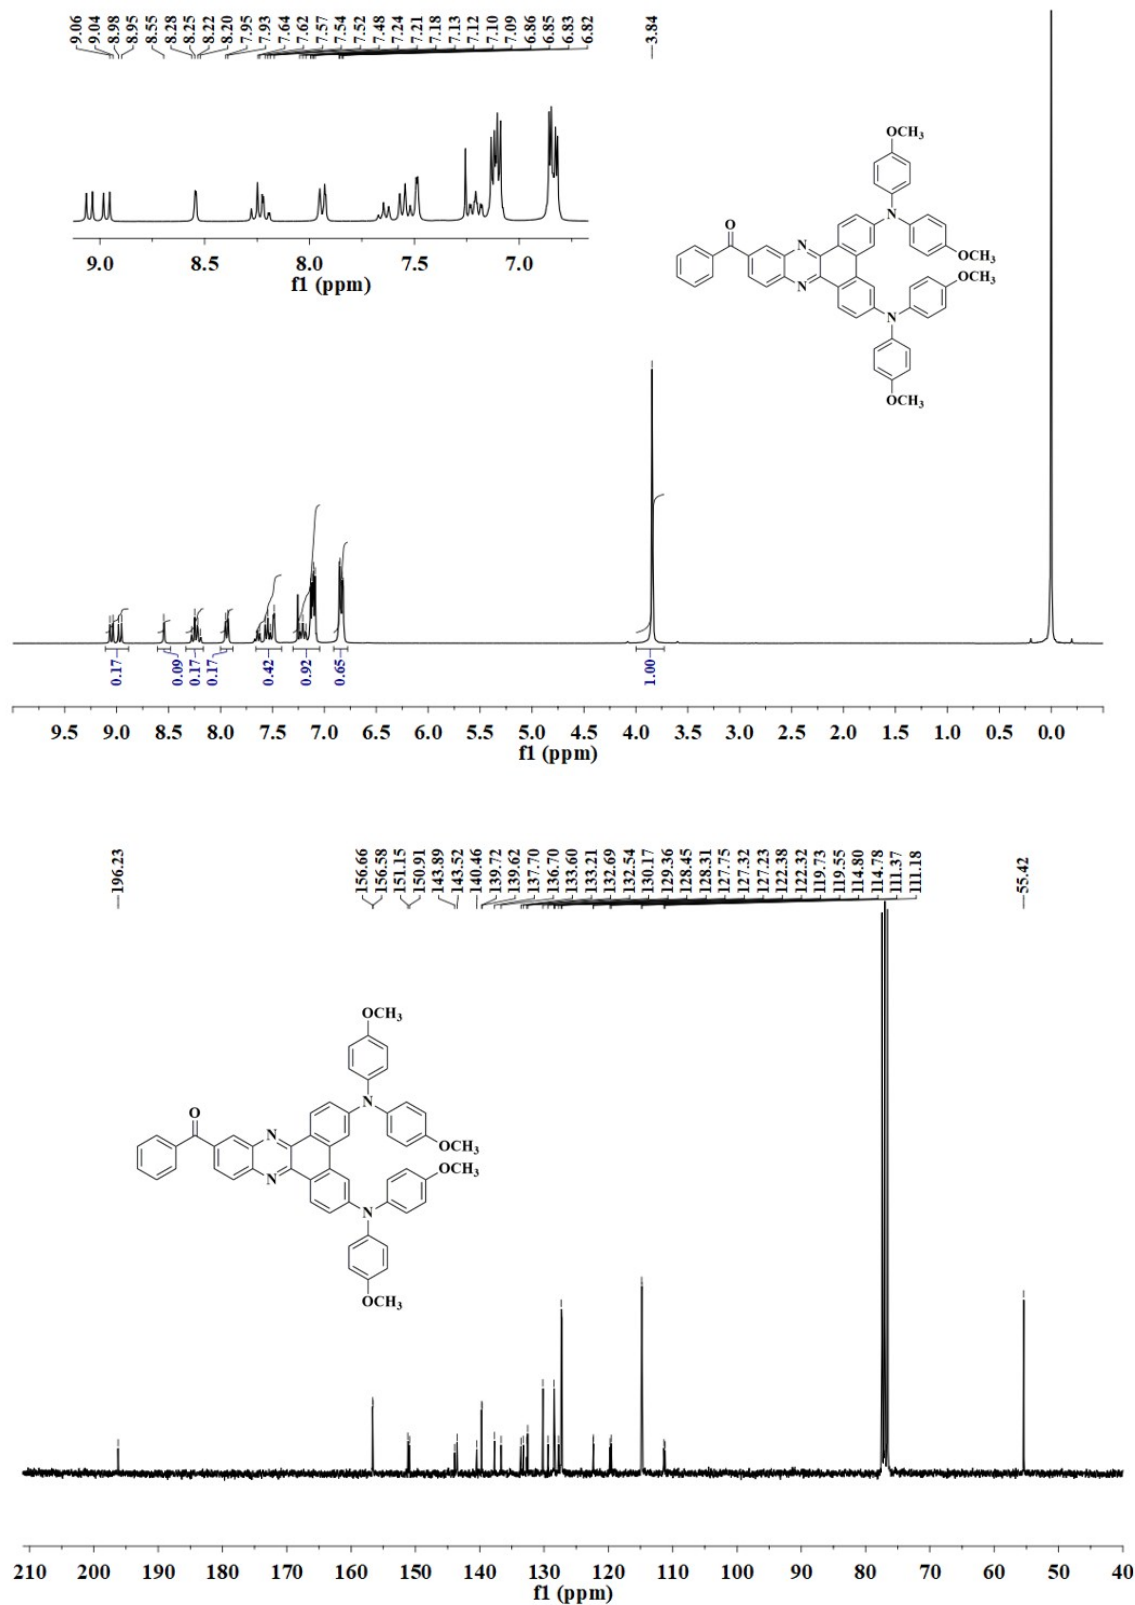

Figure S26: <sup>1</sup>H-NMR (above) and <sup>13</sup>C-NMR (below) spectra in CDCl<sub>3</sub> of compound 4.

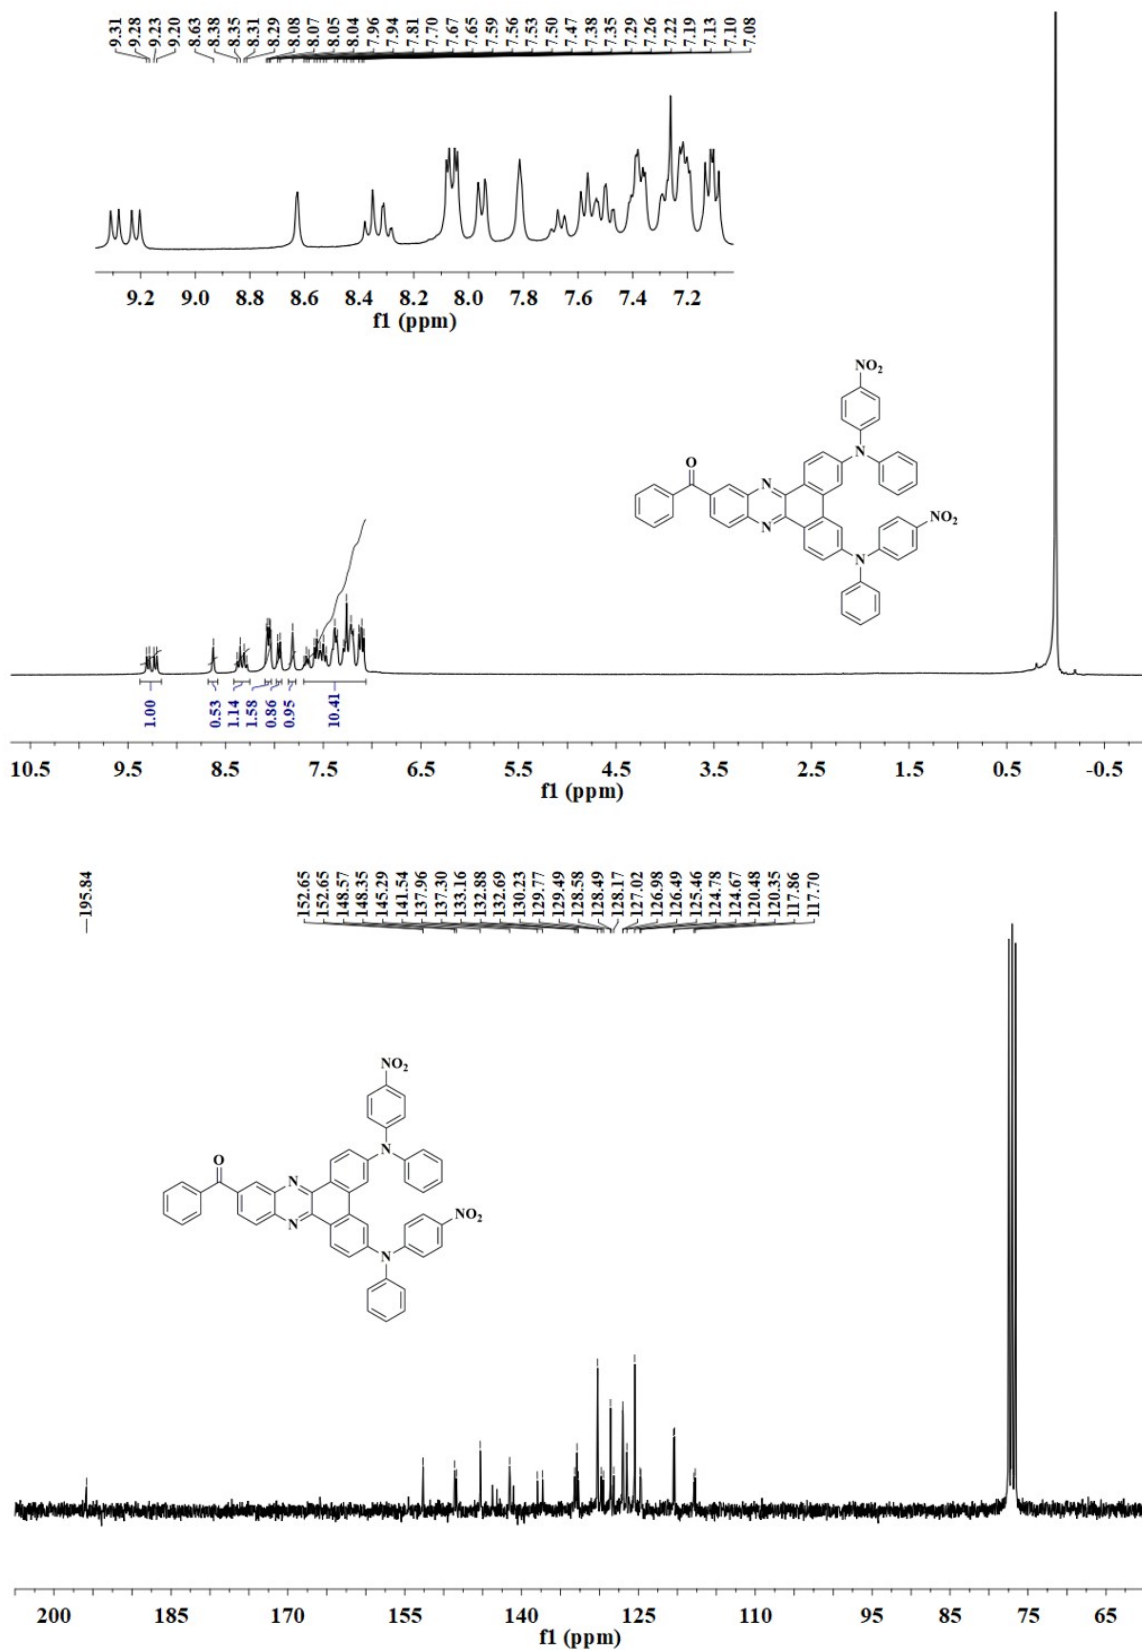

**Figure S27:** <sup>1</sup>H-NMR (above) and <sup>13</sup>C-NMR (below) spectra in CDCl<sub>3</sub> of compound 5.

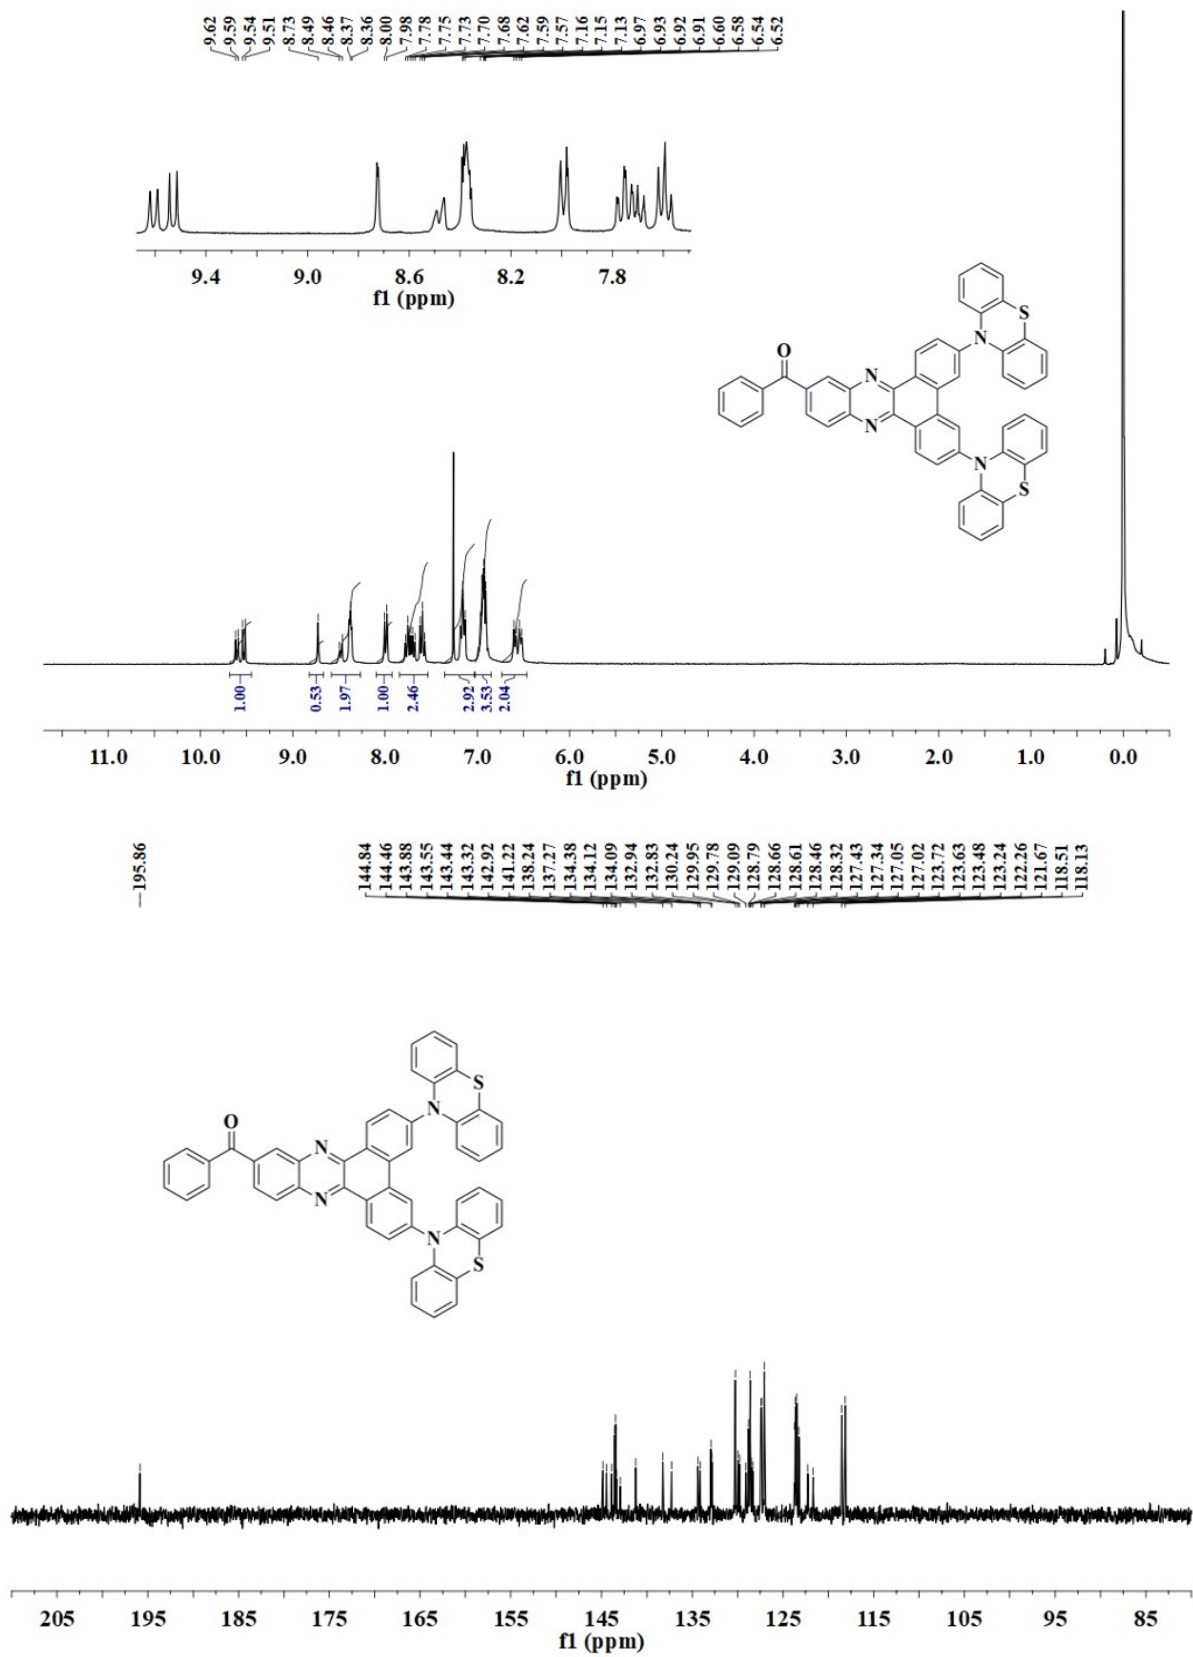

**Figure S28:** <sup>1</sup>H-NMR (above) and <sup>13</sup>C-NMR (below) spectra in CDCl<sub>3</sub> of compound 6.

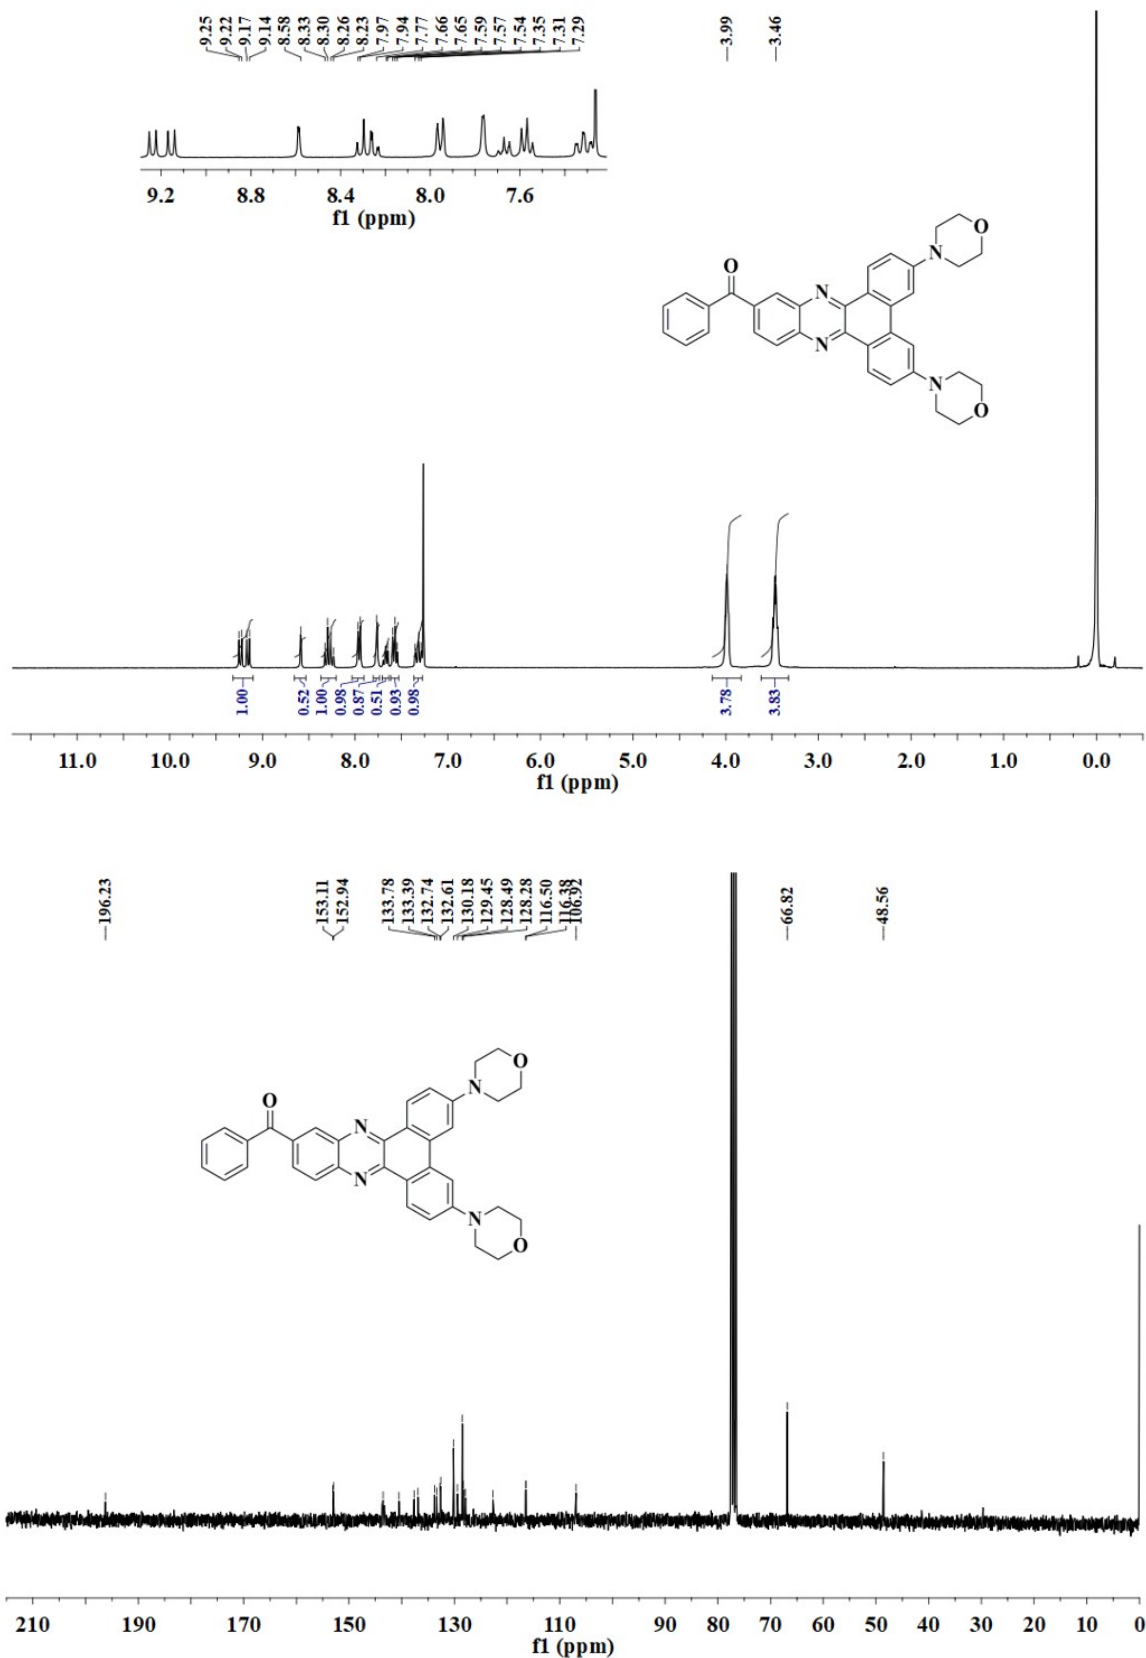

**Figure S29:** <sup>1</sup>H-NMR (above) and <sup>13</sup>C-NMR (below) spectra in CDCl<sub>3</sub> of compound **8**.

10. Optimized structures of compounds 1-8

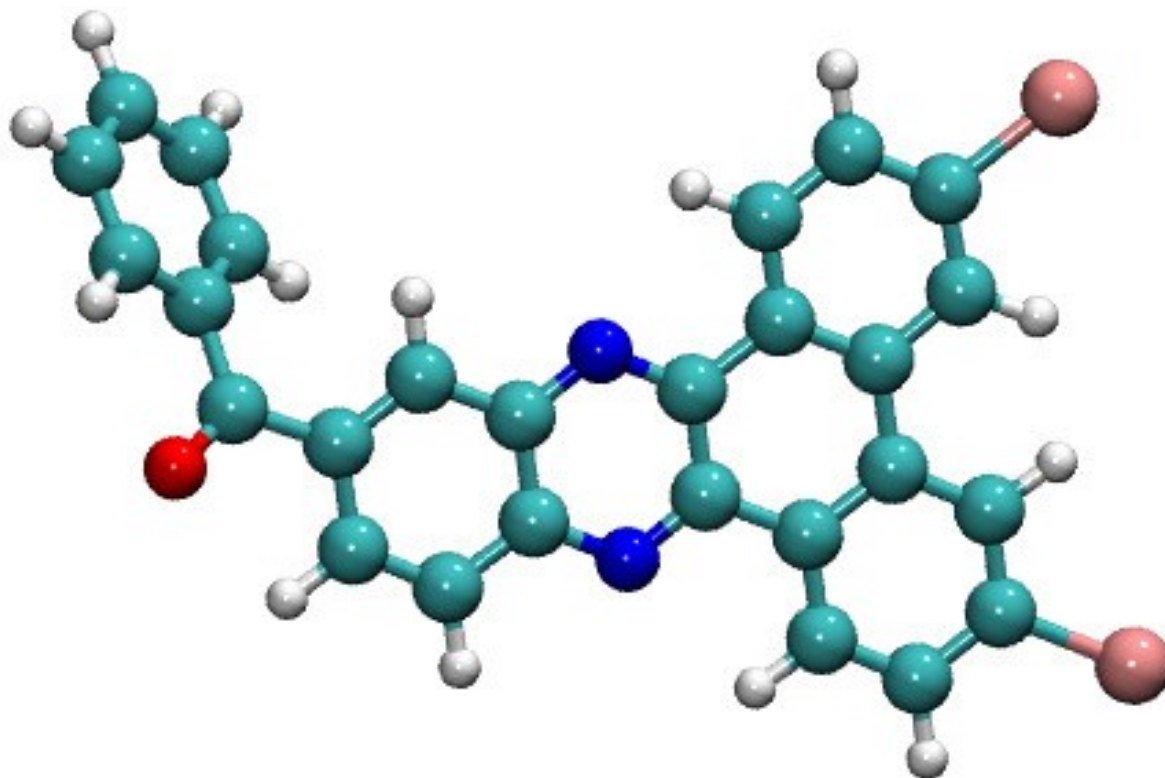

Figure S30: Optimized structures of compound 1.



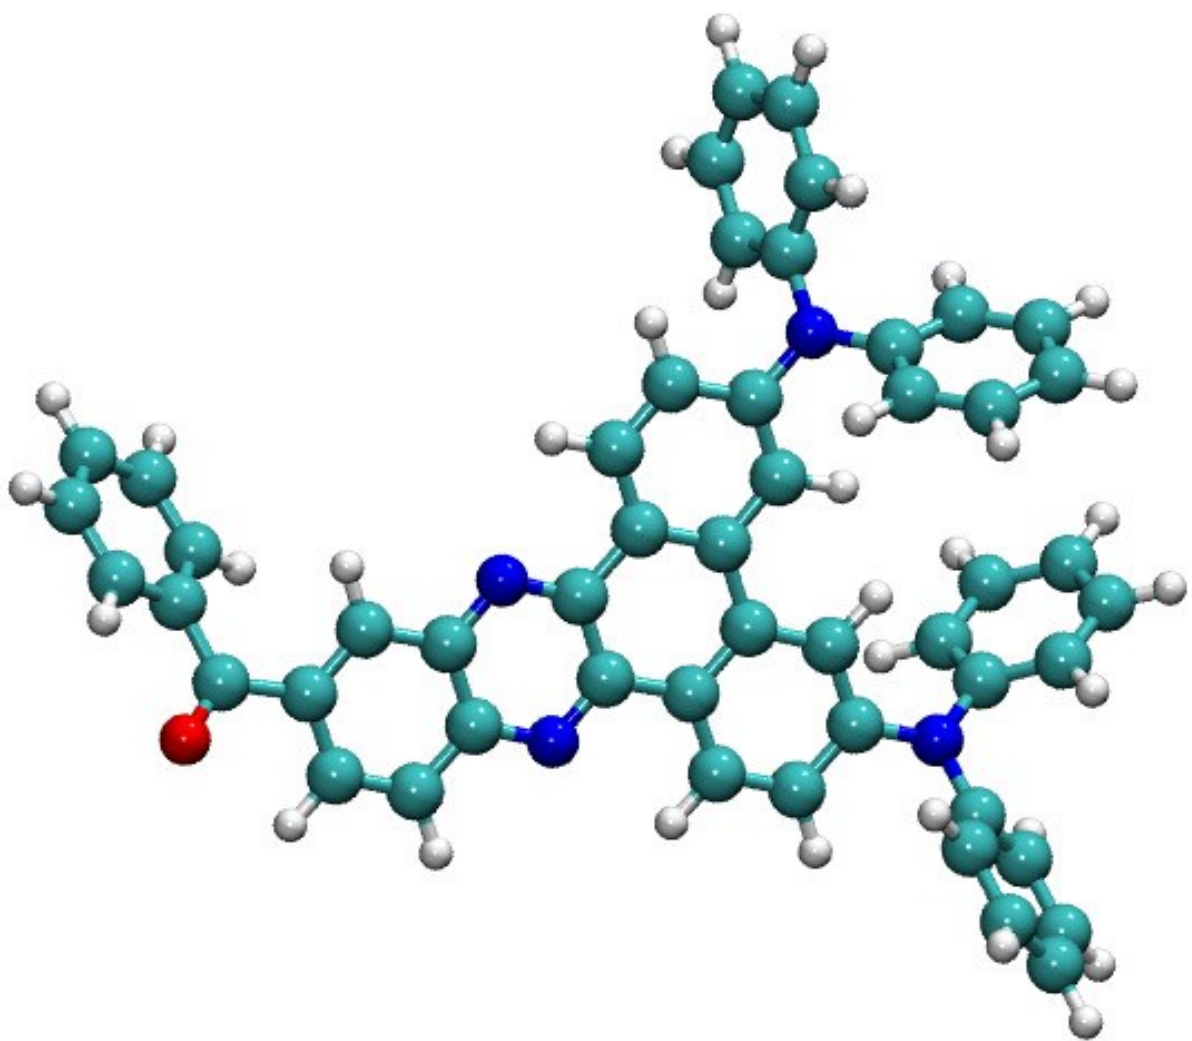

**Figure S31:** Optimized structures of compound 2.

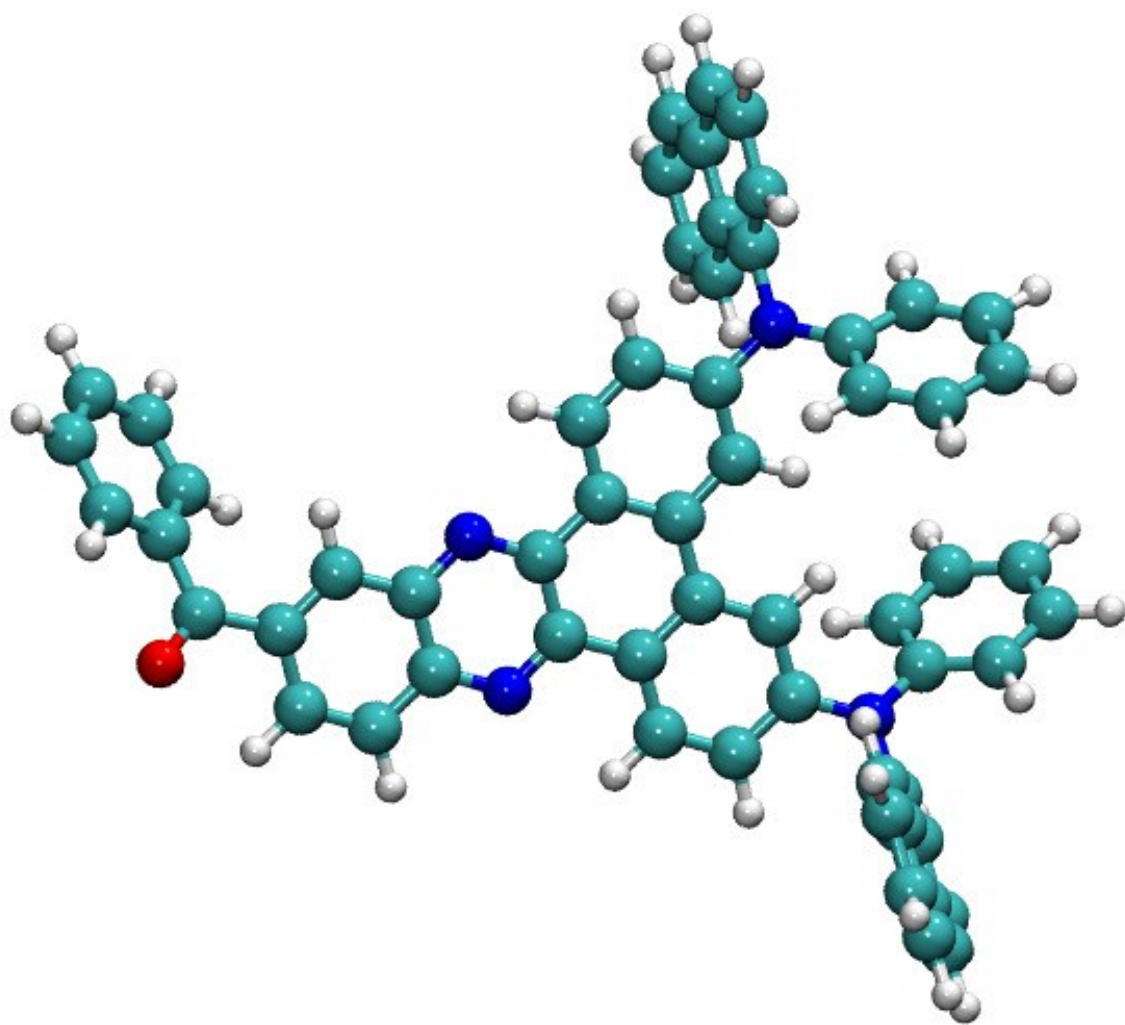

**Figure S32:** Optimized structures of compound 3.

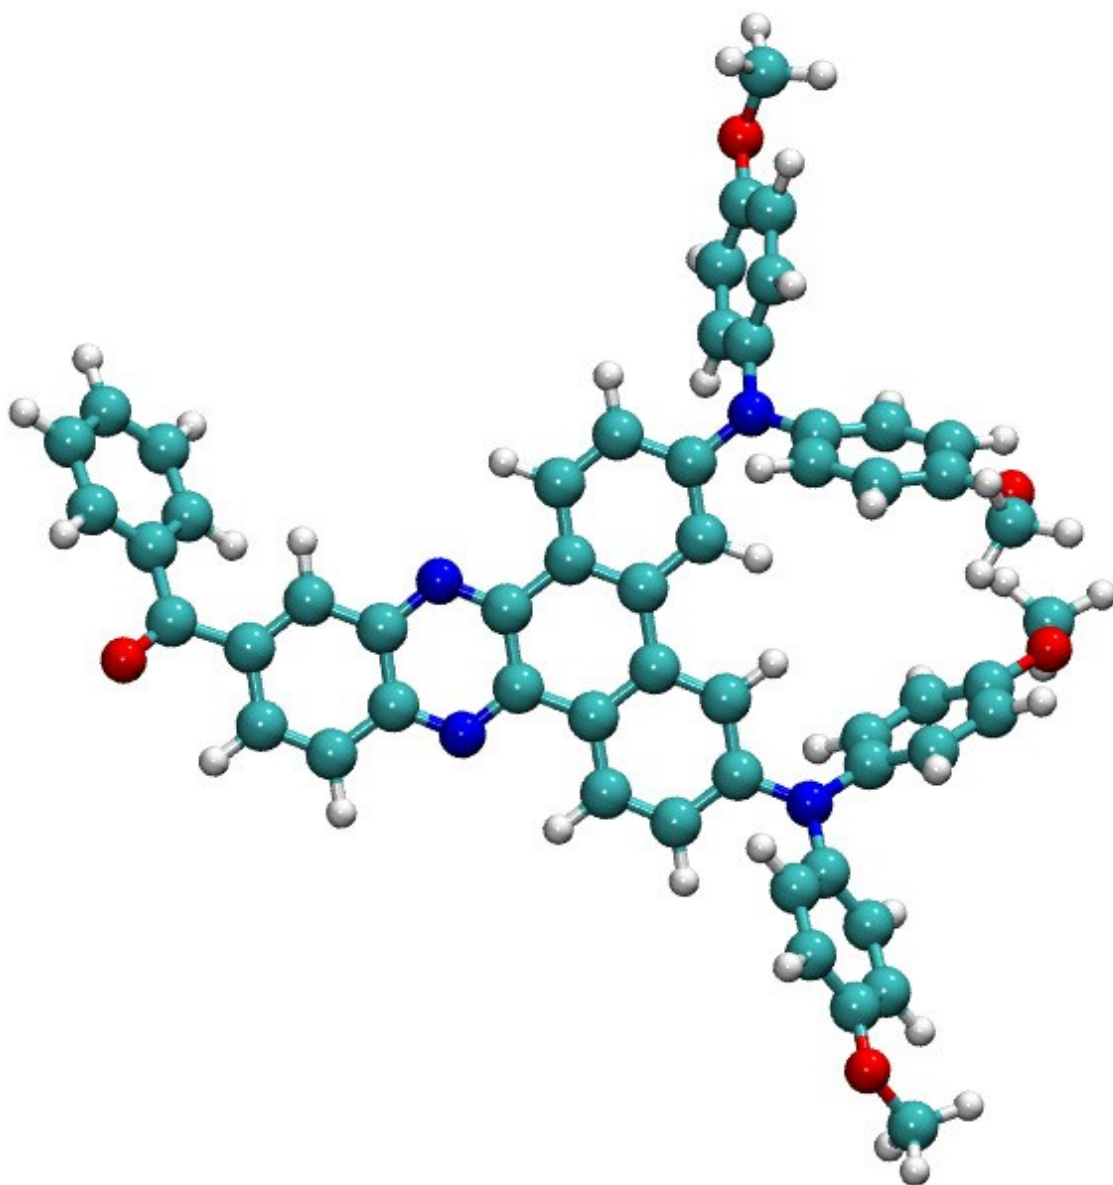

**Figure S33:** Optimized structures of compound 4.

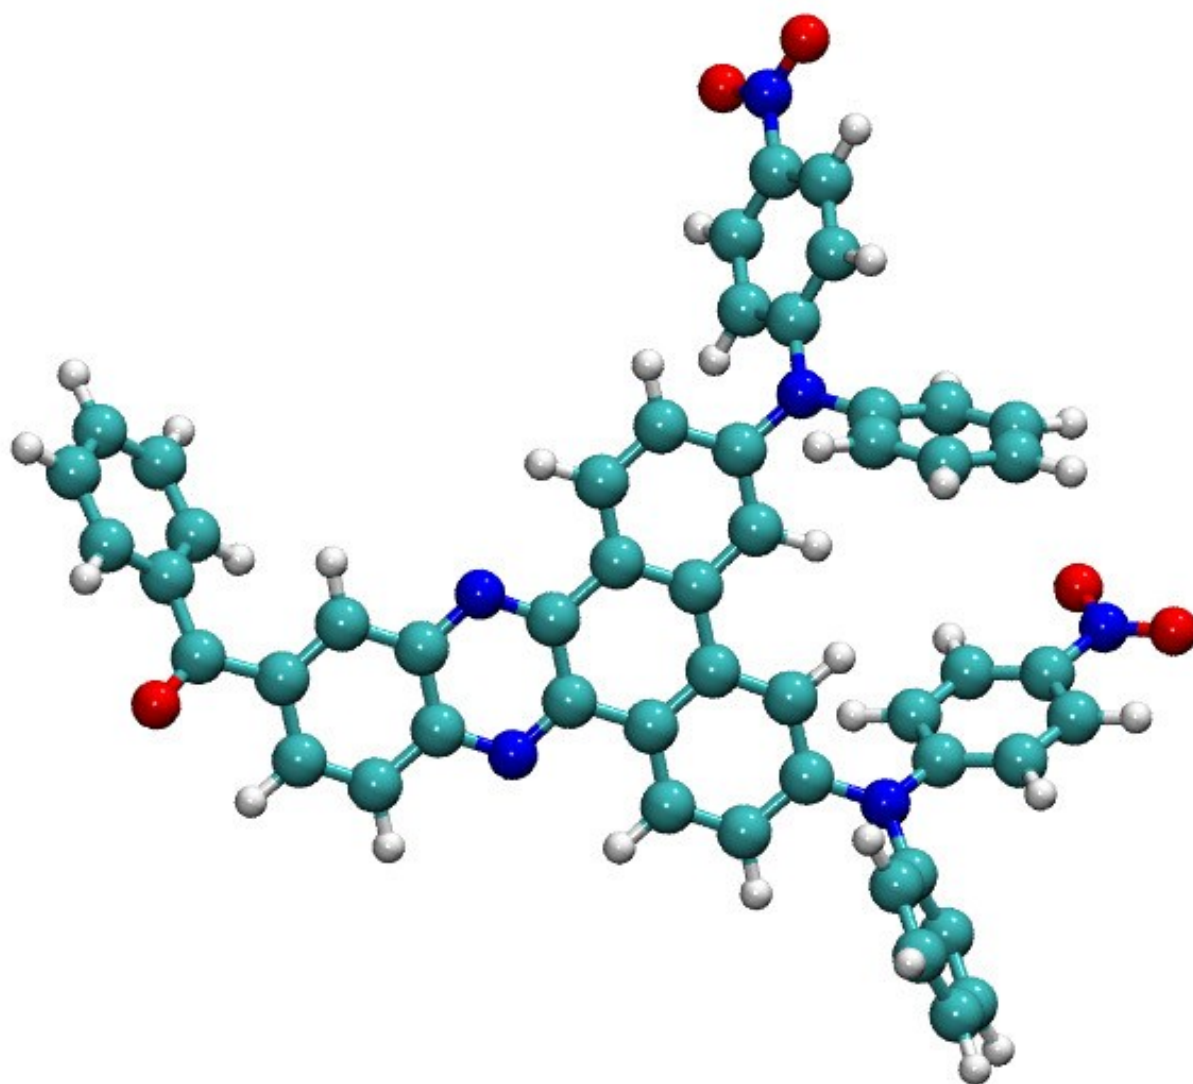

**Figure S34:** Optimized structures of compound 5.

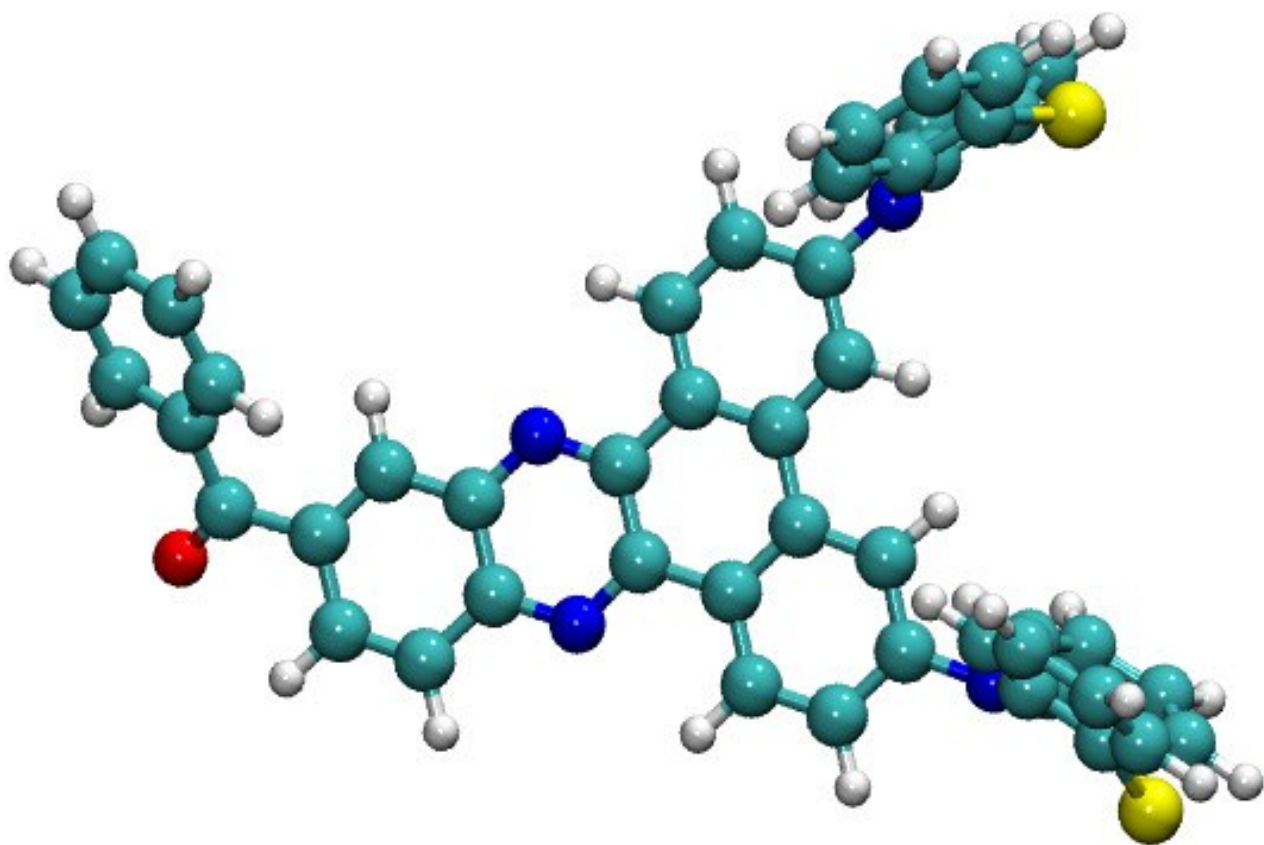

**Figure S35:** Optimized structures of compound **6**.

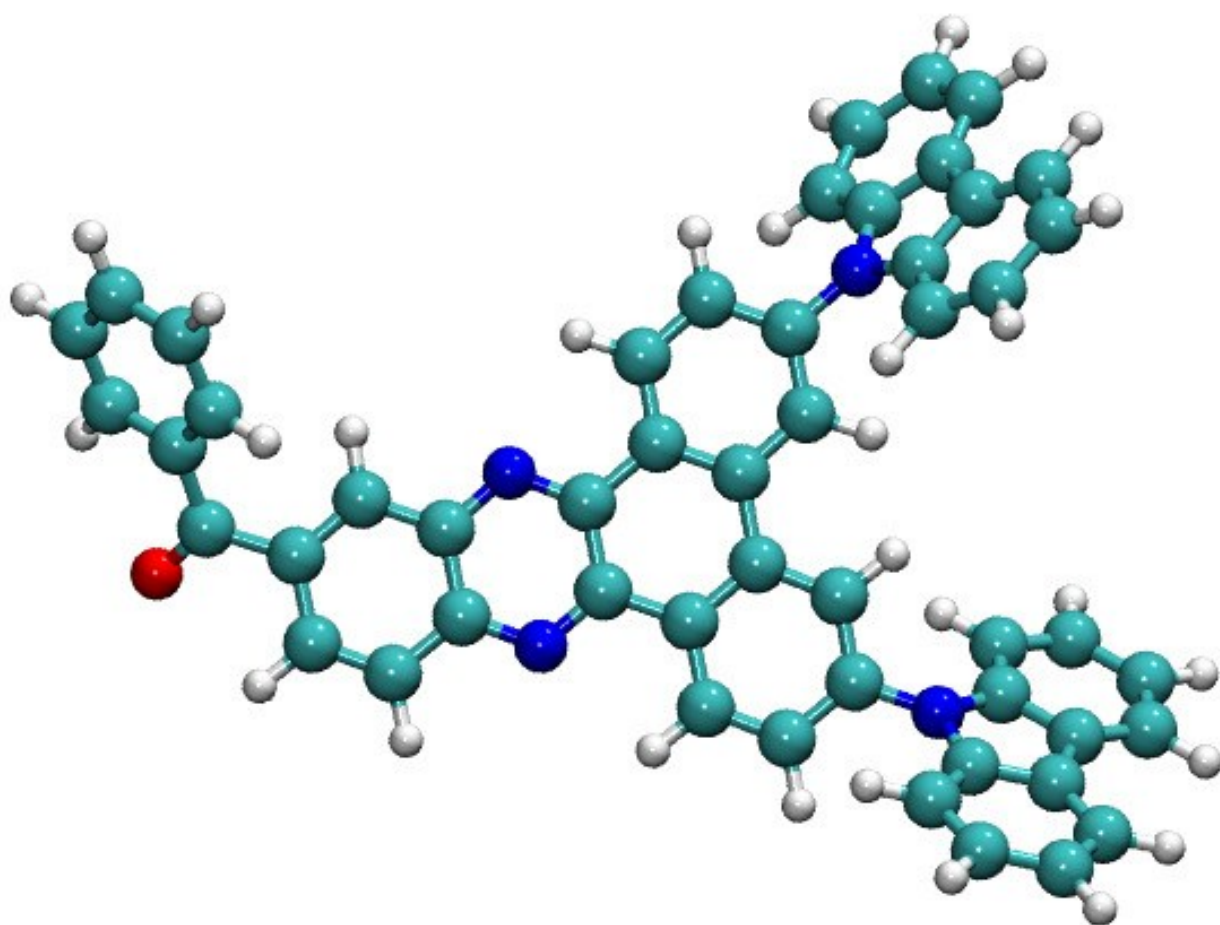

**Figure S36:** Optimized structures of compound 7.

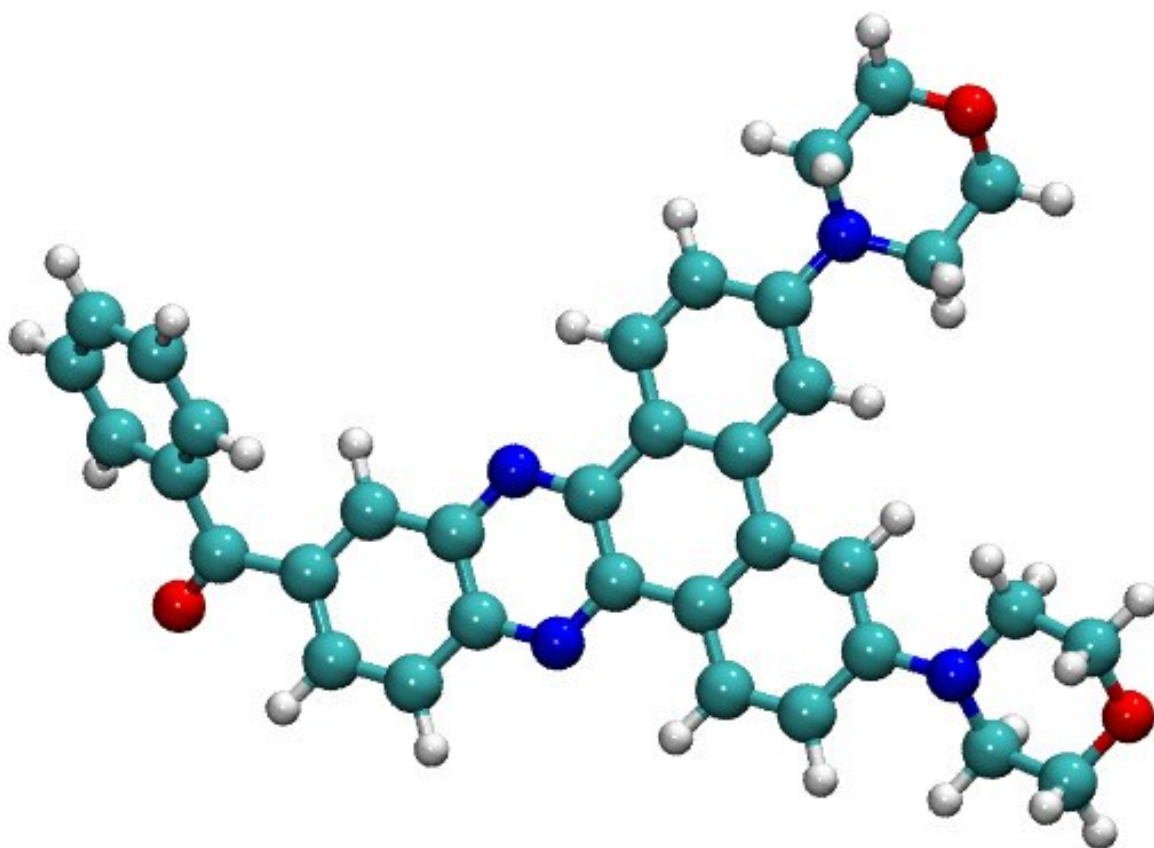

**Figure S37:** Optimized structures of compound 8.

11. Frontier molecular orbitals of compounds 1–8.

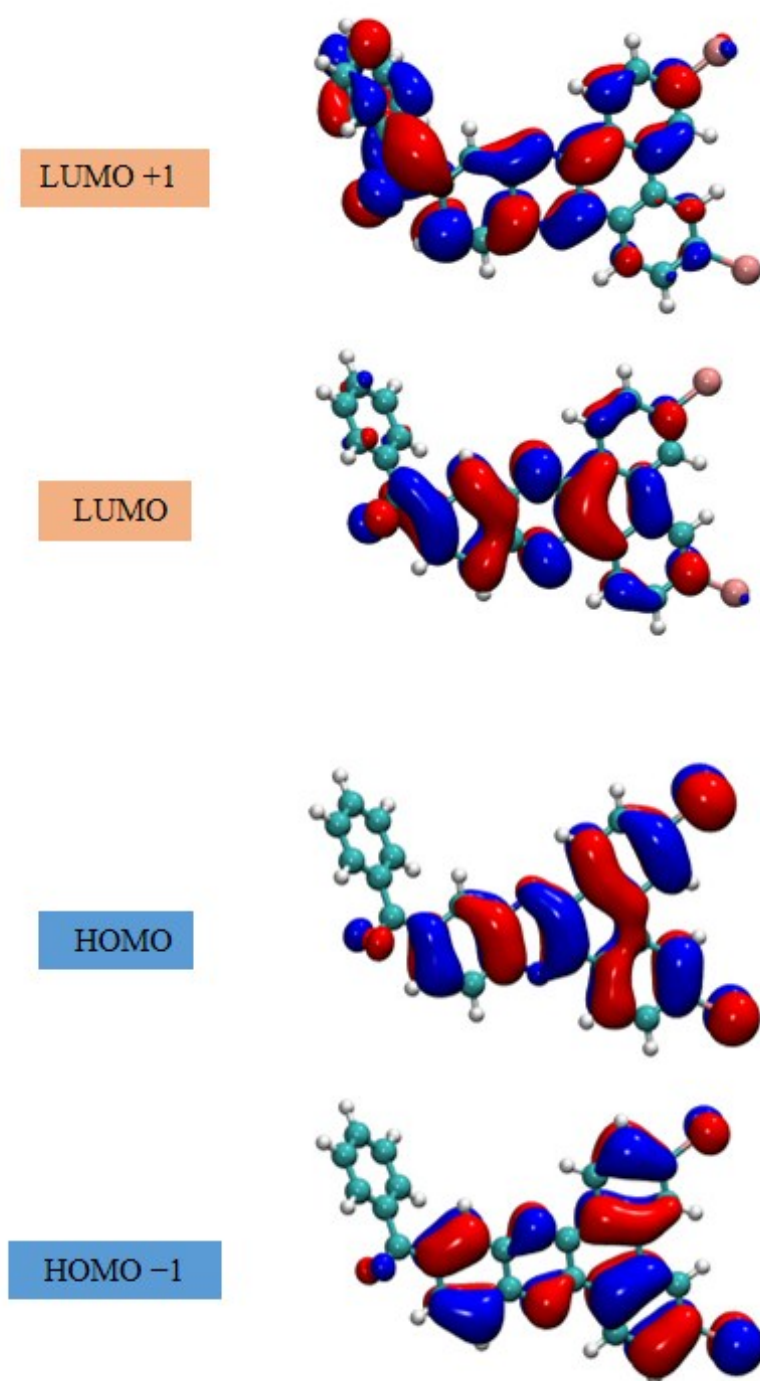

Figure S38: Frontier molecular orbital of compound 1.



LUMO +1

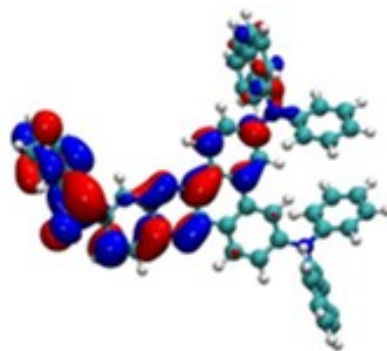

LUMO

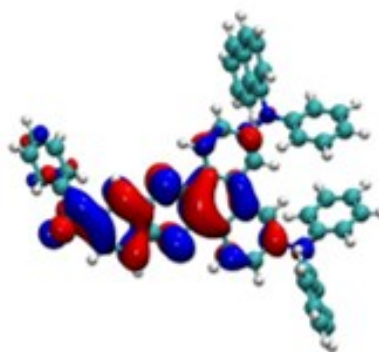

HOMO

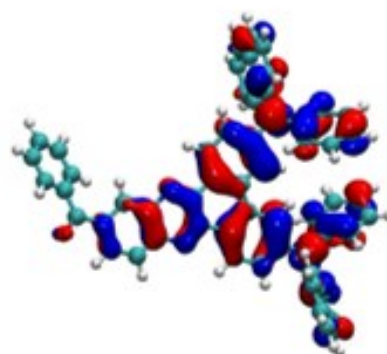

HOMO -1

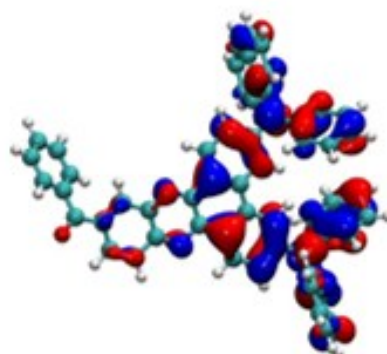

Figure S39: Frontier molecular orbital of compound 3.

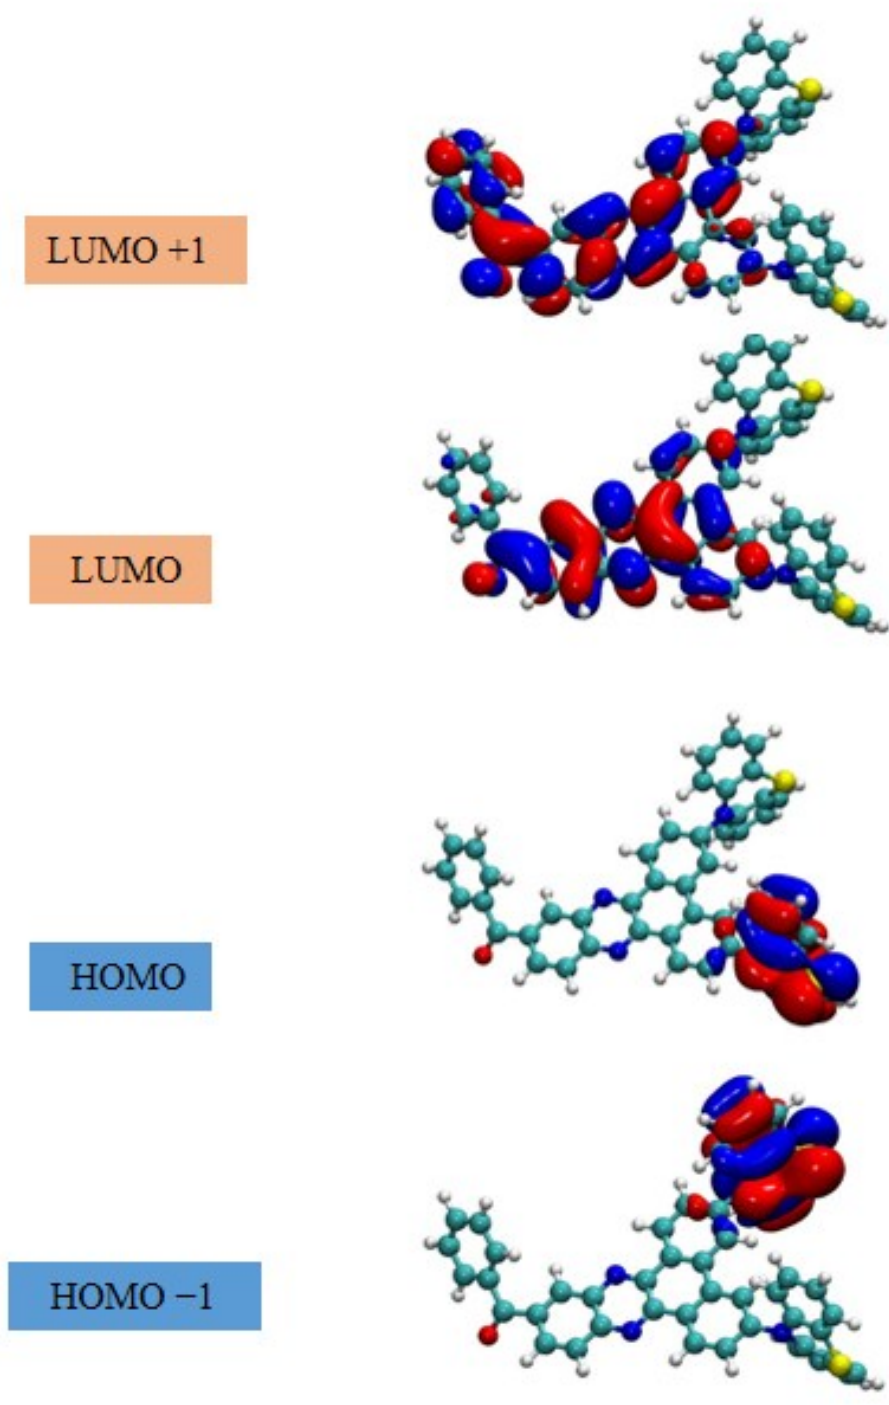

Figure S40: Frontier molecular orbital of compound 6.

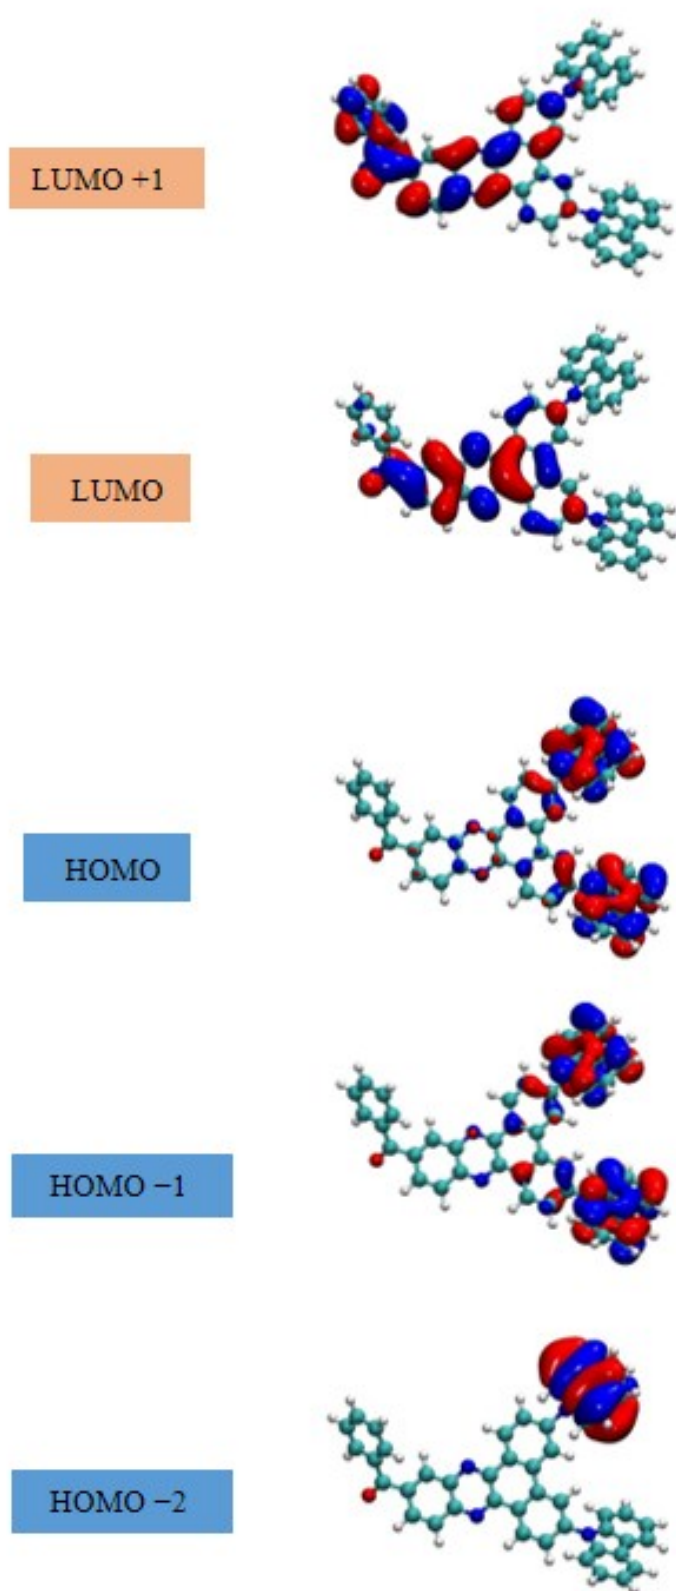

Figure S41: Frontier molecular orbital of compound 7.

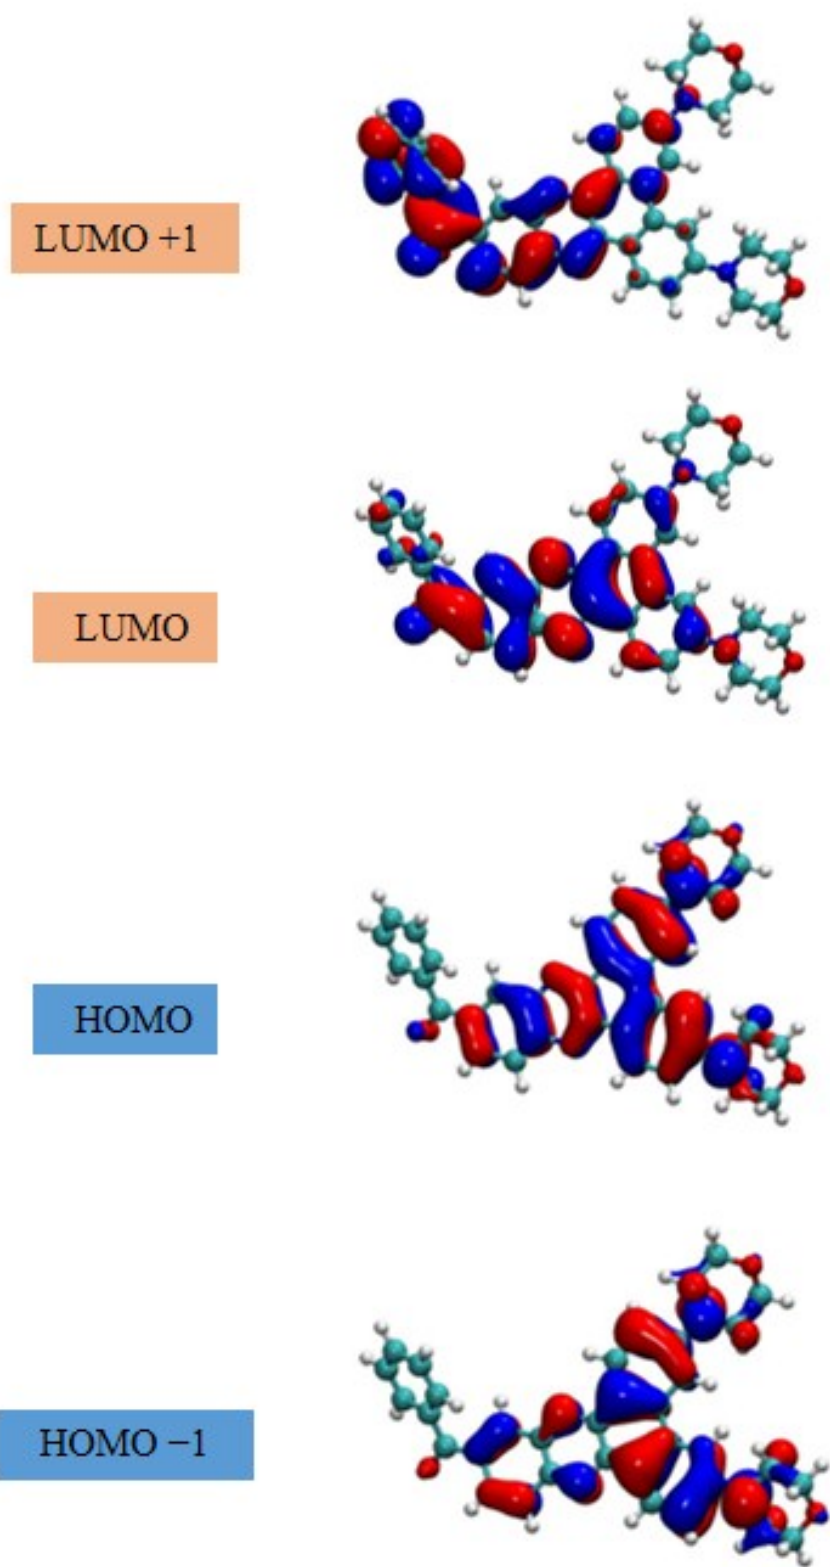

Figure S42: Frontier molecular orbital of compound 8.

12. Cartesian coordinates and charges (Mulliken and Lowdin) of compounds 1–8.

A. **Table S1:** Cartesian coordinates of optimized structure of compound 1.

Total Energy: – 6370.67 Hartrees

| Atom | X        | Y        | Z        | Mulliken | Lowdin   |
|------|----------|----------|----------|----------|----------|
|      |          |          |          | Charges  | Charges  |
| C    | 6.909965 | 9.741661 | 6.843187 | -0.29744 | -0.02758 |
| C    | 8.009613 | 10.19348 | 6.116429 | -0.25972 | -0.04206 |
| C    | 9.295776 | 9.796801 | 6.476712 | -0.89809 | -0.02603 |
| C    | 9.489642 | 8.927235 | 7.558166 | 1.252826 | -0.09421 |
| C    | 8.374969 | 8.459055 | 8.268386 | 0.406206 | 0.001555 |
| C    | 10.8394  | 8.403564 | 7.942559 | -0.95445 | 0.024908 |
| C    | 12.06862 | 9.241798 | 7.732019 | 0.727969 | -0.07567 |
| C    | 13.30783 | 8.55935  | 7.537871 | 0.23655  | 0.010206 |
| C    | 14.48161 | 9.249197 | 7.405577 | -0.34281 | -0.00883 |
| C    | 14.48858 | 10.66858 | 7.49086  | 0.070138 | -0.03945 |
| C    | 13.25507 | 11.35881 | 7.711502 | 0.186201 | -0.04603 |
| C    | 12.04966 | 10.61681 | 7.820163 | -0.93283 | 0.006104 |
| N    | 15.64584 | 11.34956 | 7.371147 | 0.165383 | -0.04076 |
| C    | 15.60493 | 12.6703  | 7.469982 | -0.20357 | -0.02107 |
| C    | 14.36627 | 13.36325 | 7.698279 | -0.23479 | -0.02551 |
| N    | 13.22375 | 12.70393 | 7.813392 | 0.185698 | -0.03669 |
| O    | 10.95261 | 7.293764 | 8.436978 | -0.18438 | -0.15856 |
| C    | 16.84762 | 13.4302  | 7.344658 | 0.413713 | -0.04931 |
| C    | 16.83437 | 14.84103 | 7.449469 | 0.593089 | -0.02888 |
| C    | 15.56598 | 15.55062 | 7.685208 | 0.566473 | -0.02997 |
| C    | 14.35969 | 14.82195 | 7.806335 | 0.493173 | -0.04866 |
| C    | 15.5117  | 16.95365 | 7.796667 | -0.64862 | -0.06616 |
| C    | 14.30681 | 17.5934  | 8.018438 | -0.10031 | -0.2269  |
| C    | 13.11097 | 16.87986 | 8.139368 | -0.40092 | -0.06833 |
| C    | 13.15106 | 15.50288 | 8.032094 | -0.27221 | 0.008059 |
| C    | 18.0609  | 12.7566  | 7.12016  | -0.27975 | 0.00954  |
| C    | 19.2528  | 13.44439 | 6.997897 | -0.35969 | -0.06814 |
| C    | 19.23227 | 14.83813 | 7.102914 | -0.13962 | -0.22602 |
| C    | 18.05613 | 15.5301  | 7.32311  | -0.74364 | -0.06644 |
| Br   | 14.27268 | 19.5027  | 8.164448 | -0.14907 | 0.277264 |
| Br   | 20.87405 | 15.80999 | 6.938147 | -0.14805 | 0.278185 |
| H    | 6.24023  | 8.519243 | 8.485676 | 0.178279 | 0.056844 |
| H    | 5.9105   | 10.05912 | 6.567623 | 0.163875 | 0.056017 |
| H    | 7.867285 | 10.85319 | 5.268127 | 0.1834   | 0.056779 |
| H    | 10.14387 | 10.14325 | 5.899121 | 0.18209  | 0.068216 |
| H    | 8.533097 | 7.768962 | 9.088189 | 0.21778  | 0.073486 |
| H    | 13.29079 | 7.477237 | 7.502629 | 0.229287 | 0.076466 |
| H    | 15.42575 | 8.743006 | 7.243427 | 0.187361 | 0.070924 |

|   |          |          |          |          |          |
|---|----------|----------|----------|----------|----------|
| H | 11.13449 | 11.16676 | 7.998881 | 0.220091 | 0.08265  |
| H | 16.40713 | 17.55097 | 7.71114  | 0.076315 | 0.061288 |
| H | 12.17656 | 17.39694 | 8.31355  | 0.244858 | 0.062704 |
| H | 12.24388 | 14.92005 | 8.121713 | 0.178672 | 0.077377 |
| H | 18.0409  | 11.67746 | 7.045119 | 0.194163 | 0.077874 |
| H | 20.18263 | 12.91881 | 6.825195 | 0.244159 | 0.062877 |
| H | 18.09457 | 16.60668 | 7.395744 | 0.070204 | 0.061281 |

**B. Table S2:** Cartesian coordinates of optimized structure of compound 2.  
Total Energy: -2258.74 Hartrees

| Atom | X        | y        | Z        | Mulliken | Lowdin   |
|------|----------|----------|----------|----------|----------|
|      |          |          |          | Charges  | Charges  |
| C    | -11.8869 | 4.510302 | 8.058431 | -0.31929 | -0.03094 |
| C    | -11.9193 | 3.470675 | 8.989779 | -0.27238 | -0.04153 |
| C    | -11.4556 | 2.208326 | 8.639467 | 0.343712 | -0.00038 |
| C    | -10.9265 | 1.975303 | 7.362309 | 1.286811 | -0.09217 |
| C    | -10.8983 | 3.02318  | 6.433036 | -0.90119 | -0.02646 |
| C    | -10.4905 | 0.580343 | 7.024149 | -0.78267 | 0.024548 |
| C    | -9.37887 | 0.350079 | 6.044488 | 0.585589 | -0.08266 |
| C    | -9.36252 | -0.89071 | 5.339677 | 0.166743 | 0.003747 |
| C    | -8.34769 | -1.19734 | 4.473841 | -0.26125 | -0.01256 |
| C    | -7.27004 | -0.28982 | 4.282702 | 0.025558 | -0.043   |
| C    | -7.26419 | 0.942719 | 5.006397 | 0.131592 | -0.05081 |
| C    | -8.34115 | 1.244309 | 5.878508 | -0.93399 | 0.004055 |
| N    | -6.26765 | -0.59522 | 3.432651 | 0.161072 | -0.04908 |
| C    | -5.27843 | 0.277034 | 3.295994 | -0.19563 | -0.02011 |
| C    | -5.26542 | 1.51398  | 4.037621 | -0.33051 | -0.02507 |
| N    | -6.24913 | 1.823805 | 4.86809  | 0.184166 | -0.04445 |
| O    | -11.038  | -0.37515 | 7.551759 | -0.18971 | -0.16437 |
| C    | -4.18682 | -0.02176 | 2.37772  | 0.160322 | -0.06151 |
| C    | -3.11319 | 0.886606 | 2.212738 | -0.10006 | -0.02263 |
| C    | -3.08621 | 2.138844 | 2.991281 | -0.13871 | -0.02426 |
| C    | -4.14965 | 2.439834 | 3.875322 | 0.193535 | -0.06031 |
| C    | -2.03332 | 3.060324 | 2.873895 | -0.3012  | -0.02413 |
| C    | -1.9994  | 4.241829 | 3.613726 | -0.3183  | -0.03481 |
| C    | -3.06729 | 4.52809  | 4.488212 | -0.13664 | -0.02631 |
| C    | -4.11621 | 3.642207 | 4.605303 | -0.29175 | 0.01036  |
| C    | -4.19191 | -1.21981 | 1.639103 | -0.26997 | 0.012124 |
| C    | -3.18278 | -1.52475 | 0.752509 | -0.10753 | -0.02693 |
| C    | -2.10778 | -0.62965 | 0.574982 | -0.24694 | -0.03297 |
| C    | -2.08776 | 0.553297 | 1.314058 | -0.31474 | -0.02499 |
| N    | -0.90753 | 5.132775 | 3.499346 | 0.741517 | -0.0945  |

|   |          |          |          |          |          |
|---|----------|----------|----------|----------|----------|
| N | -1.07617 | -0.92321 | -0.34425 | 0.736184 | -0.09391 |
| C | -1.12182 | 6.539255 | 3.54213  | -0.15753 | -0.05757 |
| C | 0.415948 | 4.631694 | 3.333581 | -0.30509 | -0.0578  |
| C | -0.62736 | -2.26359 | -0.51728 | -0.08301 | -0.05801 |
| C | -0.47179 | 0.117133 | -1.10806 | -0.29253 | -0.05819 |
| C | -0.26595 | 7.364685 | 4.283669 | 0.17399  | -0.03573 |
| C | -0.47208 | 8.740629 | 4.316052 | -0.37325 | -0.03718 |
| C | -1.53958 | 9.314118 | 3.625726 | -0.3809  | -0.057   |
| C | -2.39629 | 8.494312 | 2.892276 | -0.36075 | -0.03785 |
| C | -2.18726 | 7.119141 | 2.840535 | 0.258464 | -0.0389  |
| C | 1.276874 | 5.201305 | 2.387044 | 0.160195 | -0.03538 |
| C | 2.574914 | 4.720055 | 2.239955 | -0.32592 | -0.03697 |
| C | 3.028855 | 3.657228 | 3.019693 | -0.37841 | -0.05611 |
| C | 2.171262 | 3.084142 | 3.958486 | -0.24865 | -0.03758 |
| C | 0.877738 | 3.57     | 4.123166 | 0.074531 | -0.03523 |
| C | 0.920498 | 0.1765   | -1.24683 | 0.05148  | -0.03439 |
| C | 1.507041 | 1.181664 | -2.01094 | -0.29697 | -0.03667 |
| C | 0.719093 | 2.148632 | -2.63346 | -0.41828 | -0.05549 |
| C | -0.66734 | 2.095862 | -2.49046 | -0.1795  | -0.03764 |
| C | -1.26235 | 1.084984 | -1.7417  | 0.063346 | -0.03514 |
| C | -0.39594 | -2.77214 | -1.80209 | 0.171995 | -0.03507 |
| C | 0.05109  | -4.07952 | -1.96897 | -0.37903 | -0.03699 |
| C | 0.259947 | -4.90334 | -0.86329 | -0.38138 | -0.05598 |
| C | 0.025455 | -4.40095 | 0.416106 | -0.35971 | -0.03739 |
| C | -0.40612 | -3.08943 | 0.592652 | 0.196544 | -0.03823 |
| H | -11.3738 | 5.083101 | 6.04813  | 0.180542 | 0.055932 |
| H | -12.2564 | 5.493224 | 8.328871 | 0.161234 | 0.054926 |
| H | -12.3122 | 3.645336 | 9.985021 | 0.176412 | 0.055826 |
| H | -11.4958 | 1.385757 | 9.343154 | 0.215138 | 0.072823 |
| H | -10.5197 | 2.850833 | 5.433148 | 0.185762 | 0.068471 |
| H | -10.1763 | -1.58372 | 5.512764 | 0.224359 | 0.074652 |
| H | -8.33242 | -2.12967 | 3.921702 | 0.176939 | 0.069101 |
| H | -8.29949 | 2.180429 | 6.420738 | 0.20433  | 0.081212 |
| H | -1.21242 | 2.865666 | 2.199295 | -0.0682  | 0.074109 |
| H | -3.05459 | 5.439015 | 5.073225 | 0.180785 | 0.076187 |
| H | -4.93327 | 3.849417 | 5.283929 | 0.2321   | 0.075975 |
| H | -5.02602 | -1.89616 | 1.772228 | 0.246338 | 0.076449 |
| H | -3.21669 | -2.44497 | 0.18327  | 0.179987 | 0.07626  |
| H | -1.24922 | 1.219718 | 1.174648 | -0.07789 | 0.073943 |
| H | 0.558579 | 6.923656 | 4.830713 | 0.166663 | 0.074665 |
| H | 0.198515 | 9.365251 | 4.895742 | 0.186012 | 0.055416 |
| H | -1.70087 | 10.38526 | 3.658343 | 0.158871 | 0.053022 |
| H | -3.22568 | 8.927069 | 2.343872 | 0.190962 | 0.055431 |
| H | -2.84875 | 6.489251 | 2.258078 | 0.151752 | 0.074427 |

|   |          |          |          |          |          |
|---|----------|----------|----------|----------|----------|
| H | 0.925917 | 6.022137 | 1.773384 | 0.170621 | 0.074713 |
| H | 3.229141 | 5.171377 | 1.502318 | 0.188707 | 0.055363 |
| H | 4.038015 | 3.281117 | 2.898654 | 0.162287 | 0.05314  |
| H | 2.514126 | 2.262835 | 4.577973 | 0.191927 | 0.055777 |
| H | 0.219872 | 3.12928  | 4.862484 | 0.177106 | 0.07547  |
| H | 1.536908 | -0.56787 | -0.75737 | 0.16991  | 0.074877 |
| H | 2.586478 | 1.214724 | -2.10838 | 0.190513 | 0.055471 |
| H | 1.178793 | 2.932995 | -3.22336 | 0.159149 | 0.05324  |
| H | -1.29258 | 2.836607 | -2.97652 | 0.192753 | 0.055742 |
| H | -2.34043 | 1.040419 | -1.64465 | 0.173058 | 0.07545  |
| H | -0.56649 | -2.1391  | -2.66451 | 0.167233 | 0.074707 |
| H | 0.22388  | -4.45907 | -2.96993 | 0.186369 | 0.055481 |
| H | 0.601865 | -5.92299 | -0.99685 | 0.159132 | 0.053236 |
| H | 0.19179  | -5.02786 | 1.285102 | 0.192035 | 0.055759 |
| H | -0.57529 | -2.70053 | 1.589547 | 0.15284  | 0.074695 |

**C. Table S3:** Cartesian coordinates of optimized structure of compound **3**.  
Total Energy: -2566.08 Hartrees

| Atom | X        | y        | Z        | Mulliken | Lowdin   |
|------|----------|----------|----------|----------|----------|
|      |          |          |          | Charges  | Charges  |
| C    | 11.33942 | 8.799746 | 10.12792 | -0.3112  | -0.0314  |
| C    | 10.40604 | 8.96996  | 9.107528 | -0.25081 | -0.04362 |
| C    | 9.283237 | 8.147245 | 9.043148 | -0.88996 | -0.02628 |
| C    | 9.075575 | 7.157509 | 10.01247 | 1.271575 | -0.09201 |
| C    | 10.00805 | 7.010034 | 11.0489  | 0.344795 | -0.00067 |
| C    | 7.846874 | 6.297285 | 10.04076 | -0.76371 | 0.024454 |
| C    | 7.172993 | 5.895863 | 8.763166 | 0.516933 | -0.08364 |
| C    | 5.780095 | 5.59104  | 8.816553 | 0.146243 | 0.002832 |
| C    | 5.109123 | 5.158767 | 7.704468 | -0.25756 | -0.01298 |
| C    | 5.800493 | 4.977254 | 6.475694 | 0.058371 | -0.04335 |
| C    | 7.201014 | 5.255952 | 6.419756 | 0.112867 | -0.05131 |
| C    | 7.865342 | 5.724902 | 7.581534 | -0.92552 | 0.00381  |
| N    | 5.139696 | 4.540529 | 5.382967 | 0.164124 | -0.04981 |
| C    | 5.828879 | 4.37287  | 4.263082 | -0.16356 | -0.01958 |
| C    | 7.244468 | 4.646572 | 4.208907 | -0.36831 | -0.02464 |
| N    | 7.898274 | 5.080395 | 5.275228 | 0.187508 | -0.04516 |
| O    | 7.393307 | 5.916774 | 11.10888 | -0.1901  | -0.16521 |
| C    | 5.142266 | 3.900225 | 3.067596 | 0.134087 | -0.0645  |
| C    | 5.850105 | 3.701951 | 1.856635 | -0.06801 | -0.02281 |
| C    | 7.300335 | 3.971319 | 1.803927 | -0.13189 | -0.02459 |
| C    | 7.970201 | 4.44051  | 2.960081 | 0.147118 | -0.06311 |
| C    | 8.042595 | 3.7883   | 0.628074 | -0.29575 | -0.03485 |



|   |          |          |          |          |          |
|---|----------|----------|----------|----------|----------|
| C | 9.416298 | 4.035025 | 0.572339 | -0.03639 | -0.03456 |
| C | 10.06615 | 4.508562 | 1.729451 | -0.27812 | -0.02646 |
| C | 9.348621 | 4.706119 | 2.890248 | -0.24255 | 0.015101 |
| C | 3.763286 | 3.627814 | 3.105072 | -0.22737 | 0.016887 |
| C | 3.083122 | 3.182327 | 1.992261 | -0.28459 | -0.02718 |
| C | 3.772077 | 2.980637 | 0.779023 | -0.02021 | -0.03267 |
| C | 5.145556 | 3.23503  | 0.737625 | -0.29468 | -0.03606 |
| N | 10.13541 | 3.838598 | -0.6254  | 0.736991 | -0.10322 |
| N | 3.091142 | 2.50232  | -0.3582  | 0.724478 | -0.10234 |
| C | 11.3412  | 4.576354 | -0.86008 | -0.33874 | -0.05036 |
| C | 9.815955 | 2.778427 | -1.52196 | -0.01201 | -0.05213 |
| C | 3.468322 | 2.893022 | -1.67589 | -0.02092 | -0.05284 |
| C | 1.881375 | 1.749664 | -0.20142 | -0.3067  | -0.05034 |
| C | 11.29234 | 5.994084 | -1.0539  | 0.123123 | -0.05629 |
| C | 12.52306 | 6.695956 | -1.26951 | 0.368586 | -0.06175 |
| C | 13.74256 | 5.972152 | -1.3148  | -0.12566 | -0.02782 |
| C | 13.75143 | 4.607959 | -1.15494 | -0.3969  | -0.03563 |
| C | 12.54781 | 3.910688 | -0.91965 | 0.092306 | -0.02153 |
| C | 9.917614 | 2.983651 | -2.90442 | 0.026458 | -0.03222 |
| C | 9.637526 | 1.948698 | -3.79141 | -0.43868 | -0.03543 |
| C | 9.240046 | 0.698516 | -3.3192  | -0.44629 | -0.05728 |
| C | 9.136055 | 0.491916 | -1.94423 | -0.10769 | -0.03759 |
| C | 9.428178 | 1.517179 | -1.04912 | 0.134588 | -0.04148 |
| C | 1.91175  | 0.453685 | 0.406372 | 0.120596 | -0.05668 |
| C | 0.676351 | -0.25673 | 0.558368 | 0.349058 | -0.06174 |
| C | -0.52722 | 0.322068 | 0.079398 | -0.1287  | -0.02721 |
| C | -0.51699 | 1.55409  | -0.52765 | -0.41553 | -0.03569 |
| C | 0.690376 | 2.271678 | -0.66117 | 0.091863 | -0.02104 |
| C | 3.435199 | 1.954046 | -2.71495 | 0.037081 | -0.03091 |
| C | 3.774561 | 2.328468 | -4.01159 | -0.45719 | -0.035   |
| C | 4.162984 | 3.637781 | -4.29184 | -0.44476 | -0.05604 |
| C | 4.197244 | 4.57439  | -3.25946 | -0.11825 | -0.03783 |
| C | 3.845839 | 4.211925 | -1.96225 | 0.138677 | -0.04075 |
| C | 10.07908 | 6.731736 | -1.06379 | -0.31819 | -0.01422 |
| C | 10.08262 | 8.092995 | -1.25651 | -0.26689 | -0.03501 |
| C | 11.29817 | 8.789083 | -1.44734 | -0.28966 | -0.04155 |
| C | 12.48806 | 8.10345  | -1.45672 | -0.15843 | -0.02871 |
| C | 3.110894 | -0.16791 | 0.84465  | -0.32264 | -0.0147  |
| C | 3.088747 | -1.41556 | 1.42164  | -0.26661 | -0.03415 |
| C | 1.867654 | -2.10694 | 1.592983 | -0.2925  | -0.04086 |
| C | 0.691723 | -1.54001 | 1.166817 | -0.14664 | -0.02833 |
| H | 11.8623  | 7.684263 | 11.89517 | 0.175969 | 0.055641 |
| H | 12.21786 | 9.434023 | 10.17117 | 0.161057 | 0.054758 |
| H | 10.55036 | 9.743223 | 8.361521 | 0.179762 | 0.0559   |

|   |          |          |          |          |          |
|---|----------|----------|----------|----------|----------|
| H | 8.557231 | 8.293355 | 8.252934 | 0.187547 | 0.0686   |
| H | 9.826784 | 6.258733 | 11.80794 | 0.214744 | 0.07271  |
| H | 5.270044 | 5.708793 | 9.764455 | 0.224811 | 0.074364 |
| H | 4.048545 | 4.937556 | 7.729332 | 0.172566 | 0.068881 |
| H | 8.929105 | 5.91273  | 7.508826 | 0.199748 | 0.081018 |
| H | 7.554155 | 3.449149 | -0.27355 | -0.19018 | 0.073113 |
| H | 11.12942 | 4.710048 | 1.707258 | 0.204388 | 0.077511 |
| H | 9.84539  | 5.060514 | 3.783923 | 0.263906 | 0.07604  |
| H | 3.23745  | 3.78854  | 4.037072 | 0.271088 | 0.076587 |
| H | 2.01945  | 2.989862 | 2.046412 | 0.205249 | 0.077755 |
| H | 5.664762 | 3.054032 | -0.19188 | -0.14979 | 0.072863 |
| H | 14.66711 | 6.51359  | -1.48438 | 0.15253  | 0.060028 |
| H | 14.6848  | 4.057978 | -1.19399 | 0.18358  | 0.056793 |
| H | 12.56397 | 2.836013 | -0.78083 | 0.152113 | 0.076953 |
| H | 10.21981 | 3.954852 | -3.27758 | 0.167939 | 0.07495  |
| H | 9.719906 | 2.125927 | -4.85802 | 0.190915 | 0.05531  |
| H | 9.016149 | -0.10377 | -4.01244 | 0.163808 | 0.052891 |
| H | 8.839506 | -0.47848 | -1.56153 | 0.194032 | 0.055406 |
| H | 9.35871  | 1.342467 | 0.017513 | 0.18874  | 0.074844 |
| H | -1.45497 | -0.22805 | 0.194735 | 0.152958 | 0.060163 |
| H | -1.43811 | 1.991062 | -0.89602 | 0.18288  | 0.056798 |
| H | 0.689471 | 3.249556 | -1.12836 | 0.152628 | 0.076709 |
| H | 3.140325 | 0.933769 | -2.50085 | 0.16919  | 0.075205 |
| H | 3.745484 | 1.588553 | -4.8037  | 0.191042 | 0.055475 |
| H | 4.433742 | 3.925167 | -5.30105 | 0.164785 | 0.053069 |
| H | 4.485938 | 5.599287 | -3.46513 | 0.193648 | 0.055424 |
| H | 3.861347 | 4.948944 | -1.16868 | 0.189478 | 0.074848 |
| H | 9.143019 | 6.209268 | -0.91776 | 0.07862  | 0.075903 |
| H | 9.145759 | 8.638651 | -1.26284 | 0.180485 | 0.055824 |
| H | 11.28638 | 9.863467 | -1.59212 | 0.166034 | 0.054751 |
| H | 13.42413 | 8.62938  | -1.61306 | 0.14409  | 0.05977  |
| H | 4.0516   | 0.351773 | 0.719887 | 0.083579 | 0.076064 |
| H | 4.014992 | -1.87442 | 1.748586 | 0.180703 | 0.056101 |
| H | 1.864436 | -3.08757 | 2.055247 | 0.166772 | 0.054988 |
| H | -0.2479  | -2.06957 | 1.284816 | 0.14496  | 0.059906 |

**D. Table S4:** Cartesian coordinates of optimized structure of compound 4.  
Total Energy: -2716.96 Hartrees

| Atom | X        | y        | Z        | Mulliken | Lowdin   |
|------|----------|----------|----------|----------|----------|
|      |          |          |          | Charges  | Charges  |
| C    | -8.7372  | 10.37594 | -8.01076 | -0.30151 | -0.03226 |
| C    | -7.87606 | 10.93591 | -8.9563  | -0.28422 | -0.04245 |
| C    | -6.55539 | 11.20799 | -8.61965 | 0.338308 | -0.00116 |
| C    | -6.06962 | 10.89764 | -7.34183 | 1.296671 | -0.09137 |
| C    | -6.93997 | 10.33683 | -6.39838 | -0.84921 | -0.02661 |
| C    | -4.65025 | 11.26376 | -7.01964 | -0.81026 | 0.02433  |
| C    | -3.85887 | 10.44689 | -6.04426 | 0.603774 | -0.0851  |
| C    | -2.77806 | 11.08718 | -5.36783 | 0.155637 | 0.001467 |
| C    | -1.97134 | 10.39018 | -4.50917 | -0.27928 | -0.01399 |
| C    | -2.18089 | 9.000254 | -4.29663 | 0.064596 | -0.04405 |
| C    | -3.2473  | 8.345968 | -4.98719 | 0.107488 | -0.05232 |
| C    | -4.0805  | 9.097433 | -5.85397 | -0.93828 | 0.003343 |
| N    | -1.37614 | 8.312865 | -3.45913 | 0.157493 | -0.05231 |
| C    | -1.60299 | 7.016041 | -3.30033 | -0.16563 | -0.01976 |
| C    | -2.67812 | 6.354073 | -4.0013  | -0.36038 | -0.02476 |
| N    | -3.47278 | 7.02314  | -4.82241 | 0.181522 | -0.04761 |
| O    | -4.13439 | 12.23036 | -7.55967 | -0.19204 | -0.16687 |
| C    | -0.75036 | 6.247552 | -2.40455 | 0.120413 | -0.0669  |
| C    | -0.96503 | 4.860879 | -2.21258 | -0.13502 | -0.02113 |
| C    | -2.05782 | 4.18224  | -2.93572 | -0.17907 | -0.02297 |
| C    | -2.89301 | 4.925748 | -3.80378 | 0.142058 | -0.06593 |
| C    | -2.30526 | 2.810221 | -2.77851 | -0.29652 | -0.03054 |
| C    | -3.3361  | 2.158363 | -3.45964 | -0.15278 | -0.03057 |
| C    | -4.15893 | 2.914665 | -4.32192 | -0.10653 | -0.03259 |
| C    | -3.93537 | 4.264811 | -4.47989 | -0.24126 | 0.010398 |
| C    | 0.303852 | 6.877084 | -1.71548 | -0.23676 | 0.012004 |
| C    | 1.12749  | 6.18003  | -0.86008 | -0.08598 | -0.03291 |
| C    | 0.929149 | 4.796334 | -0.65916 | -0.109   | -0.02908 |
| C    | -0.1121  | 4.164275 | -1.3439  | -0.31768 | -0.0312  |
| N    | -3.54456 | 0.775697 | -3.29887 | 0.824606 | -0.09685 |
| N    | 1.758108 | 4.074366 | 0.217692 | 0.820743 | -0.09626 |
| C    | -4.85453 | 0.219906 | -3.38921 | -0.31526 | -0.0751  |
| C    | -2.44735 | -0.0986  | -3.0335  | -0.68204 | -0.07709 |
| C    | 3.127883 | 4.432459 | 0.389822 | -0.38142 | -0.07515 |
| C    | 1.256336 | 2.938929 | 0.924443 | -0.65861 | -0.07778 |
| C    | -1.30104 | -0.06965 | -3.82808 | 0.1256   | -0.01916 |
| C    | -0.22418 | -0.91858 | -3.57094 | 0.362557 | -0.06947 |

|   |          |          |          |          |          |         |
|---|----------|----------|----------|----------|----------|---------|
| C | -0.29499 | -1.83211 | -2.51622 | -0.9474  | -0.02829 |         |
| C | -1.44845 | -1.87726 | -1.72375 | -0.06117 | -0.02467 |         |
| C | -2.50521 | -1.01637 | -1.97471 | 0.074873 | -0.0175  |         |
| C | -5.93286 | 0.804926 | -2.70724 | 0.160229 | -0.02323 |         |
| C | -7.20374 | 0.259337 | -2.78921 | -0.19529 | -0.02672 |         |
| C | -7.43025 | -0.90203 | -3.53835 | -0.72828 | -0.02893 |         |
| C | -6.36218 | -1.50185 | -4.20894 | 0.16223  | -0.06837 |         |
| C | -5.08951 | -0.93325 | -4.13861 | 0.100331 | -0.01834 |         |
| C | 3.947315 | 4.698212 | -0.71832 | 0.158629 | -0.0231  |         |
| C | 5.280503 | 5.035641 | -0.5498  | -0.20669 | -0.02618 |         |
| C | 5.839908 | 5.095876 | 0.732693 | -0.72907 | -0.02856 |         |
| C | 5.037804 | 4.819581 | 1.842083 | 0.155285 | -0.06831 |         |
| C | 3.690764 | 4.500753 | 1.664539 | 0.147962 | -0.01787 |         |
| C | 0.091944 | 3.029699 | 1.687125 | 0.113174 | -0.01835 |         |
| C | -0.4037  | 1.924221 | 2.379232 | 0.366487 | -0.06964 |         |
| C | 0.283074 | 0.708325 | 2.3303   | -0.95834 | -0.02762 |         |
| C | 1.459983 | 0.613721 | 1.577602 | -0.08612 | -0.02432 |         |
| C | 1.934082 | 1.712224 | 0.878223 | 0.089884 | -0.01668 |         |
| O | 0.694707 | -2.71226 | -2.18307 | -0.1033  | -0.17399 |         |
| C | 1.890971 | -2.70803 | -2.94951 | -0.31382 | 0.05548  |         |
| O | -8.71498 | -1.36628 | -3.54624 | -0.15654 | -0.17715 |         |
| C | -9.00791 | -2.53673 | -4.29606 | -0.32475 | 0.056104 |         |
| O | 7.16413  | 5.425352 | 0.791845 | -0.15613 | -0.17668 |         |
| C | 7.786367 | 5.504484 | 2.066552 | -0.32563 | 0.056277 |         |
| O | -0.10572 | -0.43011 | 2.976005 | -0.10227 | -0.17352 |         |
| C | -1.28842 | -0.39327 | 3.762487 | -0.31251 | 0.055687 |         |
| H | 2.529766 | -3.47172 | -2.50877 | 0.169486 | 0.053799 |         |
| H | 1.696139 | -2.96028 | -3.9977  | 0.153049 | 0.04497  |         |
| H | 2.396586 | -1.73755 | -2.89631 | 0.148625 | 0.044898 |         |
| H | -        | 10.0729  | -2.7184  | -4.16086 | 0.178382 | 0.05379 |
| H | -8.79772 | -2.39261 | -5.3616  | 0.151567 | 0.045265 |         |
| H | -8.4438  | -3.40053 | -3.92709 | 0.150673 | 0.044833 |         |
| H | -1.40295 | -1.39433 | 4.175089 | 0.16998  | 0.053891 |         |
| H | -1.20147 | 0.328338 | 4.582226 | 0.153361 | 0.045083 |         |
| H | -2.16631 | -0.14952 | 3.154041 | 0.149067 | 0.045011 |         |
| H | 8.824023 | 5.773085 | 1.875308 | 0.179053 | 0.053909 |         |
| H | 7.322198 | 6.275451 | 2.691368 | 0.151688 | 0.045282 |         |
| H | 7.751794 | 4.542115 | 2.589081 | 0.150557 | 0.044847 |         |
| H | -8.94007 | 9.666189 | -5.98887 | 0.179884 | 0.055692 |         |
| H | -9.76987 | 10.1712  | -8.27074 | 0.160237 | 0.054509 |         |
| H | -8.23853 | 11.16545 | -9.95201 | 0.174775 | 0.055395 |         |
| H | -5.88167 | 11.66438 | -9.33464 | 0.215147 | 0.072541 |         |
| H | -6.58704 | 10.11815 | -5.39816 | 0.187096 | 0.068587 |         |
| H | -2.61288 | 12.14051 | -5.55682 | 0.222121 | 0.074007 |         |

|   |          |          |          |          |          |
|---|----------|----------|----------|----------|----------|
| H | -1.15579 | 10.86851 | -3.97948 | 0.17418  | 0.068442 |
| H | -4.86928 | 8.568302 | -6.37355 | 0.201101 | 0.080597 |
| H | -1.68915 | 2.221191 | -2.11558 | -0.05296 | 0.072193 |
| H | -4.95784 | 2.428303 | -4.86688 | 0.190495 | 0.074643 |
| H | -4.55665 | 4.845195 | -5.14954 | 0.23454  | 0.075283 |
| H | 0.445928 | 7.939544 | -1.86442 | 0.24573  | 0.0758   |
| H | 1.922264 | 6.691548 | -0.33247 | 0.190985 | 0.074718 |
| H | -0.24565 | 3.104137 | -1.18835 | -0.07663 | 0.072111 |
| H | -1.24174 | 0.629656 | -4.65372 | 0.174024 | 0.076928 |
| H | 0.649737 | -0.86339 | -4.20616 | 0.215709 | 0.06077  |
| H | -1.48837 | -2.58502 | -0.90452 | 0.210701 | 0.069727 |
| H | -3.3899  | -1.05297 | -1.35006 | 0.180016 | 0.07544  |
| H | -5.76867 | 1.696119 | -2.11322 | 0.162592 | 0.076126 |
| H | -8.03785 | 0.710365 | -2.26509 | 0.210578 | 0.069431 |
| H | -6.50354 | -2.39869 | -4.79709 | 0.203403 | 0.059977 |
| H | -4.26811 | -1.40112 | -4.66811 | 0.17556  | 0.075361 |
| H | 3.530019 | 4.641943 | -1.71667 | 0.163276 | 0.076381 |
| H | 5.914349 | 5.243005 | -1.40365 | 0.211099 | 0.069729 |
| H | 5.438885 | 4.858807 | 2.845959 | 0.20313  | 0.059971 |
| H | 3.074337 | 4.293608 | 2.531205 | 0.176976 | 0.075209 |
| H | -0.43987 | 3.972616 | 1.737344 | 0.172916 | 0.076834 |
| H | -1.31194 | 2.030931 | 2.957225 | 0.216039 | 0.060725 |
| H | 1.979043 | -0.33654 | 1.54274  | 0.211557 | 0.069863 |
| H | 2.842121 | 1.62777  | 0.292892 | 0.180319 | 0.075615 |

**E. Table S5:** Cartesian coordinates of optimized structure of compound **5**.  
Total Energy: -2667.86 Hartrees

| Atom | X        | y        | Z        | Mulliken | Lowdin   |
|------|----------|----------|----------|----------|----------|
|      |          |          |          | Charges  | Charges  |
| C    | 14.02263 | 5.17257  | 5.825564 | -0.30325 | -0.0276  |
| C    | 15.12085 | 4.332942 | 5.629634 | -0.2753  | -0.03955 |
| C    | 14.94848 | 2.954263 | 5.61552  | 0.358782 | 0.001089 |
| C    | 13.67094 | 2.397171 | 5.769063 | 1.271584 | -0.09413 |
| C    | 12.57395 | 3.24624  | 5.966554 | -0.865   | -0.02623 |
| C    | 13.55316 | 0.903913 | 5.796021 | -0.82272 | 0.024803 |
| C    | 12.29514 | 0.232219 | 5.323971 | 0.58119  | -0.07713 |
| C    | 11.97997 | -1.04476 | 5.878948 | 0.135381 | 0.008645 |
| C    | 10.88652 | -1.74939 | 5.454777 | -0.28974 | -0.01041 |
| C    | 10.05698 | -1.22891 | 4.423965 | 0.033276 | -0.04078 |
| C    | 10.38133 | 0.037625 | 3.843253 | 0.117275 | -0.0473  |
| C    | 11.50773 | 0.756536 | 4.321337 | -0.87068 | 0.005271 |
| N    | 8.984224 | -1.92695 | 3.998767 | 0.172277 | -0.04376 |

|   |          |          |          |          |          |
|---|----------|----------|----------|----------|----------|
| C | 8.247535 | -1.40673 | 3.027441 | -0.16937 | -0.02198 |
| C | 8.579081 | -0.13656 | 2.437238 | -0.24588 | -0.0263  |
| N | 9.627918 | 0.557994 | 2.851241 | 0.185461 | -0.03945 |
| O | 14.48175 | 0.219579 | 6.194635 | -0.18553 | -0.16    |
| C | 7.744513 | 0.403627 | 1.367267 | 0.153952 | -0.05226 |
| C | 7.082753 | -2.14342 | 2.546138 | 0.040725 | -0.05248 |
| C | 6.615067 | -0.31288 | 0.907054 | -0.20616 | -0.02467 |
| C | 5.827608 | 0.260944 | -0.10542 | -0.27524 | -0.01485 |
| C | 6.145768 | 1.490492 | -0.67396 | -0.27466 | -0.03804 |
| C | 7.285472 | 2.182301 | -0.22223 | -0.07307 | -0.02325 |
| C | 8.058551 | 1.645108 | 0.78475  | -0.27283 | 0.012706 |
| C | 6.751574 | -3.38848 | 3.110838 | -0.15388 | 0.015707 |
| C | 5.660441 | -4.10888 | 2.673322 | -0.00289 | -0.01744 |
| C | 4.862397 | -3.60365 | 1.630433 | -0.26037 | -0.0375  |
| C | 5.188879 | -2.37857 | 1.055828 | -0.34436 | -0.02223 |
| C | 6.281525 | -1.61836 | 1.504079 | -0.14694 | -0.02408 |
| N | 5.34454  | 2.021214 | -1.721   | 0.802871 | -0.08537 |
| C | 4.863614 | 1.133062 | -2.7376  | -0.45975 | -0.06556 |
| C | 5.016837 | 3.385923 | -1.76979 | 0.076124 | -0.026   |
| N | 3.749751 | -4.3535  | 1.160382 | 0.774212 | -0.08407 |
| C | 2.538897 | -3.73281 | 0.812921 | -0.35631 | -0.02587 |
| C | 3.899073 | -5.76921 | 1.00004  | -0.26747 | -0.06525 |
| C | 3.498388 | 1.074175 | -3.03538 | 0.040371 | -0.03067 |
| C | 3.03779  | 0.209084 | -4.02486 | -0.25363 | -0.03191 |
| C | 3.929867 | -0.61259 | -4.71277 | -0.44926 | -0.04415 |
| C | 5.290068 | -0.55981 | -4.40933 | -0.19239 | -0.03439 |
| C | 5.759178 | 0.312537 | -3.4308  | 0.14493  | -0.02763 |
| C | 4.824158 | 4.030168 | -3.00758 | 0.033862 | -0.02923 |
| C | 4.501192 | 5.375464 | -3.062   | -0.09213 | 0.014787 |
| C | 4.370003 | 6.097017 | -1.87695 | -0.63471 | -0.07402 |
| C | 4.549509 | 5.482954 | -0.63899 | -0.17045 | 0.013721 |
| C | 4.865899 | 4.135981 | -0.58686 | 0.040962 | -0.03337 |
| C | 1.736436 | -4.25808 | -0.21865 | 0.002326 | -0.03011 |
| C | 0.540143 | -3.65139 | -0.56298 | -0.0455  | 0.013873 |
| C | 0.131541 | -2.50638 | 0.11757  | -0.46709 | -0.07538 |
| C | 0.902371 | -1.97043 | 1.148436 | -0.02276 | 0.012156 |
| C | 2.094789 | -2.58198 | 1.494645 | -0.09243 | -0.03132 |
| C | 2.969552 | -6.64385 | 1.572476 | 0.145626 | -0.03114 |
| C | 3.118517 | -8.01897 | 1.415684 | -0.3519  | -0.03343 |
| C | 4.200795 | -8.53389 | 0.702568 | -0.35046 | -0.0434  |
| C | 5.132517 | -7.66214 | 0.140786 | -0.3987  | -0.03254 |
| C | 4.98225  | -6.28485 | 0.281701 | 0.233857 | -0.0285  |
| N | 4.037753 | 7.523018 | -1.9331  | -0.19566 | 0.155376 |
| N | -1.12656 | -1.8561  | -0.25567 | -0.21783 | 0.154901 |
| O | 3.859942 | 8.02742  | -3.03843 | -0.0078  | -0.18976 |
| O | -1.79495 | -2.36933 | -1.1493  | 0.000981 | -0.19094 |
| O | 3.957214 | 8.135126 | -0.87156 | -0.00947 | -0.19027 |
| O | -1.44196 | -0.83092 | 0.342653 | 0.000785 | -0.19011 |

|   |          |          |          |          |          |
|---|----------|----------|----------|----------|----------|
| H | 11.90115 | 5.276545 | 6.172972 | 0.183997 | 0.056849 |
| H | 14.1584  | 6.248136 | 5.844754 | 0.16429  | 0.056122 |
| H | 16.11005 | 4.755529 | 5.495019 | 0.178596 | 0.056761 |
| H | 15.79359 | 2.288894 | 5.487472 | 0.216911 | 0.073301 |
| H | 11.5854  | 2.830551 | 6.117689 | 0.184891 | 0.068151 |
| H | 12.63512 | -1.441   | 6.64466  | 0.229434 | 0.076091 |
| H | 10.62916 | -2.71248 | 5.879362 | 0.179519 | 0.070214 |
| H | 11.73326 | 1.706834 | 3.854372 | 0.20716  | 0.082329 |
| H | 4.946301 | -0.24786 | -0.46803 | -0.05187 | 0.07482  |
| H | 7.555264 | 3.12989  | -0.67137 | 0.184103 | 0.077692 |
| H | 8.938421 | 2.166412 | 1.138035 | 0.240262 | 0.077969 |
| H | 7.371934 | -3.7658  | 3.913008 | 0.252013 | 0.078159 |
| H | 5.414879 | -5.06115 | 3.126403 | 0.200337 | 0.078142 |
| H | 4.578136 | -2.02223 | 0.239161 | -0.01421 | 0.074447 |
| H | 2.803927 | 1.705001 | -2.49305 | 0.174361 | 0.07767  |
| H | 1.977849 | 0.169741 | -4.24851 | 0.205402 | 0.059863 |
| H | 3.567938 | -1.28766 | -5.47941 | 0.166682 | 0.056341 |
| H | 5.991631 | -1.18972 | -4.94445 | 0.19977  | 0.057501 |
| H | 6.81684  | 0.36183  | -3.20015 | 0.170293 | 0.076627 |
| H | 4.938444 | 3.470643 | -3.92652 | 0.193675 | 0.078538 |
| H | 4.364037 | 5.878267 | -4.00952 | 0.26219  | 0.081676 |
| H | 4.423412 | 6.061687 | 0.265754 | 0.264406 | 0.081625 |
| H | 4.988123 | 3.653797 | 0.373935 | 0.176406 | 0.077774 |
| H | 2.06236  | -5.13976 | -0.75421 | 0.197171 | 0.078688 |
| H | -0.07362 | -4.04317 | -1.36249 | 0.26216  | 0.08155  |
| H | 0.551246 | -1.09364 | 1.675237 | 0.263451 | 0.081806 |
| H | 2.686424 | -2.17748 | 2.305113 | 0.205211 | 0.07885  |
| H | 2.135706 | -6.24387 | 2.137319 | 0.166062 | 0.076403 |
| H | 2.393929 | -8.68923 | 1.8639   | 0.196609 | 0.058209 |
| H | 4.317901 | -9.60509 | 0.587767 | 0.167653 | 0.056251 |
| H | 5.975368 | -8.05299 | -0.41778 | 0.197493 | 0.057902 |
| H | 5.702716 | -5.60655 | -0.15992 | 0.155906 | 0.076417 |

**F. Table S6:** Cartesian coordinates of optimized structure of compound **6**.  
Total Energy: -3052.74 Hartrees

| Atom | X        | y        | Z        | Mulliken | Lowdin   |
|------|----------|----------|----------|----------|----------|
|      |          |          |          | Charges  | Charges  |
| C    | 12.58624 | 8.268526 | 0.96658  | -0.29511 | -0.02727 |
| C    | 12.23878 | 9.311842 | 0.106195 | -0.31454 | -0.03916 |
| C    | 10.9052  | 9.668556 | -0.05145 | 0.434563 | 0.001823 |
| C    | 9.898345 | 8.968597 | 0.628657 | 1.215028 | -0.09438 |
| C    | 10.25495 | 7.923273 | 1.490882 | -0.95131 | -0.02602 |
| C    | 8.48373  | 9.43189  | 0.46193  | -0.80367 | 0.024983 |
| C    | 7.344556 | 8.461295 | 0.599313 | 0.628487 | -0.07532 |
| C    | 6.08528  | 8.978287 | 1.031044 | 0.271386 | 0.010616 |

|   |          |          |          |          |          |
|---|----------|----------|----------|----------|----------|
| C | 4.983332 | 8.172798 | 1.120376 | -0.23679 | -0.00809 |
| C | 5.069849 | 6.802103 | 0.751743 | -0.05813 | -0.03921 |
| C | 6.321156 | 6.282563 | 0.292254 | 0.216573 | -0.04592 |
| C | 7.453239 | 7.13731  | 0.233856 | -0.97546 | 0.005742 |
| N | 3.982703 | 6.009017 | 0.829338 | 0.167557 | -0.03856 |
| C | 4.107781 | 4.741636 | 0.463298 | -0.22536 | -0.02012 |
| C | 5.364007 | 4.221221 | -0.00365 | -0.23533 | -0.02505 |
| N | 6.43863  | 4.991272 | -0.08047 | 0.205731 | -0.03578 |
| C | 5.466692 | 2.815989 | -0.40024 | 0.022045 | -0.04341 |
| C | 2.939417 | 3.863723 | 0.534773 | -0.09402 | -0.04396 |
| C | 4.333317 | 1.973211 | -0.32741 | -0.29292 | -0.02833 |
| C | 4.484604 | 0.627709 | -0.71435 | -0.53223 | 0.00998  |
| C | 5.699333 | 0.13158  | -1.15581 | -0.74567 | -0.04959 |
| C | 6.816692 | 0.977532 | -1.22745 | -0.06761 | -0.02565 |
| C | 6.694652 | 2.301554 | -0.85297 | -0.18685 | 0.005084 |
| C | 1.708568 | 4.368287 | 0.98853  | -0.29529 | 0.012948 |
| C | 0.590237 | 3.559377 | 1.056578 | 0.181577 | 0.004827 |
| C | 0.681152 | 2.217352 | 0.666997 | -0.06412 | -0.04557 |
| C | 1.891111 | 1.706148 | 0.220437 | -0.3295  | -0.01884 |
| C | 3.045429 | 2.507459 | 0.143907 | -0.24868 | -0.03299 |
| N | 5.779164 | -1.25522 | -1.52906 | 1.126621 | -0.09664 |
| N | -0.49654 | 1.396271 | 0.737131 | 1.06136  | -0.09766 |
| O | 8.242695 | 10.60059 | 0.207411 | -0.18183 | -0.15815 |
| C | 5.723475 | -1.58227 | -2.91058 | -0.19971 | -0.0447  |
| C | 5.500799 | -2.91126 | -3.3138  | -0.0991  | -0.25845 |
| S | 5.119709 | -4.15588 | -2.09966 | -0.43624 | 0.561539 |
| C | 6.132319 | -3.557   | -0.76417 | -0.08899 | -0.25839 |
| C | 6.304764 | -2.17331 | -0.58043 | -0.19828 | -0.04481 |
| C | -0.66463 | 0.548757 | 1.864532 | -0.36771 | -0.04435 |
| C | -1.92698 | 0.000222 | 2.154347 | -0.1168  | -0.25818 |
| S | -3.35061 | 0.499892 | 1.210022 | -0.49845 | 0.55998  |
| C | -2.5705  | 0.712787 | -0.37561 | -0.1169  | -0.25825 |
| C | -1.25336 | 1.200594 | -0.44925 | -0.36898 | -0.0443  |
| C | 6.666843 | -4.46776 | 0.144637 | 0.405838 | -0.06308 |
| C | 7.335218 | -4.02458 | 1.28362  | -0.25953 | -0.05687 |
| C | 7.482058 | -2.65755 | 1.492176 | -0.22965 | -0.03687 |
| C | 6.986308 | -1.74187 | 0.565941 | -0.0566  | -0.04746 |
| C | 5.865096 | -0.60736 | -3.90775 | -0.0584  | -0.04764 |
| C | 5.796583 | -0.94791 | -5.25739 | -0.24221 | -0.03632 |
| C | 5.613524 | -2.27074 | -5.64509 | -0.25467 | -0.05679 |
| C | 5.476046 | -3.25078 | -4.66474 | 0.417176 | -0.06304 |
| C | -3.31072 | 0.4848   | -1.53368 | 0.330288 | -0.0633  |
| C | -2.78133 | 0.790049 | -2.78556 | -0.19304 | -0.05639 |
| C | -1.49286 | 1.306522 | -2.86732 | -0.24494 | -0.03558 |



|   |          |          |          |          |          |
|---|----------|----------|----------|----------|----------|
| C | -0.73117 | 1.496435 | -1.71593 | -0.26848 | -0.04553 |
| C | 0.398038 | 0.244848 | 2.72663  | -0.25173 | -0.04592 |
| C | 0.209352 | -0.58116 | 3.83301  | -0.26977 | -0.03578 |
| C | -1.03474 | -1.14682 | 4.089687 | -0.18437 | -0.05659 |
| C | -2.09841 | -0.8589  | 3.237518 | 0.323938 | -0.06335 |
| H | 11.86305 | 6.783144 | 2.346173 | 0.18437  | 0.056739 |
| H | 13.62767 | 7.995824 | 1.095823 | 0.163922 | 0.056095 |
| H | 13.00962 | 9.849136 | -0.43446 | 0.178743 | 0.056931 |
| H | 10.62145 | 10.49032 | -0.69758 | 0.218122 | 0.073597 |
| H | 9.491264 | 7.393182 | 2.046409 | 0.180739 | 0.068118 |
| H | 6.028088 | 10.02992 | 1.282704 | 0.231597 | 0.076596 |
| H | 4.02647  | 8.550618 | 1.460322 | 0.182375 | 0.071282 |
| H | 8.38314  | 6.717134 | -0.12786 | 0.201515 | 0.082608 |
| H | 3.653175 | -0.06238 | -0.67628 | -0.06589 | 0.080027 |
| H | 7.765972 | 0.586062 | -1.57384 | 0.171886 | 0.08193  |
| H | 7.543561 | 2.970687 | -0.8995  | 0.283341 | 0.077335 |
| H | 1.658466 | 5.408311 | 1.282084 | 0.252328 | 0.077645 |
| H | -0.36021 | 3.945473 | 1.404633 | 0.171265 | 0.079321 |
| H | 1.921986 | 0.665664 | -0.07245 | 0.267501 | 0.081    |
| H | 6.536428 | -5.52861 | -0.03679 | 0.176472 | 0.061092 |
| H | 7.730147 | -4.73991 | 1.994966 | 0.156059 | 0.054177 |
| H | 7.994124 | -2.29039 | 2.374189 | 0.178956 | 0.055331 |
| H | 7.12091  | -0.68462 | 0.746206 | 0.183333 | 0.070175 |
| H | 6.016766 | 0.427024 | -3.63308 | 0.184167 | 0.070199 |
| H | 5.898751 | -0.16818 | -6.00341 | 0.178972 | 0.055605 |
| H | 5.573231 | -2.54098 | -6.69342 | 0.15623  | 0.054247 |
| H | 5.325823 | -4.28777 | -4.94286 | 0.176122 | 0.061088 |
| H | -4.31501 | 0.086096 | -1.44531 | 0.171523 | 0.06091  |
| H | -3.37158 | 0.627859 | -3.67942 | 0.158977 | 0.054184 |
| H | -1.06307 | 1.555791 | -3.83064 | 0.175371 | 0.055737 |
| H | 0.271349 | 1.890186 | -1.80644 | 0.173583 | 0.069866 |
| H | 1.376993 | 0.664935 | 2.543692 | 0.173265 | 0.06961  |
| H | 1.049479 | -0.7873  | 4.486139 | 0.174723 | 0.055624 |
| H | -1.18166 | -1.80052 | 4.941009 | 0.159091 | 0.054142 |
| H | -3.07874 | -1.28405 | 3.420605 | 0.171444 | 0.060914 |

**G. Table S7:** Cartesian coordinates of optimized structure of compound 7.

Total Energy: -2256.37 Hartrees

| Atom | X        | y      | Z        | Mulliken | Lowdin  |
|------|----------|--------|----------|----------|---------|
|      |          |        |          | Charges  | Charges |
| C    | -9.85283 | 4.6339 | 8.466412 | -0.26459 | -0.0279 |

|   |          |          |          |          |          |
|---|----------|----------|----------|----------|----------|
| C | -9.06455 | 4.752736 | 7.323602 | -0.28863 | -0.04219 |
| C | -7.67538 | 4.739694 | 7.428974 | -0.80114 | -0.02588 |
| C | -7.0633  | 4.62581  | 8.684158 | 1.274956 | -0.09405 |
| C | -7.86515 | 4.530982 | 9.830516 | 0.368426 | 0.001292 |
| C | -5.5775  | 4.68616  | 8.867363 | -0.87809 | 0.024745 |
| C | -4.6587  | 4.169763 | 7.796877 | 0.63808  | -0.07679 |
| C | -3.35822 | 4.751739 | 7.704418 | 0.178364 | 0.009111 |
| C | -2.44184 | 4.293855 | 6.797536 | -0.2864  | -0.00941 |
| C | -2.76361 | 3.200567 | 5.947309 | -0.02045 | -0.04007 |
| C | -4.05439 | 2.593235 | 6.053369 | 0.130057 | -0.04677 |
| C | -4.99306 | 3.106647 | 6.986001 | -0.83057 | 0.005611 |
| N | -1.85865 | 2.742537 | 5.058935 | 0.172365 | -0.04171 |
| C | -2.19881 | 1.712797 | 4.297073 | -0.18485 | -0.02076 |
| C | -3.49414 | 1.097235 | 4.409501 | -0.27476 | -0.02531 |
| N | -4.39095 | 1.542572 | 5.276085 | 0.192585 | -0.03751 |
| C | -3.83395 | -0.03934 | 3.554474 | 0.171482 | -0.04713 |
| C | -1.23453 | 1.197801 | 3.327176 | 0.13281  | -0.04814 |
| C | -2.89655 | -0.5305  | 2.615521 | -0.12213 | -0.02679 |
| C | -3.26579 | -1.63163 | 1.822574 | -0.30724 | -0.00783 |
| C | -4.51917 | -2.21847 | 1.933991 | -0.11424 | -0.02924 |
| C | -5.44451 | -1.71954 | 2.864564 | -0.06646 | -0.01226 |
| C | -5.09606 | -0.64941 | 3.663545 | -0.2633  | 0.011642 |
| C | 0.034141 | 1.793693 | 3.212405 | -0.20854 | 0.013279 |
| C | 0.96642  | 1.323017 | 2.310348 | -0.01262 | -0.01275 |
| C | 0.640163 | 0.238481 | 1.480079 | -0.10844 | -0.02762 |
| C | -0.61273 | -0.35281 | 1.576091 | -0.31472 | -0.00884 |
| C | -1.57024 | 0.099034 | 2.501222 | -0.07938 | -0.02562 |
| N | -4.86457 | -3.31765 | 1.106598 | 0.733396 | -0.02954 |
| N | 1.588643 | -0.25643 | 0.549718 | 0.732523 | -0.02872 |
| O | -5.10078 | 5.150264 | 9.890273 | -0.18622 | -0.1592  |
| C | -5.29594 | -4.57238 | 1.552961 | 0.287114 | -0.02219 |
| C | -5.5549  | -5.39481 | 0.429419 | 0.211764 | -0.06376 |
| C | -5.26973 | -4.60158 | -0.7476  | 0.226338 | -0.064   |
| C | -4.84534 | -3.32894 | -0.29385 | 0.143268 | -0.02118 |
| C | 2.048888 | -1.5775  | 0.47091  | 0.122803 | -0.02098 |
| C | 2.999321 | -1.66968 | -0.57472 | 0.228133 | -0.06379 |
| C | 3.117734 | -0.34851 | -1.15442 | 0.215269 | -0.06346 |
| C | 2.237302 | 0.496933 | -0.43653 | 0.28472  | -0.02198 |
| C | 1.728017 | -2.67931 | 1.265161 | -0.40508 | -0.05002 |
| C | 2.359531 | -3.88711 | 0.983869 | -0.35534 | -0.03596 |
| C | 3.292497 | -3.99943 | -0.05841 | -0.35276 | -0.05946 |
| C | 3.619207 | -2.89502 | -0.83655 | -0.28385 | -0.02174 |
| C | 3.866697 | 0.175261 | -2.21215 | -0.20852 | -0.02196 |
| C | 3.727818 | 1.518908 | -2.54026 | -0.32672 | -0.06022 |

|     |          |          |          |          |          |
|-----|----------|----------|----------|----------|----------|
| C   | 2.840258 | 2.33955  | -1.82729 | -0.51182 | -0.03758 |
| C   | 2.081934 | 1.842927 | -0.77134 | -0.41033 | -0.05149 |
| C   | -5.43647 | -5.05009 | 2.856821 | -0.40623 | -0.05139 |
| C   | -5.86177 | -6.36481 | 3.022346 | -0.51455 | -0.03761 |
| C   | -6.13598 | -7.18929 | 1.920176 | -0.32465 | -0.06057 |
| C   | -5.98064 | -6.71206 | 0.623894 | -0.20531 | -0.0221  |
| C   | -5.35165 | -4.85084 | -2.12076 | -0.28095 | -0.02184 |
| C   | -5.01861 | -3.83935 | -3.01403 | -0.36152 | -0.05996 |
| C   | -4.61308 | -2.57951 | -2.54713 | -0.35055 | -0.03635 |
| C   | -4.52294 | -2.30518 | -1.18583 | -0.4251  | -0.05022 |
| H   | -9.86238 | 4.432375 | 10.61117 | 0.177603 | 0.056698 |
| H - | 10.93383 | 4.634685 | 8.381873 | 0.163513 | 0.055906 |
| H   | -9.53004 | 4.857486 | 6.350227 | 0.184645 | 0.056706 |
| H   | -7.06998 | 4.844871 | 6.537262 | 0.182172 | 0.068261 |
| H   | -7.38299 | 4.467172 | 10.79842 | 0.218838 | 0.073412 |
| H   | -3.11768 | 5.565884 | 8.376655 | 0.229541 | 0.07614  |
| H   | -1.45754 | 4.737787 | 6.707686 | 0.181837 | 0.070635 |
| H   | -5.95741 | 2.618614 | 7.049258 | 0.206102 | 0.082486 |
| H   | -2.57199 | -2.05887 | 1.11247  | 0.119442 | 0.076342 |
| H   | -6.42711 | -2.16899 | 2.938315 | 0.199456 | 0.077798 |
| H   | -5.79708 | -0.24822 | 4.383355 | 0.231592 | 0.077337 |
| H   | 0.268473 | 2.625028 | 3.863857 | 0.243223 | 0.077826 |
| H   | 1.950265 | 1.771129 | 2.247293 | 0.20186  | 0.077797 |
| H   | -0.8364  | -1.16912 | 0.904121 | 0.132204 | 0.076135 |
| H   | 1.019284 | -2.60226 | 2.079972 | 0.174833 | 0.067653 |
| H   | 2.125222 | -4.75751 | 1.586164 | 0.171367 | 0.054863 |
| H   | 3.764412 | -4.95545 | -0.25258 | 0.165405 | 0.053033 |
| H   | 4.34895  | -2.98205 | -1.63391 | 0.131666 | 0.060614 |
| H   | 4.54424  | -0.4594  | -2.77249 | 0.13268  | 0.060635 |
| H   | 4.304105 | 1.937668 | -3.35693 | 0.162158 | 0.052855 |
| H   | 2.738217 | 3.382473 | -2.1052  | 0.170521 | 0.054326 |
| H   | 1.391706 | 2.483008 | -0.23658 | 0.1544   | 0.067361 |
| H   | -5.2173  | -4.42641 | 3.71438  | 0.155039 | 0.06754  |
| H   | -5.97935 | -6.75894 | 4.025435 | 0.170233 | 0.054331 |
| H   | -6.46593 | -8.20844 | 2.084196 | 0.162214 | 0.052795 |
| H   | -6.18237 | -7.35535 | -0.22543 | 0.132676 | 0.060573 |
| H   | -5.67491 | -5.81976 | -2.48485 | 0.131929 | 0.060566 |
| H   | -5.07597 | -4.02079 | -4.08087 | 0.164878 | 0.052935 |
| H   | -4.36583 | -1.80083 | -3.2597  | 0.171958 | 0.054683 |
| H   | -4.21854 | -1.32653 | -0.83694 | 0.173193 | 0.06754  |

**H. Table S8:** Cartesian coordinates of optimized structure of compound **8**.  
Total Energy: -1796.94 Hartrees

| Atom | X        | y        | Z        | Mulliken | Lowdin   |
|------|----------|----------|----------|----------|----------|
|      |          |          |          | Charges  | Charges  |
| C    | -5.67797 | -5.61998 | 5.862785 | -0.28451 | -0.03113 |
| C    | -5.24845 | -6.21558 | 4.678661 | -0.27803 | -0.04376 |
| C    | -6.17835 | -6.62742 | 3.726076 | -0.83016 | -0.02624 |
| C    | -7.54978 | -6.46209 | 3.959386 | 1.302108 | -0.09204 |
| C    | -7.9728  | -5.88388 | 5.164489 | 0.345044 | -0.00029 |
| C    | -8.59882 | -6.95767 | 3.008222 | -0.84237 | 0.024559 |
| C    | -8.33447 | -6.97941 | 1.532433 | 0.631691 | -0.08311 |
| C    | -9.0467  | -7.93381 | 0.746045 | 0.177108 | 0.002962 |
| C    | -8.89911 | -7.97842 | -0.6139  | -0.26326 | -0.01294 |
| C    | -8.04993 | -7.04838 | -1.27386 | 0.002303 | -0.04351 |
| C    | -7.35592 | -6.06976 | -0.49656 | -0.08337 | -0.05138 |
| C    | -7.50942 | -6.06291 | 0.913503 | -0.8407  | 0.003606 |
| N    | -7.90845 | -7.09149 | -2.61507 | 0.160322 | -0.04995 |
| C    | -7.11426 | -6.19657 | -3.18656 | -0.14596 | -0.01992 |
| C    | -6.42518 | -5.20058 | -2.40355 | -0.32051 | -0.02478 |
| N    | -6.554   | -5.156   | -1.08628 | 0.17728  | -0.04539 |
| O    | -9.67573 | -7.34433 | 3.434714 | -0.19031 | -0.16475 |
| C    | -6.9359  | -6.21942 | -4.63148 | 0.007888 | -0.0664  |
| C    | -6.10159 | -5.27748 | -5.27402 | 0.075983 | -0.01787 |
| C    | -5.40725 | -4.25025 | -4.47463 | 0.055117 | -0.01958 |
| C    | -5.57146 | -4.22678 | -3.07229 | 0.048037 | -0.06535 |
| C    | -7.59521 | -7.18942 | -5.41132 | -0.23965 | 0.012717 |
| C    | -7.44483 | -7.24329 | -6.77677 | -0.15891 | -0.03845 |
| C    | -6.61839 | -6.30905 | -7.44622 | -0.14573 | -0.03073 |
| C    | -5.97055 | -5.34103 | -6.67357 | -0.28707 | -0.05463 |
| C    | -4.56651 | -3.29026 | -5.06897 | -0.33392 | -0.0541  |
| C    | -3.90672 | -2.30764 | -4.32658 | -0.15019 | -0.03245 |
| C    | -4.09187 | -2.3042  | -2.92362 | -0.19882 | -0.03777 |
| C    | -4.89913 | -3.24185 | -2.32369 | -0.17821 | 0.011025 |
| N    | -3.11825 | -1.31347 | -4.93004 | 0.271163 | -0.15911 |
| N    | -6.43666 | -6.40379 | -8.8351  | 0.270366 | -0.15743 |
| C    | -3.07934 | -1.23486 | -6.38822 | -0.04248 | -0.03114 |
| C    | -2.50605 | 0.111847 | -6.82457 | -0.53087 | 0.025973 |
| O    | -1.22252 | 0.347211 | -6.26351 | -0.11042 | -0.22911 |
| C    | -1.28639 | 0.324196 | -4.84312 | -0.38063 | 0.024146 |
| C    | -1.80885 | -1.01328 | -4.33351 | -0.12838 | -0.0148  |
| C    | -5.46463 | -5.52534 | -9.48139 | -0.05099 | -0.0306  |
| C    | -5.1356  | -6.04566 | -10.8789 | -0.52611 | 0.025967 |
| O    | -6.30127 | -6.19684 | -11.6764 | -0.10933 | -0.22896 |
| C    | -7.2133  | -7.09887 | -11.0627 | -0.38597 | 0.024328 |
| C    | -7.62288 | -6.61623 | -9.67688 | -0.118   | -0.01436 |
| H    | -7.37966 | -4.99377 | 7.025952 | 0.175639 | 0.055771 |

|   |          |          |          |          |          |
|---|----------|----------|----------|----------|----------|
| H | -4.95278 | -5.29158 | 6.599062 | 0.161015 | 0.054847 |
| H | -4.18986 | -6.36151 | 4.495871 | 0.181323 | 0.05586  |
| H | -5.83672 | -7.10015 | 2.813694 | 0.184021 | 0.06854  |
| H | -9.03575 | -5.78307 | 5.347204 | 0.216315 | 0.072863 |
| H | -9.70898 | -8.62093 | 1.257713 | 0.222511 | 0.07445  |
| H | -9.42216 | -8.70899 | -1.21971 | 0.178146 | 0.068789 |
| H | -6.97911 | -5.30187 | 1.471824 | 0.206423 | 0.080926 |
| H | -8.21971 | -7.91183 | -4.90221 | 0.225095 | 0.075756 |
| H | -7.93977 | -8.02981 | -7.33136 | 0.168863 | 0.060588 |
| H | -5.35958 | -4.60677 | -7.17285 | 0.027753 | 0.055548 |
| H | -4.41323 | -3.32016 | -6.13566 | 0.034841 | 0.055743 |
| H | -3.62656 | -1.54022 | -2.31428 | 0.170309 | 0.060779 |
| H | -5.04807 | -3.22792 | -1.25188 | 0.204595 | 0.075252 |
| H | -4.09554 | -1.31968 | -6.77944 | 0.14233  | 0.060957 |
| H | -2.47305 | -2.04772 | -6.82319 | 0.174493 | 0.061504 |
| H | -3.19454 | 0.917288 | -6.5299  | 0.155406 | 0.057526 |
| H | -2.38146 | 0.134932 | -7.90858 | 0.187155 | 0.05601  |
| H | -1.9335  | 1.138917 | -4.48629 | 0.139907 | 0.056639 |
| H | -0.27067 | 0.496192 | -4.48302 | 0.185291 | 0.056421 |
| H | -1.89137 | -0.97365 | -3.24836 | 0.117599 | 0.055123 |
| H | -1.08588 | -1.80607 | -4.5863  | 0.178531 | 0.066489 |
| H | -4.54372 | -5.51409 | -8.89451 | 0.142477 | 0.060755 |
| H | -5.84005 | -4.49053 | -9.55475 | 0.177209 | 0.06204  |
| H | -4.61227 | -7.00962 | -10.7979 | 0.155385 | 0.057549 |
| H | -4.48981 | -5.33807 | -11.4017 | 0.187111 | 0.056145 |
| H | -6.75829 | -8.09776 | -10.9916 | 0.140176 | 0.056711 |
| H | -8.08478 | -7.15378 | -11.7173 | 0.185629 | 0.056661 |
| H | -8.27859 | -7.35698 | -9.22198 | 0.11652  | 0.055214 |
| H | -8.19248 | -5.67743 | -9.77204 | 0.181223 | 0.066953 |

**13. Main vertical electronic transition in implicit water**  
**Compound 1**

|    |         |         |                    |        |
|----|---------|---------|--------------------|--------|
| 1  | 406.7nm | 0.7856, | (HOMO -> LUMO )    | -96%   |
| 2  | 400.6nm | 0.1436, | (HOMO-1 -> LUMO )  | -96%   |
| 3  | 386.6nm | 0.0041, | (HOMO-3 -> LUMO )  | (54%), |
| 4  | 353.9nm | 0.0925, | (HOMO-2 -> LUMO )  | (93%), |
| 5  | 349.7nm | 0.0041, | (HOMO-7 -> LUMO )  | (24%), |
| 6  | 323.1nm | 0.7805, | (HOMO-1 -> LUMO+1) | -69%   |
| 7  | 321.5nm | 0.0912, | (HOMO-4 -> LUMO )  | (39%), |
| 8  | 318.2nm | 0.2402, | (HOMO -> LUMO+1)   | (58%), |
| 9  | 314.8nm | 0.0620, | (HOMO-6 -> LUMO )  | (70%), |
| 10 | 313.1nm | 0.0735, | (HOMO -> LUMO+1)   | (24%), |

**Compound 2**

|    |         |         |                    |        |
|----|---------|---------|--------------------|--------|
| 1  | 572.9nm | 0.7155, | (HOMO -> LUMO )    | -99%   |
| 2  | 554.8nm | 0.1515, | (HOMO-1 -> LUMO )  | -99%   |
| 3  | 427.0nm | 0.2613, | (HOMO -> LUMO+1)   | -94%   |
| 4  | 412.9nm | 0.3610, | (HOMO-1 -> LUMO+1) | -92%   |
| 5  | 396.1nm | 0.0887, | (HOMO-2 -> LUMO )  | -91%   |
| 6  | 384.2nm | 0.0021, | (HOMO-5 -> LUMO )  | -81%   |
| 7  | 381.7nm | 0.0090, | (HOMO -> LUMO+2)   | -94%   |
| 8  | 371.9nm | 0.1685, | (HOMO-1 -> LUMO+2) | -83%   |
| 9  | 360.7nm | 0.2682, | (HOMO-3 -> LUMO )  | -79%   |
| 10 | 359.8nm | 0.1907, | (HOMO -> LUMO+3)   | (77%), |

### Compound 3

|    |         |         |                    |        |
|----|---------|---------|--------------------|--------|
| 1  | 557.4nm | 0.7601, | (HOMO -> LUMO )    | -99%   |
| 2  | 533.8nm | 0.1433, | (HOMO-1 -> LUMO )  | -98%   |
| 3  | 421.1nm | 0.2602, | (HOMO -> LUMO+1)   | -90%   |
| 4  | 405.4nm | 0.2549, | (HOMO-1 -> LUMO+1) | (51%), |
| 5  | 402.7nm | 0.0813, | (HOMO-1 -> LUMO+1) | (35%), |
| 6  | 393.0nm | 0.2404, | (HOMO-3 -> LUMO )  | (60%), |
| 7  | 385.2nm | 0.2777, | (HOMO -> LUMO+2)   | (59%), |
| 8  | 383.1nm | 0.0569, | (HOMO -> LUMO+3)   | (40%), |
| 9  | 382.9nm | 0.0382, | (HOMO-9 -> LUMO )  | (52%), |
| 10 | 374.4nm | 0.0049, | (HOMO -> LUMO+4)   | (63%), |

### Compound 4

|    |         |         |                    |        |
|----|---------|---------|--------------------|--------|
| 1  | 622.3nm | 0.6358, | (HOMO -> LUMO )    | -98%   |
| 2  | 603.5nm | 0.2311, | (HOMO-1 -> LUMO )  | -98%   |
| 3  | 456.8nm | 0.2484, | (HOMO -> LUMO+1)   | -96%   |
| 4  | 441.2nm | 0.2858, | (HOMO-1 -> LUMO+1) | -96%   |
| 5  | 404.5nm | 0.0028, | (HOMO -> LUMO+2)   | -86%   |
| 6  | 402.5nm | 0.0226, | (HOMO-2 -> LUMO )  | (62%), |
| 7  | 392.5nm | 0.1639, | (HOMO-1 -> LUMO+2) | (67%), |
| 8  | 383.2nm | 0.0064, | (HOMO-7 -> LUMO )  | -89%   |
| 9  | 377.8nm | 0.4053, | (HOMO-3 -> LUMO )  | (52%), |
| 10 | 376.0nm | 0.1466, | (HOMO -> LUMO+3)   | -85%   |

Compound 5

|    |         |         |                    |        |
|----|---------|---------|--------------------|--------|
| 1  | 534.4nm | 1.0575, | (HOMO -> LUMO )    | -95%   |
| 2  | 518.5nm | 0.2170, | (HOMO-1 -> LUMO )  | (82%), |
| 3  | 491.5nm | 0.1814, | (HOMO -> LUMO+1)   | (72%), |
| 4  | 475.8nm | 0.4704, | (HOMO -> LUMO+2)   | (47%), |
| 5  | 465.6nm | 0.1212, | (HOMO -> LUMO+2)   | (45%), |
| 6  | 452.6nm | 0.0020, | (HOMO-1 -> LUMO+2) | (75%), |
| 7  | 394.4nm | 0.0304, | (HOMO-2 -> LUMO )  | -83%   |
| 8  | 386.6nm | 0.0027, | (HOMO-5 -> LUMO )  | (63%), |
| 9  | 384.7nm | 0.2152, | (HOMO -> LUMO+3)   | -87%   |
| 10 | 376.8nm | 0.2462, | (HOMO-1 -> LUMO+3) | -81%   |

Compound 6

|    |         |         |                    |        |
|----|---------|---------|--------------------|--------|
| 1  | 605.2nm | 0.0001, | (HOMO -> LUMO )    | -96%   |
| 2  | 599.9nm | 0.0001, | (HOMO-1 -> LUMO )  | -96%   |
| 3  | 436.2nm | 0.0001, | (HOMO-1 -> LUMO+1) | (81%), |
| 4  | 429.8nm | 0.0001, | (HOMO -> LUMO+1)   | (80%), |
| 5  | 403.8nm | 0.0419, | (HOMO-4 -> LUMO )  | (97%), |
| 6  | 398.7nm | 0.0002, | (HOMO-2 -> LUMO )  | (95%), |
| 7  | 397.1nm | 0.0016, | (HOMO-3 -> LUMO )  | (95%), |
| 8  | 393.4nm | 0.8393, | (HOMO-5 -> LUMO )  | (94%), |
| 9  | 392.5nm | 0.0016, | (HOMO -> LUMO+2)   | -86%   |
| 10 | 391.8nm | 0.0006, | (HOMO-1 -> LUMO+2) | -83%   |



Compound 7

|    |         |         |                    |        |
|----|---------|---------|--------------------|--------|
| 1  | 510.1nm | 0.4202, | (HOMO -> LUMO )    | -96%   |
| 2  | 503.2nm | 0.0336, | (HOMO-1 -> LUMO )  | -96%   |
| 3  | 425.8nm | 0.0003, | (HOMO-3 -> LUMO )  | -98%   |
| 4  | 425.3nm | 0.0002, | (HOMO-2 -> LUMO )  | -97%   |
| 5  | 394.8nm | 0.0381, | (HOMO-4 -> LUMO )  | -93%   |
| 6  | 386.8nm | 0.0053, | (HOMO-7 -> LUMO )  | (60%), |
| 7  | 385.7nm | 0.1848, | (HOMO -> LUMO+1)   | (64%), |
| 8  | 380.6nm | 0.0492, | (HOMO-1 -> LUMO+1) | (39%), |
| 9  | 374.6nm | 0.8018, | (HOMO-5 -> LUMO )  | (60%), |
| 10 | 351.2nm | 0.0563, | (HOMO-6 -> LUMO )  | (79%), |

Compound 8

|    |         |         |                    |        |
|----|---------|---------|--------------------|--------|
| 1  | 501.6nm | 0.8005, | (HOMO -> LUMO )    | -98%   |
| 2  | 485.0nm | 0.1170, | (HOMO-1 -> LUMO )  | -97%   |
| 3  | 385.6nm | 0.0578, | (HOMO -> LUMO+1)   | (71%), |
| 4  | 382.3nm | 0.0225, | (HOMO-4 -> LUMO )  | (56%), |
| 5  | 380.4nm | 0.2018, | (HOMO-2 -> LUMO )  | (71%), |
| 6  | 373.8nm | 0.5124, | (HOMO-1 -> LUMO+1) | (94%), |
| 7  | 344.3nm | 0.0237, | (HOMO-6 -> LUMO )  | (28%), |
| 8  | 338.8nm | 0.0101, | (HOMO -> LUMO+2)   | (92%), |
| 9  | 332.7nm | 0.0642, | (HOMO-3 -> LUMO )  | -70%   |
| 10 | 326.4nm | 0.1775, | (HOMO-1 -> LUMO+2) | -88%   |

14. Thermogram (TGA) curve of 1.

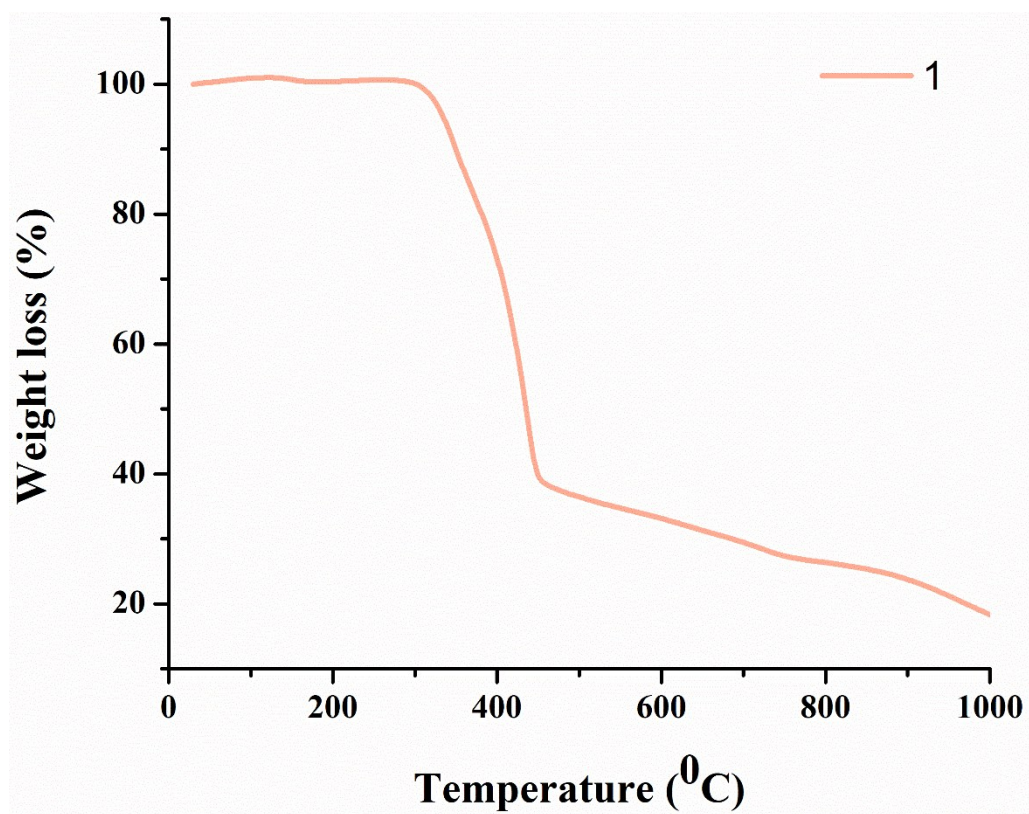

Figure S43: Thermogram (TGA) curve of 1.
